# Supplementary material for: Widespread Genome Reorganization of an Obligate Virus Mutualist
Source: PubMed Central journal article supplement (PMC4169385; doi:10.1371/journal.pgen.1004660), 2014-09-18
Supplement: pgen.1004660.s005.pdf [file pgen.1004660.s005.pdf]

| Scaffold            | Start  | End    | Locus tag | Gene symbol | Note                                                                                                                                            | Description                                                       |
|---------------------|--------|--------|-----------|-------------|-------------------------------------------------------------------------------------------------------------------------------------------------|-------------------------------------------------------------------|
| Mdem_contig_4062422 | 1      | 1286   | K425_1    | odv-e66-1   |                                                                                                                                                 | putative envelope protein ODV-E66-1                               |
| Mdem_contig_4124537 | 768    | 1203   | K425_2    | orph-D2     |                                                                                                                                                 | Segment D hypothetical protein                                    |
| Mdem_contig_4124537 | 2205   | 2528   | K425_3    | orph-D3     |                                                                                                                                                 | Segment D hypothetical protein                                    |
| Mdem_contig_4139115 | 1      | 14134  | K425_4    |             |                                                                                                                                                 | putative cytoplasmic dynein 2 heavy chain 1-like protein          |
| Mdem_contig_4139115 | 14435  | 15375  | K425_5    | odv-e66-2   |                                                                                                                                                 | putative envelope protein ODV-E66-2                               |
| Mdem_scaffold_0004  | 1      | 597    | K425_1373 | odv-e66-9   | similar to GFP_L7_0780, GIP_L8_0020                                                                                                             | putative envelope protein ODV-E66-9, partial                      |
| Mdem_scaffold_0004  | 1726   | 4238   | K425_1374 | odv-e66-10  | similar to GFP_L7_0780, GIP_L8_0020                                                                                                             | putative envelope protein ODV-E66-10                              |
| Mdem_scaffold_0004  | 9277   | 14712  | K425_1499 |             |                                                                                                                                                 | eye-specific diacylglycerol kinase-like protein                   |
| Mdem_scaffold_0004  | 34280  | 45157  | K425_1498 |             |                                                                                                                                                 | upheld-like protein                                               |
| Mdem_scaffold_0004  | 46767  | 47447  | K425_1497 |             |                                                                                                                                                 | U11/U12 small nuclear ribonucleoprotein 35 kDa-like protein       |
| Mdem_scaffold_0004  | 47873  | 53813  | K425_1496 |             |                                                                                                                                                 | protein tyrosine kinase domain-containing protein                 |
| Mdem_scaffold_0004  | 55469  | 57942  | K425_1495 |             |                                                                                                                                                 | conserved uncharacterized protein                                 |
| Mdem_scaffold_0004  | 58198  | 62790  | K425_1375 |             |                                                                                                                                                 | vesicular integral-membrane protein VIP36-like protein            |
| Mdem_scaffold_0004  | 63801  | 63872  | K425_1370 |             |                                                                                                                                                 | tRNA-Glu                                                          |
| Mdem_scaffold_0004  | 64451  | 68498  | K425_1376 |             |                                                                                                                                                 | wolframin-like protein                                            |
| Mdem_scaffold_0004  | 68791  | 69726  | K425_1494 |             |                                                                                                                                                 | ankyrin repeat domain-containing protein                          |
| Mdem_scaffold_0004  | 70888  | 70959  | K425_1372 |             |                                                                                                                                                 | tRNA-Glu                                                          |
| Mdem_scaffold_0004  | 71082  | 72695  | K425_1378 |             |                                                                                                                                                 | mitochondrial ribosomal protein L22                               |
| Mdem_scaffold_0004  | 72669  | 74473  | K425_1493 |             |                                                                                                                                                 | ribosomal protein L39                                             |
| Mdem_scaffold_0004  | 75984  | 86628  | K425_1377 |             |                                                                                                                                                 | lipase 3-like protein                                             |
| Mdem_scaffold_0004  | 89711  | 93208  | K425_1379 |             |                                                                                                                                                 | lipase 3-like protein                                             |
| Mdem_scaffold_0004  | 95721  | 101535 | K425_1380 |             |                                                                                                                                                 | lipase 3-like protein                                             |
| Mdem_scaffold_0004  | 105894 | 117625 | K425_1381 |             |                                                                                                                                                 | low-density lipoprotein receptor-related-like protein             |
| Mdem_scaffold_0004  | 119695 | 123776 | K425_1492 |             |                                                                                                                                                 | Sorting nexin-like protein                                        |
| Mdem_scaffold_0004  | 126150 | 128656 | K425_1491 |             |                                                                                                                                                 | Corticotropin-releasing factor-binding protein                    |
| Mdem_scaffold_0004  | 136952 | 137522 | K425_1490 |             |                                                                                                                                                 | conserved uncharacterized protein                                 |
| Mdem_scaffold_0004  | 140571 | 146006 | K425_1489 |             |                                                                                                                                                 | Armadillo/beta-catenin-like repeat-containing protein             |
| Mdem_scaffold_0004  | 147968 | 154334 | K425_1382 |             |                                                                                                                                                 | dicer2-like protein                                               |
| Mdem_scaffold_0004  | 157801 | 160213 | K425_1383 |             |                                                                                                                                                 | Proteasome subunit alpha type-1                                   |
| Mdem_scaffold_0004  | 160782 | 163644 | K425_1488 |             |                                                                                                                                                 | Lipoyl synthase, mitochondrial                                    |
| Mdem_scaffold_0004  | 163645 | 166702 | K425_1487 |             |                                                                                                                                                 | trypsin domain-containing protein                                 |
| Mdem_scaffold_0004  | 170785 | 173910 | K425_1486 |             |                                                                                                                                                 | F-box containing protein                                          |
| Mdem_scaffold_0004  | 178473 | 181437 | K425_1384 |             |                                                                                                                                                 | hypothetical protein                                              |
| Mdem_scaffold_0004  | 182223 | 187763 | K425_1385 |             |                                                                                                                                                 | Coiled-coil domain-containing protein 22-like protein             |
| Mdem_scaffold_0004  | 187783 | 189692 | K425_1485 |             |                                                                                                                                                 | Mitochondrial 28S ribosomal protein S27 domain-containing protein |
| Mdem_scaffold_0004  | 193626 | 198688 | K425_1386 |             |                                                                                                                                                 | phosphoribosylformylglycinamide synthase                          |
| Mdem_scaffold_0004  | 199833 | 200950 | K425_1387 |             |                                                                                                                                                 | KIAA1430-like protein                                             |
| Mdem_scaffold_0004  | 201881 | 205399 | K425_1388 |             | similar to GIP_L7_0080, GFP_L5_0240, GIP_L2_0090, GFP_L5_0230, GFP_L5_0070, GFP_L5_0090, GIP_L2_0100, GIP_L7_0040, GIP_L7_0010, and GFP_L5_0190 | conserved uncharacterized protein family 7                        |
| Mdem_scaffold_0004  | 208028 | 215623 | K425_1484 |             |                                                                                                                                                 | transmembrane protein 131-like protein                            |
| Mdem_scaffold_0004  | 217870 | 223911 | K425_1389 |             |                                                                                                                                                 | nucleosome assembly protein 1-like protein                        |
| Mdem_scaffold_0004  | 224725 | 229767 | K425_1390 |             |                                                                                                                                                 | apoptosis-inducing factor 1, mitochondrial-like protein           |
| Mdem_scaffold_0004  | 232035 | 234213 | K425_1482 |             |                                                                                                                                                 | Broad-minded domain-containing protein                            |
| Mdem_scaffold_0004  | 235112 | 242403 | K425_1483 |             |                                                                                                                                                 | TBC domain-containing protein kinase-like protein                 |
| Mdem_scaffold_0004  | 247413 | 247484 | K425_1371 |             |                                                                                                                                                 | tRNA-Glu                                                          |
| Mdem_scaffold_0004  | 248706 | 251103 | K425_1481 |             |                                                                                                                                                 | tex-like protein                                                  |
| Mdem_scaffold_0004  | 250633 | 252501 | K425_1391 |             |                                                                                                                                                 | structure-specific endonuclease subunit slx1-like protein         |
| Mdem_scaffold_0004  | 253187 | 256399 | K425_1392 |             |                                                                                                                                                 | ribosomal protein S30-like protein                                |
| Mdem_scaffold_0004  | 259039 | 263422 | K425_1393 |             |                                                                                                                                                 | conserved uncharacterized protein family 3                        |
| Mdem_scaffold_0004  | 265275 | 273681 | K425_1394 |             |                                                                                                                                                 | conserved uncharacterized protein family 3                        |
| Mdem_scaffold_0004  | 273733 | 275802 | K425_1480 |             |                                                                                                                                                 | cytochrome P450 domain-containing protein                         |
| Mdem_scaffold_0004  | 281432 | 286369 | K425_1479 |             |                                                                                                                                                 | ras-like protein 2-like protein                                   |
| Mdem_scaffold_0004  | 287947 | 290056 | K425_1395 |             |                                                                                                                                                 | centrin-2-like protein                                            |
| Mdem_scaffold_0004  | 290481 | 293170 | K425_1478 |             |                                                                                                                                                 | exosome complex component RRP43-like protein                      |
| Mdem_scaffold_0004  | 294032 | 296193 | K425_1396 |             |                                                                                                                                                 | Signal peptidase complex subunit 3                                |
| Mdem_scaffold_0004  | 297419 | 303180 | K425_1397 |             |                                                                                                                                                 | mediator complex subunit 25-like protein                          |
| Mdem_scaffold_0004  | 305603 | 310229 | K425_1477 |             |                                                                                                                                                 | mediator complex subunit 25-like protein                          |
| Mdem_scaffold_0004  | 310559 | 315691 | K425_1398 |             |                                                                                                                                                 | protein transport protein Sec24C-like protein                     |
| Mdem_scaffold_0004  | 317949 | 323780 | K425_1399 |             |                                                                                                                                                 | heparan-alpha-glucosaminide N-acetyltransferase-like protein      |
| Mdem_scaffold_0004  | 338137 | 355158 | K425_1476 |             |                                                                                                                                                 | glutamate receptor, ionotropic kainate 2-like protein             |
| Mdem_scaffold_0004  | 382444 | 393240 | K425_1435 |             |                                                                                                                                                 | protein spitz-like protein                                        |
| Mdem_scaffold_0004  | 400134 | 403486 | K425_1400 |             |                                                                                                                                                 | bride of sevenless-like protein                                   |
| Mdem_scaffold_0004  | 408797 | 412496 | K425_1401 |             |                                                                                                                                                 | MFS sugar transporter domain-containing protein                   |
| Mdem_scaffold_0004  | 414043 | 421025 | K425_1402 |             |                                                                                                                                                 | Dual 3',5'-cyclic-AMP and -GMP phosphodiesterase 11               |
| Mdem_scaffold_0004  | 423339 | 426041 | K425_1475 |             |                                                                                                                                                 | golgin family, subfamily A member 7-like protein                  |
| Mdem_scaffold_0004  | 426498 | 429654 | K425_1403 |             |                                                                                                                                                 | Galactoside 2-alpha-L-fucosyltransferase 3                        |
| Mdem_scaffold_0004  | 431475 | 434272 | K425_1474 |             |                                                                                                                                                 | growth arrest specific protein 8-like protein                     |
| Mdem_scaffold_0004  | 435109 | 442008 | K425_1473 |             |                                                                                                                                                 | pantothenate kinase                                               |
| Mdem_scaffold_0004  | 442219 | 444821 | K425_1404 |             |                                                                                                                                                 | serine--tRNA ligase                                               |
| Mdem_scaffold_0004  | 449637 | 453788 | K425_1472 |             |                                                                                                                                                 | growth arrest-specific protein 8-like protein                     |
| Mdem_scaffold_0004  | 454012 | 461145 | K425_1405 |             |                                                                                                                                                 | conserved uncharacterized protein                                 |
| Mdem_scaffold_0004  | 461535 | 463948 | K425_1406 |             |                                                                                                                                                 | Oxysterol-binding protein-related protein 11                      |
| Mdem_scaffold_0004  | 466342 | 471548 | K425_1471 |             | similar to hypothetical protein Cotesia conregata bracovirus CcBV_23.4, GIP_L1_00360, and GFP_L7_0430                                           | ribonuclease T2 domain-containing protein                         |
| Mdem_scaffold_0004  | 471946 | 475156 | K425_1407 |             |                                                                                                                                                 | PDZ domain-containing protein                                     |
| Mdem_scaffold_0004  | 475160 | 479405 | K425_1470 |             |                                                                                                                                                 | p53-like protein                                                  |
| Mdem_scaffold_0004  | 480840 | 483559 | K425_1469 |             |                                                                                                                                                 | putative palmitoyltransferase ZDHHC16-like protein                |

|                    |         |         |           |       |                                         |                                                                          |
|--------------------|---------|---------|-----------|-------|-----------------------------------------|--------------------------------------------------------------------------|
| Mdem_scaffold_0004 | 484112  | 486322  | K425_1408 |       |                                         | mitochondrial ribosomal protein S26                                      |
| Mdem_scaffold_0004 | 487979  | 498157  | K425_1468 |       |                                         | mothers against decapentaplegic 4-like protein                           |
| Mdem_scaffold_0004 | 500345  | 505387  | K425_1467 |       |                                         | ribonuclease T2 domain-containing protein                                |
| Mdem_scaffold_0004 | 505815  | 510115  | K425_1466 |       |                                         | ralA-binding-like protein                                                |
| Mdem_scaffold_0004 | 512973  | 517555  | K425_1409 |       |                                         | glucose dehydrogenase acceptor-like protein                              |
| Mdem_scaffold_0004 | 517186  | 525656  | K425_1465 |       |                                         | EB module-containing protein                                             |
| Mdem_scaffold_0004 | 527692  | 535446  | K425_1464 |       |                                         | EB module-containing protein                                             |
| Mdem_scaffold_0004 | 536491  | 538954  | K425_1410 |       |                                         | EB module-containing protein                                             |
| Mdem_scaffold_0004 | 540970  | 545107  | K425_1411 |       |                                         | upstream activation factor subunit spp27-like protein                    |
| Mdem_scaffold_0004 | 547362  | 553441  | K425_1412 |       |                                         | putative protein phosphatase 2C                                          |
| Mdem_scaffold_0004 | 549582  | 550675  | K425_1463 |       |                                         | hypothetical protein                                                     |
| Mdem_scaffold_0004 | 553909  | 559264  | K425_1413 |       |                                         | TAPT1-like protein                                                       |
| Mdem_scaffold_0004 | 560343  | 564064  | K425_1414 |       |                                         | GTP-binding protein 2-like protein                                       |
| Mdem_scaffold_0004 | 565321  | 569856  | K425_1462 |       |                                         | serine protease snake-like protein                                       |
| Mdem_scaffold_0004 | 570653  | 577724  | K425_1415 |       |                                         | bifunctional protein NCOAT-like protein                                  |
| Mdem_scaffold_0004 | 578167  | 582827  | K425_1461 |       |                                         | leucine-rich repeat-containing protein                                   |
| Mdem_scaffold_0004 | 586785  | 597802  | K425_1460 |       |                                         | neurotactin-like protein                                                 |
| Mdem_scaffold_0004 | 599015  | 604921  | K425_1416 |       |                                         | tankyrase-1-like protein                                                 |
| Mdem_scaffold_0004 | 611131  | 614356  | K425_1417 |       |                                         | protein phosphatase 1 regulatory subunit 3C-B-like protein               |
| Mdem_scaffold_0004 | 615131  | 617459  | K425_1459 |       |                                         | serine protease snake-like protein                                       |
| Mdem_scaffold_0004 | 620209  | 621382  | K425_1458 |       |                                         | WD repeat domain-containing protein                                      |
| Mdem_scaffold_0004 | 621722  | 625510  | K425_1418 |       |                                         | Non-specific lipid-transfer protein                                      |
| Mdem_scaffold_0004 | 625638  | 627986  | K425_1419 |       |                                         | CDC42 small effector-like protein                                        |
| Mdem_scaffold_0004 | 629085  | 632092  | K425_1457 |       |                                         | another transcription unit-like protein                                  |
| Mdem_scaffold_0004 | 635331  | 665346  | K425_1420 |       |                                         | tight junction protein ZO-1-like protein                                 |
| Mdem_scaffold_0004 | 642744  | 645310  | K425_1456 |       |                                         | MFS family sugar transporter                                             |
| Mdem_scaffold_0004 | 666544  | 669783  | K425_1421 |       |                                         | Coiled-coil and C2 domain-containing protein 2A                          |
| Mdem_scaffold_0004 | 671089  | 675610  | K425_1455 |       |                                         | elongation of very long chain fatty acids protein 4-like protein         |
| Mdem_scaffold_0004 | 686247  | 691084  | K425_1422 |       |                                         | glycine receptor subunit alpha-1-like protein                            |
| Mdem_scaffold_0004 | 691226  | 697324  | K425_1454 |       |                                         | periodic tryptophan protein 2-like protein                               |
| Mdem_scaffold_0004 | 707839  | 720776  | K425_1453 |       |                                         | eukaryotic translation initiation factor 4 gamma 2-like protein          |
| Mdem_scaffold_0004 | 721111  | 724168  | K425_1423 |       |                                         | syntaxin-12-like protein                                                 |
| Mdem_scaffold_0004 | 725723  | 735594  | K425_1452 |       |                                         | ankyrin repeat and BTB/POZ domain-containing protein BTBD11-like protein |
| Mdem_scaffold_0004 | 745662  | 752237  | K425_1424 |       |                                         | Proton-coupled amino acid transporter-like protein                       |
| Mdem_scaffold_0004 | 777615  | 785307  | K425_1425 |       |                                         | Paired box protein Pax-6-like protein                                    |
| Mdem_scaffold_0004 | 791633  | 793038  | K425_1451 |       |                                         | conserved uncharacterized protein                                        |
| Mdem_scaffold_0004 | 802342  | 804959  | K425_1426 |       |                                         | Paired box protein Pax-6-like protein                                    |
| Mdem_scaffold_0004 | 806160  | 818745  | K425_1450 |       |                                         | conserved uncharacterized protein                                        |
| Mdem_scaffold_0004 | 819353  | 840921  | K425_1427 |       |                                         | centrosomal protein of 135 kDa-like protein                              |
| Mdem_scaffold_0004 | 826536  | 830290  | K425_1449 |       |                                         | conserved uncharacterized protein                                        |
| Mdem_scaffold_0004 | 841268  | 858230  | K425_1448 |       |                                         | conserved uncharacterized protein                                        |
| Mdem_scaffold_0004 | 859232  | 862705  | K425_1428 |       |                                         | Seryl-tRNA synthetase, mitochondrial                                     |
| Mdem_scaffold_0004 | 879083  | 880323  | K425_1447 |       |                                         | Dynein heavy chain 1, axonemal-like protein                              |
| Mdem_scaffold_0004 | 886039  | 890070  | K425_1429 |       |                                         | mps one binder kinase activator-like protein 2-like protein              |
| Mdem_scaffold_0004 | 890884  | 892531  | K425_1446 |       |                                         | conserved uncharacterized protein                                        |
| Mdem_scaffold_0004 | 893910  | 898483  | K425_1445 |       |                                         | Palmitoyltransferase and ankyrin-repeat containing protein               |
| Mdem_scaffold_0004 | 928132  | 931779  | K425_1430 |       |                                         | CD80-like C2-set immunoglobulin domain-containing protein                |
| Mdem_scaffold_0004 | 939829  | 943659  | K425_1444 |       |                                         | peptidyl-prolyl cis-trans isomerase FKBP4-like protein                   |
| Mdem_scaffold_0004 | 945563  | 950360  | K425_1431 |       |                                         | squamous cell carcinoma antigen recognized by T-cells 3-like protein     |
| Mdem_scaffold_0004 | 950030  | 953021  | K425_1443 |       |                                         | conserved uncharacterized protein                                        |
| Mdem_scaffold_0004 | 956002  | 958931  | K425_1442 |       |                                         | conserved uncharacterized protein                                        |
| Mdem_scaffold_0004 | 959124  | 961704  | K425_1432 |       |                                         | zinc metalloproteinase nas-like protein                                  |
| Mdem_scaffold_0004 | 961692  | 973758  | K425_1441 |       |                                         | glucose dehydrogenase acceptor-like protein                              |
| Mdem_scaffold_0004 | 974198  | 977563  | K425_1440 | 35a-6 | Similar to <i>Chelonus inanitus</i> 35a | conserved uncharacterized protein 35a-like protein-6                     |
| Mdem_scaffold_0004 | 976602  | 982351  | K425_1439 | 35a-7 | Similar to <i>Chelonus inanitus</i> 35a | conserved uncharacterized protein 35a-like protein-7                     |
| Mdem_scaffold_0004 | 982606  | 985440  | K425_1438 |       |                                         | hypothetical protein                                                     |
| Mdem_scaffold_0004 | 986306  | 989669  | K425_1437 |       |                                         | clavesin-2-like protein                                                  |
| Mdem_scaffold_0004 | 997381  | 1003705 | K425_1433 |       |                                         | olfactory receptor                                                       |
| Mdem_scaffold_0004 | 1008583 | 1013104 | K425_1434 |       |                                         | ras-like protein family member 10B-like protein                          |
| Mdem_scaffold_0004 | 1013456 | 1014295 | K425_1436 |       |                                         | cell growth-regulating nucleolar-like protein                            |
| Mdem_scaffold_0014 | 197     | 4173    | K425_248  |       |                                         | conserved uncharacterized protein                                        |
| Mdem_scaffold_0014 | 3725    | 6022    | K425_408  |       |                                         | conserved uncharacterized protein                                        |
| Mdem_scaffold_0014 | 6577    | 11422   | K425_409  |       |                                         | putative ribosomal RNA methyltransferase-like protein                    |
| Mdem_scaffold_0014 | 16282   | 16826   | K425_407  |       |                                         | 7tm Odorant receptor domain-containing protein                           |
| Mdem_scaffold_0014 | 17127   | 18991   | K425_406  |       |                                         | 7tm Odorant receptor domain-containing protein                           |
| Mdem_scaffold_0014 | 28115   | 37269   | K425_249  |       |                                         | cln3-like protein                                                        |
| Mdem_scaffold_0014 | 38118   | 41592   | K425_405  |       |                                         | actin domain-containing protein                                          |
| Mdem_scaffold_0014 | 43020   | 80327   | K425_404  |       |                                         | Down syndrome cell adhesion molecule-like protein                        |
| Mdem_scaffold_0014 | 94540   | 94893   | K425_403  |       |                                         | Down syndrome cell adhesion molecule-like protein                        |
| Mdem_scaffold_0014 | 95599   | 98277   | K425_250  |       |                                         | hypothetical protein                                                     |
| Mdem_scaffold_0014 | 195639  | 199692  | K425_251  |       |                                         | Zinc finger, C2H2 type domain-containing protein                         |
| Mdem_scaffold_0014 | 220542  | 226059  | K425_252  |       |                                         | solute carrier family-like protein                                       |
| Mdem_scaffold_0014 | 230341  | 233934  | K425_253  |       |                                         | kelch-like protein                                                       |
| Mdem_scaffold_0014 | 232571  | 236582  | K425_402  |       |                                         | protein phosphatase methylesterase 1-like protein                        |
| Mdem_scaffold_0014 | 244250  | 248898  | K425_254  |       |                                         | Immunoglobulin domain-containing protein                                 |
| Mdem_scaffold_0014 | 252054  | 253309  | K425_401  |       |                                         | HcArG domain-containing protein                                          |
| Mdem_scaffold_0014 | 253668  | 259750  | K425_255  |       |                                         | conserved uncharacterized protein                                        |
| Mdem_scaffold_0014 | 260141  | 260946  | K425_400  |       |                                         | methyltransferase domain-containing protein                              |
| Mdem_scaffold_0014 | 272388  | 282130  | K425_399  |       |                                         | methyltransferase domain-containing protein                              |
| Mdem_scaffold_0014 | 298396  | 301457  | K425_398  |       |                                         | hypothetical protein                                                     |
| Mdem_scaffold_0014 | 314709  | 315437  | K425_397  |       |                                         | Zinc finger, C2H2 type domain-containing protein                         |
| Mdem_scaffold_0014 | 369213  | 371216  | K425_256  |       |                                         | hypothetical protein                                                     |

|                    |         |         |          |         |                                        |                                                                            |
|--------------------|---------|---------|----------|---------|----------------------------------------|----------------------------------------------------------------------------|
| Mdem_scaffold_0014 | 377853  | 390994  | K425_396 |         |                                        | zinc finger homeobox-like protein                                          |
| Mdem_scaffold_0014 | 465304  | 465753  | K425_257 |         |                                        | hypothetical protein                                                       |
| Mdem_scaffold_0014 | 638238  | 640332  | K425_258 |         |                                        | ADP-ribosylation factor 2-like protein                                     |
| Mdem_scaffold_0014 | 641759  | 645797  | K425_395 |         |                                        | conserved uncharacterized protein                                          |
| Mdem_scaffold_0014 | 647900  | 650698  | K425_259 |         |                                        | F-box domain-containing protein                                            |
| Mdem_scaffold_0014 | 650863  | 654361  | K425_394 |         |                                        | PDZ domain-containing protein 6-like protein                               |
| Mdem_scaffold_0014 | 654844  | 657791  | K425_393 |         |                                        | fizzy-like protein                                                         |
| Mdem_scaffold_0014 | 706572  | 711711  | K425_392 |         |                                        | synaptogyrin-like protein                                                  |
| Mdem_scaffold_0014 | 712215  | 715696  | K425_260 |         |                                        | RNA-binding protein squid-like protein                                     |
| Mdem_scaffold_0014 | 718722  | 725613  | K425_261 |         |                                        | Protein tyrosine kinase domain-containing protein                          |
| Mdem_scaffold_0014 | 718904  | 720780  | K425_391 |         |                                        | short-chain dehydrogenase domain-containing protein                        |
| Mdem_scaffold_0014 | 726088  | 727284  | K425_262 |         |                                        | ribosomal protein L18A                                                     |
| Mdem_scaffold_0014 | 727780  | 730274  | K425_263 |         |                                        | F-box domain-containing protein                                            |
| Mdem_scaffold_0014 | 731120  | 737560  | K425_264 |         |                                        | conserved uncharacterized protein                                          |
| Mdem_scaffold_0014 | 739210  | 742384  | K425_390 |         |                                        | Zinc finger, C2H2 type domain-containing protein                           |
| Mdem_scaffold_0014 | 742389  | 743275  | K425_265 |         |                                        | hypothetical protein                                                       |
| Mdem_scaffold_0014 | 743648  | 747468  | K425_266 |         |                                        | conserved uncharacterized protein                                          |
| Mdem_scaffold_0014 | 752856  | 762361  | K425_267 |         |                                        | Plexin cytoplasmic RasGAP domain-containing protein                        |
| Mdem_scaffold_0014 | 766535  | 774902  | K425_389 |         |                                        | integrator 12-like protein                                                 |
| Mdem_scaffold_0014 | 773062  | 781838  | K425_268 |         |                                        | conserved uncharacterized protein                                          |
| Mdem_scaffold_0014 | 782873  | 785459  | K425_388 |         |                                        | Zn-finger in Ran binding protein and others domain-containing protein      |
| Mdem_scaffold_0014 | 799108  | 801547  | K425_387 |         |                                        | Neurotransmitter-gated ion-channel transmembrane region-containing protein |
| Mdem_scaffold_0014 | 929350  | 930107  | K425_269 |         |                                        | hypothetical protein                                                       |
| Mdem_scaffold_0014 | 932620  | 933803  | K425_386 |         |                                        | Steroid receptor RNA activator (SRA1) domain-containing protein            |
| Mdem_scaffold_0014 | 935431  | 947317  | K425_270 |         |                                        | C2 domain-containing protein                                               |
| Mdem_scaffold_0014 | 947898  | 949303  | K425_385 |         |                                        | DNA/RNA non-specific endonuclease domain-containing protein                |
| Mdem_scaffold_0014 | 951228  | 951964  | K425_384 |         |                                        | myosuppressin-like protein                                                 |
| Mdem_scaffold_0014 | 963571  | 967587  | K425_271 |         |                                        | AMP-binding enzyme-like protein                                            |
| Mdem_scaffold_0014 | 967580  | 975739  | K425_383 |         |                                        | exosome complex exonuclease RRP44-like protein                             |
| Mdem_scaffold_0014 | 974813  | 978896  | K425_272 |         |                                        | nudE Nuclear distribution-like protein                                     |
| Mdem_scaffold_0014 | 982377  | 984941  | K425_382 |         |                                        | histone H3.3                                                               |
| Mdem_scaffold_0014 | 986991  | 989768  | K425_381 |         |                                        | histone H3.3                                                               |
| Mdem_scaffold_0014 | 990006  | 993493  | K425_273 |         | similar to GFP_L1_0140 and GIP_L5_0190 | smad nuclear-interacting-like protein                                      |
| Mdem_scaffold_0014 | 994802  | 1004140 | K425_380 |         | similar to GFP_L1_0120 and GIP_L5_0170 | protein tyrosine kinase                                                    |
| Mdem_scaffold_0014 | 1005656 | 1014850 | K425_379 |         |                                        | protein tyrosine kinase                                                    |
| Mdem_scaffold_0014 | 1017699 | 1019900 | K425_274 |         | similar to GFP_L1_0100 and GIP_L5_0150 | prolylcarboxypeptidase                                                     |
| Mdem_scaffold_0014 | 1020252 | 1024380 | K425_378 |         | similar to GFP_L1_0090 and GIP_L5_0140 | kinesin-like protein KIF3A                                                 |
| Mdem_scaffold_0014 | 1025619 | 1027172 | K425_377 | ank-N4  | synonym IkB-N2                         | viral ankyrin                                                              |
| Mdem_scaffold_0014 | 1029536 | 1030027 | K425_376 | ank-N5  | synonym IkB-N3                         | viral ankyrin                                                              |
| Mdem_scaffold_0014 | 1031018 | 1031953 | K425_275 | orph-N2 |                                        | hypothetical protein                                                       |
| Mdem_scaffold_0014 | 1032789 | 1033748 | K425_375 | ptp-N3  |                                        | protein tyrosine phosphatase                                               |
| Mdem_scaffold_0014 | 1034610 | 1035572 | K425_374 | ptp-N4  |                                        | protein tyrosine phosphatase                                               |
| Mdem_scaffold_0014 | 1038217 | 1038523 | K425_373 | orph-N1 |                                        | hypothetical protein                                                       |
| Mdem_scaffold_0014 | 1038613 | 1039101 | K425_372 | ank-N1  | synonym IkB-N1                         | viral ankyrin                                                              |
| Mdem_scaffold_0014 | 1039430 | 1040368 | K425_371 | ptp-N1  |                                        | protein tyrosine phosphatase                                               |
| Mdem_scaffold_0014 | 1040865 | 1041809 | K425_370 | ptp-N2  |                                        | protein tyrosine phosphatase                                               |
| Mdem_scaffold_0014 | 1047523 | 1048047 | K425_369 | ank-J4  | synonym IkB-J1                         | viral ankyrin                                                              |
| Mdem_scaffold_0014 | 1049185 | 1050078 | K425_368 | ptp-J2  |                                        | protein tyrosine phosphatase                                               |
| Mdem_scaffold_0014 | 1053924 | 1054805 | K425_366 | ptp-J3  |                                        | protein tyrosine phosphatase                                               |
| Mdem_scaffold_0014 | 1055620 | 1056519 | K425_367 | ptp-J4  |                                        | protein tyrosine phosphatase                                               |
| Mdem_scaffold_0014 | 1057637 | 1059777 | K425_276 | ptp-J1  |                                        | protein tyrosine phosphatase                                               |
| Mdem_scaffold_0014 | 1062797 | 1065193 | K425_365 |         | similar to GFP_L1_0020 and GIP_L5_0010 | conserved hypothetical protein                                             |
| Mdem_scaffold_0014 | 1068563 | 1073033 | K425_277 |         | similar to GFP_L1_0010 and GIP_L5_0020 | conserved hypothetical protein                                             |
| Mdem_scaffold_0014 | 1073707 | 1077046 | K425_278 |         | similar to GIP_L5_0010                 | ras-related protein Rab-2                                                  |
| Mdem_scaffold_0014 | 1079986 | 1085208 | K425_279 |         |                                        | sorting nexin-6-like protein                                               |
| Mdem_scaffold_0014 | 1095803 | 1101542 | K425_364 |         |                                        | Immunoglobulin domain-containing protein                                   |
| Mdem_scaffold_0014 | 1110276 | 1112678 | K425_280 |         |                                        | Mitochondrial ATP synthase B chain precursor domain-containing protein     |
| Mdem_scaffold_0014 | 1112800 | 1117695 | K425_281 |         |                                        | Adenosine deaminase-like protein                                           |
| Mdem_scaffold_0014 | 1121196 | 1130673 | K425_363 |         |                                        | dead ringer-like protein                                                   |
| Mdem_scaffold_0014 | 1175983 | 1178245 | K425_362 |         |                                        | dead ringer-like protein                                                   |
| Mdem_scaffold_0014 | 1216215 | 1220056 | K425_361 |         |                                        | Bardet-Biedl syndrome 1 protein                                            |
| Mdem_scaffold_0014 | 1218807 | 1225103 | K425_282 |         |                                        | Targeting protein for Xklp2 (TPX2) domain-containing protein               |
| Mdem_scaffold_0014 | 1222170 | 1227805 | K425_360 |         |                                        | dispatched-like protein                                                    |
| Mdem_scaffold_0014 | 1231418 | 1237614 | K425_283 |         |                                        | sodium- and chloride-dependent GABA transporter-like protein               |
| Mdem_scaffold_0014 | 1240865 | 1246393 | K425_359 |         |                                        | contactin-like protein                                                     |
| Mdem_scaffold_0014 | 1250329 | 1260118 | K425_284 |         |                                        | guanine nucleotide-binding protein subunit gamma-e-like protein            |
| Mdem_scaffold_0014 | 1275945 | 1288224 | K425_285 |         |                                        | putative chitinase                                                         |
| Mdem_scaffold_0014 | 1287714 | 1299612 | K425_358 |         |                                        | chaoptin-like protein                                                      |
| Mdem_scaffold_0014 | 1314790 | 1330869 | K425_286 |         |                                        | NADPH oxidase-like protein                                                 |
| Mdem_scaffold_0014 | 1329088 | 1339961 | K425_357 |         |                                        | Diacylglycerol kinase epsilon-like protein                                 |
| Mdem_scaffold_0014 | 1340521 | 1345389 | K425_356 |         |                                        | van gogh-like protein                                                      |
| Mdem_scaffold_0014 | 1346022 | 1349626 | K425_287 |         |                                        | Zinc finger, C2H2 type domain-containing protein                           |
| Mdem_scaffold_0014 | 1355390 | 1372447 | K425_288 |         |                                        | DNA mismatch repair protein Msh2-like protein                              |
| Mdem_scaffold_0014 | 1356138 | 1360977 | K425_355 |         |                                        | conserved uncharacterized protein                                          |
| Mdem_scaffold_0014 | 1371328 | 1375019 | K425_354 |         |                                        | ras-related protein Rab-39B-like protein                                   |

|                    |         |         |          |       |                                 |                                                                                                   |
|--------------------|---------|---------|----------|-------|---------------------------------|---------------------------------------------------------------------------------------------------|
| Mdem_scaffold_0014 | 1375197 | 1379870 | K425_353 |       |                                 | xmas-2-like protein                                                                               |
| Mdem_scaffold_0014 | 1380153 | 1382890 | K425_289 |       |                                 | sarah-like protein                                                                                |
| Mdem_scaffold_0014 | 1384646 | 1389400 | K425_352 |       |                                 | cullin-5-like protein                                                                             |
| Mdem_scaffold_0014 | 1389700 | 1392784 | K425_351 |       |                                 | endoplasmic reticulum oxidoreductin-1-like protein                                                |
| Mdem_scaffold_0014 | 1393403 | 1396693 | K425_290 |       |                                 | ubiquitin-protein ligase E3 Mdm2-like protein                                                     |
| Mdem_scaffold_0014 | 1396595 | 1399308 | K425_291 |       |                                 | prenyl protease type I-like protein                                                               |
| Mdem_scaffold_0014 | 1399411 | 1402436 | K425_350 |       |                                 | Dihydroxyacetone kinase-like protein                                                              |
| Mdem_scaffold_0014 | 1403550 | 1410734 | K425_292 |       |                                 | monocarboxylate MFS transporter 10-like protein                                                   |
| Mdem_scaffold_0014 | 1417414 | 1419316 | K425_293 |       |                                 | sine oculis-binding-like protein                                                                  |
| Mdem_scaffold_0014 | 1419691 | 1421958 | K425_349 |       |                                 | guanine nucleotide-binding protein subunit beta-like protein                                      |
| Mdem_scaffold_0014 | 1427148 | 1428835 | K425_348 |       |                                 | photoreceptor-specific nuclear receptor-like protein                                              |
| Mdem_scaffold_0014 | 1428739 | 1430583 | K425_294 |       |                                 | centrosomal protein of 78 kDa-like protein                                                        |
| Mdem_scaffold_0014 | 1431028 | 1431507 | K425_347 |       |                                 | photoreceptor-specific nuclear receptor-like protein                                              |
| Mdem_scaffold_0014 | 1432644 | 1435057 | K425_346 |       |                                 | photoreceptor-specific nuclear receptor-like protein                                              |
| Mdem_scaffold_0014 | 1437806 | 1441163 | K425_345 |       |                                 | photoreceptor-specific nuclear receptor-like protein                                              |
| Mdem_scaffold_0014 | 1442144 | 1449075 | K425_295 |       |                                 | Inhibitor of Apoptosis domain-containing protein                                                  |
| Mdem_scaffold_0014 | 1443084 | 1447710 | K425_344 |       |                                 | mediator of RNA polymerase II transcription subunit 24-like protein                               |
| Mdem_scaffold_0014 | 1450715 | 1452220 | K425_296 |       |                                 | MFS sugar transporter-like protein                                                                |
| Mdem_scaffold_0014 | 1454323 | 1461293 | K425_297 |       |                                 | ankyrin repeat containing protein                                                                 |
| Mdem_scaffold_0014 | 1461426 | 1465891 | K425_343 |       |                                 | serine/threonine-protein kinase/endoribonuclease IRE1-like protein                                |
| Mdem_scaffold_0014 | 1466250 | 1467675 | K425_298 |       |                                 | RNA exonuclease 4-like protein                                                                    |
| Mdem_scaffold_0014 | 1468713 | 1470876 | K425_299 |       |                                 | Flavin-containing monooxygenase-like protein                                                      |
| Mdem_scaffold_0014 | 1471349 | 1473619 | K425_300 |       |                                 | small glutamine-rich tetratricopeptide containing protein                                         |
| Mdem_scaffold_0014 | 1474198 | 1479593 | K425_301 |       |                                 | Ras-like GTP-binding protein Rho1-like protein                                                    |
| Mdem_scaffold_0014 | 1484140 | 1494167 | K425_342 |       |                                 | neurofibromin-like protein                                                                        |
| Mdem_scaffold_0014 | 1495565 | 1498465 | K425_341 |       |                                 | inositol-pentakisphosphate 2-kinase-like protein                                                  |
| Mdem_scaffold_0014 | 1504808 | 1505416 | K425_340 |       |                                 | BTG domain-containing protein                                                                     |
| Mdem_scaffold_0014 | 1509593 | 1512283 | K425_302 |       |                                 | hypothetical protein                                                                              |
| Mdem_scaffold_0014 | 1520152 | 1540197 | K425_303 |       |                                 | voltage-gated calcium channel alpha 1 subunit-like protein                                        |
| Mdem_scaffold_0014 | 1540309 | 1548010 | K425_304 |       |                                 | poly(A) polymerase gamma-like protein                                                             |
| Mdem_scaffold_0014 | 1540310 | 1544433 | K425_339 |       |                                 | DnaI domain-containing protein                                                                    |
| Mdem_scaffold_0014 | 1550148 | 1557592 | K425_305 |       |                                 | fibrillin-like protein                                                                            |
| Mdem_scaffold_0014 | 1557680 | 1561652 | K425_338 |       |                                 | polo-like protein                                                                                 |
| Mdem_scaffold_0014 | 1562311 | 1563926 | K425_337 |       |                                 | serine/threonine-protein kinase PLK2-like protein                                                 |
| Mdem_scaffold_0014 | 1565338 | 1569374 | K425_306 |       |                                 | pleckstrin domain-containing family M member                                                      |
| Mdem_scaffold_0014 | 1568795 | 1571338 | K425_336 |       |                                 | spindle assembly abnormal 6-like protein                                                          |
| Mdem_scaffold_0014 | 1571572 | 1573376 | K425_307 |       |                                 | UPF0760 protein C2orf29-like protein                                                              |
| Mdem_scaffold_0014 | 1573919 | 1576742 | K425_308 |       |                                 | conserved uncharacterized protein                                                                 |
| Mdem_scaffold_0014 | 1577187 | 1577927 | K425_335 |       |                                 | BTB/POZ domain-containing protein                                                                 |
| Mdem_scaffold_0014 | 1578857 | 1581465 | K425_334 |       |                                 | ATP synthase F1, delta subunit                                                                    |
| Mdem_scaffold_0014 | 1580616 | 1582735 | K425_309 |       |                                 | conserved uncharacterized protein                                                                 |
| Mdem_scaffold_0014 | 1583539 | 1587357 | K425_333 |       |                                 | Chitin binding Peritrophin-A domain-containing protein                                            |
| Mdem_scaffold_0014 | 1594411 | 1603522 | K425_310 |       |                                 | F-box domain-containing protein                                                                   |
| Mdem_scaffold_0014 | 1599992 | 1602126 | K425_332 |       |                                 | AMY-1-associating protein expressed in testis 1-like protein                                      |
| Mdem_scaffold_0014 | 1602527 | 1605044 | K425_331 |       |                                 | conserved uncharacterized protein                                                                 |
| Mdem_scaffold_0014 | 1609130 | 1611303 | K425_311 |       |                                 | thioredoxin domain-containing protein                                                             |
| Mdem_scaffold_0014 | 1616449 | 1620927 | K425_330 |       |                                 | dual specificity tyrosine-phosphorylation-regulated kinase 2-like protein                         |
| Mdem_scaffold_0014 | 1623122 | 1625614 | K425_312 |       |                                 | Autophagy-specific 8a-like protein                                                                |
| Mdem_scaffold_0014 | 1626044 | 1632321 | K425_313 |       |                                 | nuclear hormone receptor ligand-binding domain-containing protein                                 |
| Mdem_scaffold_0014 | 1633101 | 1639667 | K425_314 |       |                                 | protein tyrosine kinase domain-containing protein                                                 |
| Mdem_scaffold_0014 | 1639770 | 1641701 | K425_329 |       |                                 | cytosolic carboxypeptidase 1-like protein                                                         |
| Mdem_scaffold_0014 | 1647633 | 1651632 | K425_315 |       |                                 | conserved uncharacterized protein                                                                 |
| Mdem_scaffold_0014 | 1652213 | 1658172 | K425_328 |       |                                 | cytosolic carboxypeptidase 1-like protein                                                         |
| Mdem_scaffold_0014 | 1662791 | 1663708 | K425_316 |       |                                 | hypothetical protein                                                                              |
| Mdem_scaffold_0014 | 1664799 | 1666921 | K425_326 |       |                                 | hypothetical protein                                                                              |
| Mdem_scaffold_0014 | 1668281 | 1670554 | K425_327 |       |                                 | electron transfer flavoprotein subunit alpha, mitochondrial-like protein                          |
| Mdem_scaffold_0014 | 1671650 | 1673132 | K425_317 |       |                                 | DNA methyltransferase 1-associated protein 1-like protein                                         |
| Mdem_scaffold_0014 | 1683209 | 1693694 | K425_325 |       |                                 | K+-dependent Na+/Ca+ exchanger-like protein                                                       |
| Mdem_scaffold_0014 | 1712204 | 1733726 | K425_318 |       |                                 | chondroitin sulfate proteoglycan 4-like protein                                                   |
| Mdem_scaffold_0014 | 1736339 | 1737561 | K425_319 |       |                                 | Pre-rRNA-processing protein TSR2-like protein                                                     |
| Mdem_scaffold_0014 | 1737131 | 1741672 | K425_324 |       |                                 | Niemann-Pick type C-1-like protein                                                                |
| Mdem_scaffold_0014 | 1742985 | 1745909 | K425_320 |       |                                 | hypothetical protein                                                                              |
| Mdem_scaffold_0014 | 1745913 | 1749505 | K425_323 |       |                                 | CECR5, HAD hydrolase, TIGR01456 family                                                            |
| Mdem_scaffold_0014 | 1750646 | 1754213 | K425_321 |       |                                 | Atg14, UV radiation resistance protein and autophagy-related subunit 14 domain-containing protein |
| Mdem_scaffold_0014 | 1754066 | 1756814 | K425_322 |       |                                 | retinol dehydrogenase 11-like protein                                                             |
| Mdem_scaffold_0019 | 16721   | 17669   | K425_552 |       |                                 | conserved uncharacterized protein                                                                 |
| Mdem_scaffold_0019 | 18681   | 21180   | K425_551 |       |                                 | reverse transcriptase-like protein                                                                |
| Mdem_scaffold_0019 | 22244   | 24229   | K425_526 |       |                                 | hypothetical protein                                                                              |
| Mdem_scaffold_0019 | 27542   | 29329   | K425_527 |       |                                 | conserved uncharacterized protein                                                                 |
| Mdem_scaffold_0019 | 64422   | 65264   | K425_550 |       |                                 | gag protein from human immunodeficiency virus 1-like protein                                      |
| Mdem_scaffold_0019 | 74794   | 75531   | K425_553 |       |                                 | hypothetical protein                                                                              |
| Mdem_scaffold_0019 | 78581   | 79816   | K425_549 |       |                                 | conserved uncharacterized protein                                                                 |
| Mdem_scaffold_0019 | 84970   | 85920   | K425_548 |       |                                 | reverse transcriptase-like protein                                                                |
| Mdem_scaffold_0019 | 93164   | 94400   | K425_547 | int-2 | synonym HzNVORF144-like protein | viral integrase                                                                                   |
| Mdem_scaffold_0019 | 100850  | 102709  | K425_528 |       |                                 | conserved uncharacterized protein                                                                 |
| Mdem_scaffold_0019 | 118604  | 119401  | K425_529 |       | similar to GFP_L5_0200          | conserved uncharacterized protein                                                                 |
| Mdem_scaffold_0019 | 119668  | 121030  | K425_530 |       |                                 | hypothetical protein                                                                              |
| Mdem_scaffold_0019 | 129033  | 129359  | K425_531 |       |                                 | hypothetical protein                                                                              |
| Mdem_scaffold_0019 | 129390  | 129773  | K425_532 |       |                                 | hypothetical protein                                                                              |
| Mdem_scaffold_0019 | 130795  | 131157  | K425_533 |       |                                 | hypothetical protein                                                                              |
| Mdem_scaffold_0019 | 137002  | 139885  | K425_546 |       |                                 | hypothetical protein                                                                              |
| Mdem_scaffold_0019 | 152231  | 153091  | K425_534 |       | similar to GFP_L5_0170          | conserved uncharacterized protein                                                                 |

|                    |        |        |          |  |                                           |                                                                               |
|--------------------|--------|--------|----------|--|-------------------------------------------|-------------------------------------------------------------------------------|
| Mdem_scaffold_0019 | 166383 | 170089 | K425_545 |  |                                           | 120.7 kDa protein in NOF-FB transposable element-like protein                 |
| Mdem_scaffold_0019 | 183576 | 183956 | K425_535 |  |                                           | hypothetical protein                                                          |
| Mdem_scaffold_0019 | 225326 | 226144 | K425_544 |  | similar to GFP_L5_0170                    | conserved uncharacterized protein family 1                                    |
| Mdem_scaffold_0019 | 229942 | 231068 | K425_536 |  |                                           | hypothetical protein                                                          |
| Mdem_scaffold_0019 | 231421 | 232250 | K425_537 |  |                                           | hypothetical protein                                                          |
| Mdem_scaffold_0019 | 232399 | 233043 | K425_538 |  |                                           | hypothetical protein                                                          |
| Mdem_scaffold_0019 | 240043 | 241119 | K425_539 |  |                                           | retroviral aspartyl protease domain-containing protein                        |
| Mdem_scaffold_0019 | 242542 | 243765 | K425_540 |  |                                           | hypothetical protein                                                          |
| Mdem_scaffold_0019 | 248595 | 249749 | K425_541 |  | present in baculovirus and insect genomes | baculovirus envelope protein efp-like protein                                 |
| Mdem_scaffold_0019 | 250127 | 250477 | K425_542 |  |                                           | hypothetical protein                                                          |
| Mdem_scaffold_0019 | 250706 | 253635 | K425_543 |  |                                           | hypothetical protein                                                          |
| Mdem_scaffold_0025 | 2974   | 12501  | K425_602 |  |                                           | anoctamin-4-like protein                                                      |
| Mdem_scaffold_0025 | 16611  | 32384  | K425_749 |  |                                           | Son of sevenless-like protein                                                 |
| Mdem_scaffold_0025 | 30972  | 39331  | K425_603 |  |                                           | bric-a-brac-like protein                                                      |
| Mdem_scaffold_0025 | 44714  | 49090  | K425_604 |  |                                           | Zinc finger, C2H2 type domain-containing protein                              |
| Mdem_scaffold_0025 | 55746  | 57965  | K425_748 |  |                                           | conserved uncharacterized protein                                             |
| Mdem_scaffold_0025 | 60426  | 65031  | K425_747 |  |                                           | conserved uncharacterized protein                                             |
| Mdem_scaffold_0025 | 66830  | 67578  | K425_605 |  |                                           | conserved uncharacterized protein                                             |
| Mdem_scaffold_0025 | 103589 | 115476 | K425_606 |  |                                           | protein tyrosine kinase domain-containing protein                             |
| Mdem_scaffold_0025 | 116354 | 118422 | K425_607 |  |                                           | hypothetical protein                                                          |
| Mdem_scaffold_0025 | 123783 | 130512 | K425_746 |  |                                           | Alpha-N-acetylglucosaminidase                                                 |
| Mdem_scaffold_0025 | 131009 | 135474 | K425_745 |  |                                           | Endoribonuclease XendoU domain-containing protein                             |
| Mdem_scaffold_0025 | 137440 | 140155 | K425_608 |  |                                           | conserved uncharacterized protein                                             |
| Mdem_scaffold_0025 | 140305 | 156371 | K425_744 |  |                                           | Haloacid dehalogenase-like hydrolase domain-containing protein                |
| Mdem_scaffold_0025 | 182282 | 192990 | K425_743 |  |                                           | protein kinase C-binding NELL1-like protein                                   |
| Mdem_scaffold_0025 | 261708 | 266677 | K425_742 |  |                                           | conserved uncharacterized protein                                             |
| Mdem_scaffold_0025 | 266233 | 279332 | K425_609 |  |                                           | transporter, solute:sodium symporter (SSS) family                             |
| Mdem_scaffold_0025 | 289265 | 299509 | K425_741 |  |                                           | period-like protein                                                           |
| Mdem_scaffold_0025 | 316237 | 321868 | K425_740 |  |                                           | RNA-binding protein 45-like protein                                           |
| Mdem_scaffold_0025 | 323356 | 333827 | K425_610 |  |                                           | procollagen lysyl hydroxylase-like protein                                    |
| Mdem_scaffold_0025 | 326963 | 327951 | K425_739 |  |                                           | hemimentin-1-like protein                                                     |
| Mdem_scaffold_0025 | 329264 | 330672 | K425_738 |  |                                           | contactin-5-like protein                                                      |
| Mdem_scaffold_0025 | 335196 | 339602 | K425_737 |  |                                           | modifier of rudimentary-like protein                                          |
| Mdem_scaffold_0025 | 342141 | 343587 | K425_736 |  |                                           | NEDD4 family-interacting-like protein                                         |
| Mdem_scaffold_0025 | 345705 | 351552 | K425_611 |  |                                           | PWWP domain-containing protein                                                |
| Mdem_scaffold_0025 | 362296 | 369986 | K425_735 |  |                                           | leucine-rich repeat and immunoglobulin-like protein domain-containing protein |
| Mdem_scaffold_0025 | 372275 | 374245 | K425_612 |  |                                           | Nuclear protein NP60-like protein                                             |
| Mdem_scaffold_0025 | 401778 | 427927 | K425_613 |  |                                           | lilliputian-like protein                                                      |
| Mdem_scaffold_0025 | 447201 | 455641 | K425_614 |  |                                           | conserved uncharacterized protein                                             |
| Mdem_scaffold_0025 | 458587 | 463227 | K425_615 |  |                                           | conserved uncharacterized protein                                             |
| Mdem_scaffold_0025 | 466726 | 468857 | K425_734 |  |                                           | glucosidase 2 subunit beta-like protein                                       |
| Mdem_scaffold_0025 | 469211 | 472015 | K425_616 |  |                                           | protein tumorous imaginal disc, mitochondrial-like protein                    |
| Mdem_scaffold_0025 | 472912 | 475386 | K425_733 |  |                                           | ion channel domain-containing protein                                         |
| Mdem_scaffold_0025 | 476673 | 480187 | K425_617 |  |                                           | N-acetyllactosaminide beta-1,3-N-acetylglucosaminyltransferase-like protein   |
| Mdem_scaffold_0025 | 480466 | 486114 | K425_732 |  |                                           | wee-like protein kinase-like protein                                          |
| Mdem_scaffold_0025 | 485932 | 487982 | K425_618 |  |                                           | prenylated Rab acceptor protein 1-like protein                                |
| Mdem_scaffold_0025 | 488474 | 493577 | K425_619 |  |                                           | anoctamin-1-like protein                                                      |
| Mdem_scaffold_0025 | 494275 | 496658 | K425_622 |  |                                           | 60S ribosomal export protein NMD3                                             |
| Mdem_scaffold_0025 | 497109 | 499713 | K425_621 |  |                                           | sorting and assembly machinery component 50-like protein                      |
| Mdem_scaffold_0025 | 500059 | 503593 | K425_620 |  |                                           | Protein phosphatase 1 regulatory subunit-like protein                         |
| Mdem_scaffold_0025 | 507040 | 508812 | K425_623 |  |                                           | conserved uncharacterized protein                                             |
| Mdem_scaffold_0025 | 514247 | 515675 | K425_624 |  |                                           | myotrophin-like protein                                                       |
| Mdem_scaffold_0025 | 515089 | 521002 | K425_731 |  |                                           | histone-lysine N-methyltransferase SET-like protein                           |
| Mdem_scaffold_0025 | 520700 | 523893 | K425_625 |  |                                           | WD40 repeat-containing protein SMU1-like protein                              |
| Mdem_scaffold_0025 | 523907 | 528025 | K425_730 |  |                                           | potassium channel subfamily K-like protein                                    |
| Mdem_scaffold_0025 | 529789 | 532637 | K425_729 |  |                                           | potassium channel subfamily K-like protein                                    |
| Mdem_scaffold_0025 | 532856 | 536671 | K425_728 |  |                                           | potassium channel subfamily K-like protein                                    |
| Mdem_scaffold_0025 | 536797 | 542078 | K425_727 |  |                                           | conserved uncharacterized protein                                             |
| Mdem_scaffold_0025 | 545828 | 547968 | K425_626 |  |                                           | RNA polymerase II subunit A C-terminal domain phosphatase SSU72-like protein  |
| Mdem_scaffold_0025 | 548000 | 550937 | K425_726 |  |                                           | large subunit GTPase 1-like protein                                           |
| Mdem_scaffold_0025 | 551320 | 558963 | K425_725 |  |                                           | conserved uncharacterized protein                                             |
| Mdem_scaffold_0025 | 557715 | 562110 | K425_627 |  |                                           | ras-related protein Rab-18-like protein                                       |
| Mdem_scaffold_0025 | 561603 | 565044 | K425_724 |  |                                           | protein RCC2-like protein                                                     |
| Mdem_scaffold_0025 | 567029 | 568381 | K425_723 |  |                                           | mpv17-like protein 2-like protein                                             |
| Mdem_scaffold_0025 | 568908 | 570060 | K425_722 |  |                                           | 60S ribosomal protein L37                                                     |
| Mdem_scaffold_0025 | 570073 | 572232 | K425_720 |  |                                           | Translation initiation factor eIF-2B subunit gamma                            |
| Mdem_scaffold_0025 | 572347 | 574284 | K425_721 |  |                                           | aspartylglucosaminidase precursor-like protein                                |
| Mdem_scaffold_0025 | 574021 | 582301 | K425_719 |  |                                           | replication protein A 70 kDa DNA-binding subunit-like protein                 |
| Mdem_scaffold_0025 | 579013 | 585320 | K425_629 |  |                                           | WD-repeat containing protein                                                  |
| Mdem_scaffold_0025 | 585655 | 591733 | K425_718 |  |                                           | SNAP receptor complex member-like protein                                     |
| Mdem_scaffold_0025 | 585902 | 587281 | K425_628 |  |                                           | tRNA (adenine-N(1))-methyltransferase non-catalytic subunit TRM6-like protein |
| Mdem_scaffold_0025 | 590667 | 594770 | K425_630 |  |                                           | N-lysine methyltransferase SET-like protein                                   |
| Mdem_scaffold_0025 | 595187 | 602798 | K425_631 |  |                                           | conserved uncharacterized protein                                             |
| Mdem_scaffold_0025 | 603310 | 606199 | K425_632 |  |                                           | DEAD-box helicase Dbp80-like protein                                          |
| Mdem_scaffold_0025 | 606188 | 609316 | K425_717 |  |                                           | chaperonin GroL                                                               |
| Mdem_scaffold_0025 | 609403 | 610753 | K425_633 |  |                                           | 10 kDa heat shock protein, mitochondrial-like protein                         |
| Mdem_scaffold_0025 | 610741 | 612518 | K425_716 |  |                                           | something about silencing protein 10-like protein                             |
| Mdem_scaffold_0025 | 615550 | 617876 | K425_634 |  |                                           | mitochondrial ribosomal protein L20                                           |

|                    |         |         |          |        |  |                                                                             |
|--------------------|---------|---------|----------|--------|--|-----------------------------------------------------------------------------|
| Mdem_scaffold_0025 | 617266  | 618920  | K425_715 |        |  | triose-phosphate isomerase                                                  |
| Mdem_scaffold_0025 | 618904  | 620152  | K425_635 |        |  | INO80 complex subunit C-like protein                                        |
| Mdem_scaffold_0025 | 620831  | 622895  | K425_714 |        |  | protein wos2-like protein                                                   |
| Mdem_scaffold_0025 | 634745  | 645631  | K425_636 |        |  | nostrin-like protein                                                        |
| Mdem_scaffold_0025 | 645632  | 647505  | K425_712 |        |  | lipase domain-containing protein                                            |
| Mdem_scaffold_0025 | 647832  | 651964  | K425_713 |        |  | exosome component 10-like protein                                           |
| Mdem_scaffold_0025 | 648502  | 653194  | K425_637 |        |  | protein canopy-1-like protein                                               |
| Mdem_scaffold_0025 | 652830  | 656081  | K425_711 |        |  | GPI transamidase component PIG-T-like protein                               |
| Mdem_scaffold_0025 | 662191  | 670135  | K425_710 |        |  | TAR DNA-binding protein 43-like protein                                     |
| Mdem_scaffold_0025 | 670315  | 675487  | K425_709 |        |  | NLS-binding and DNA-binding and dimerization domain-containing protein      |
| Mdem_scaffold_0025 | 677098  | 679300  | K425_708 |        |  | heat shock 70 kDa-like protein                                              |
| Mdem_scaffold_0025 | 704178  | 723207  | K425_638 |        |  | conserved uncharacterized protein                                           |
| Mdem_scaffold_0025 | 725469  | 742098  | K425_707 |        |  | transporter, solute:sodium symporter (SSS) family                           |
| Mdem_scaffold_0025 | 742754  | 746182  | K425_639 |        |  | Coatomer subunit gamma-2                                                    |
| Mdem_scaffold_0025 | 746681  | 749002  | K425_640 |        |  | methionine aminopeptidase, type II                                          |
| Mdem_scaffold_0025 | 750611  | 752955  | K425_706 |        |  | conserved uncharacterized protein                                           |
| Mdem_scaffold_0025 | 765700  | 768062  | K425_705 |        |  | hypothetical protein                                                        |
| Mdem_scaffold_0025 | 768237  | 770743  | K425_641 |        |  | dihydrolipoyl dehydrogenase                                                 |
| Mdem_scaffold_0025 | 771575  | 775897  | K425_642 |        |  | dedicator of cytokinesis protein 3-like protein                             |
| Mdem_scaffold_0025 | 776901  | 780838  | K425_704 |        |  | Innexin inx3                                                                |
| Mdem_scaffold_0025 | 788374  | 795421  | K425_643 |        |  | dedicator of cytokinesis protein 3-like protein                             |
| Mdem_scaffold_0025 | 796272  | 806982  | K425_703 |        |  | protocadherin-like protein wing polarity protein stan-like protein          |
| Mdem_scaffold_0025 | 812452  | 814891  | K425_644 |        |  | conserved uncharacterized protein                                           |
| Mdem_scaffold_0025 | 812599  | 820387  | K425_702 |        |  | zinc transporter 9-like protein                                             |
| Mdem_scaffold_0025 | 815141  | 816001  | K425_645 |        |  | conserved uncharacterized protein                                           |
| Mdem_scaffold_0025 | 820904  | 824543  | K425_701 |        |  | Tudor domain-containing protein                                             |
| Mdem_scaffold_0025 | 832142  | 838071  | K425_646 |        |  | tetraspanin-11-like protein                                                 |
| Mdem_scaffold_0025 | 840448  | 842318  | K425_647 |        |  | conserved uncharacterized protein                                           |
| Mdem_scaffold_0025 | 842295  | 844205  | K425_700 |        |  | putative enoyl-CoA hydratase, mitochondrial-like protein                    |
| Mdem_scaffold_0025 | 844893  | 847111  | K425_648 |        |  | putative oxidoreductase yrBE-like protein                                   |
| Mdem_scaffold_0025 | 847106  | 849961  | K425_699 |        |  | protein DD11 2-like protein                                                 |
| Mdem_scaffold_0025 | 850608  | 853437  | K425_649 |        |  | N-acetylglucosamine-1-phosphotransferase subunits alpha/beta-like protein   |
| Mdem_scaffold_0025 | 853672  | 855420  | K425_698 |        |  | conserved uncharacterized protein                                           |
| Mdem_scaffold_0025 | 856519  | 860092  | K425_650 |        |  | chromatin-remodeling complex ATPase chain Iswi-like protein                 |
| Mdem_scaffold_0025 | 863009  | 864761  | K425_697 |        |  | CUE domain-containing protein                                               |
| Mdem_scaffold_0025 | 868043  | 869132  | K425_651 |        |  | conserved uncharacterized protein                                           |
| Mdem_scaffold_0025 | 870017  | 872298  | K425_652 |        |  | hemolymph juvenile hormone binding protein (JHBP) domain-containing protein |
| Mdem_scaffold_0025 | 875199  | 893722  | K425_696 |        |  | amyloid beta A4 precursor protein-binding family B member 2-like isoform 2  |
| Mdem_scaffold_0025 | 905053  | 906600  | K425_653 |        |  | cytochrome P450 domain-containing protein                                   |
| Mdem_scaffold_0025 | 918198  | 924532  | K425_695 |        |  | ubiquitin thioesterase trabd-like protein                                   |
| Mdem_scaffold_0025 | 921066  | 923455  | K425_655 |        |  | hypothetical protein                                                        |
| Mdem_scaffold_0025 | 924544  | 927304  | K425_654 |        |  | DNA-directed RNA polymerase III subunit RPC3-like protein                   |
| Mdem_scaffold_0025 | 927895  | 932831  | K425_656 |        |  | protein shuttle craft-like protein                                          |
| Mdem_scaffold_0025 | 936252  | 939997  | K425_694 |        |  | conserved uncharacterized protein                                           |
| Mdem_scaffold_0025 | 941287  | 945328  | K425_693 |        |  | Ribonuclease P protein subunit p20                                          |
| Mdem_scaffold_0025 | 942682  | 945176  | K425_657 |        |  | Cleavage stimulation factor 50 kDa subunit                                  |
| Mdem_scaffold_0025 | 945643  | 948564  | K425_659 |        |  | conserved uncharacterized protein                                           |
| Mdem_scaffold_0025 | 947143  | 951044  | K425_692 |        |  | DNA-directed RNA polymerase II subunit RPB9                                 |
| Mdem_scaffold_0025 | 953427  | 955073  | K425_658 |        |  | bric-a-brac-like protein                                                    |
| Mdem_scaffold_0025 | 962212  | 965357  | K425_660 |        |  | ankyrin-repeat containing protein                                           |
| Mdem_scaffold_0025 | 965871  | 968028  | K425_661 |        |  | NADH dehydrogenase (quinone), D subunit                                     |
| Mdem_scaffold_0025 | 985443  | 993999  | K425_662 |        |  | scavenger receptor class B member-like protein                              |
| Mdem_scaffold_0025 | 987291  | 990647  | K425_691 |        |  | putative reverse transcriptase                                              |
| Mdem_scaffold_0025 | 995084  | 997247  | K425_690 |        |  | scavenger receptor class B member-like protein                              |
| Mdem_scaffold_0025 | 999204  | 1002763 | K425_663 |        |  | ankyrin-repeat containing protein                                           |
| Mdem_scaffold_0025 | 1004225 | 1008076 | K425_664 |        |  | DNA-binding protein Ets97D-like protein                                     |
| Mdem_scaffold_0025 | 1039265 | 1051290 | K425_689 |        |  | Ubiquitin carboxyl-terminal hydrolase 2-like protein                        |
| Mdem_scaffold_0025 | 1052447 | 1057547 | K425_688 |        |  | protein RRP5-like protein                                                   |
| Mdem_scaffold_0025 | 1058387 | 1061616 | K425_665 |        |  | hypothetical protein                                                        |
| Mdem_scaffold_0025 | 1087446 | 1087518 | K425_601 |        |  | tRNA-Arg                                                                    |
| Mdem_scaffold_0025 | 1088392 | 1095373 | K425_666 |        |  | calpain-D-like protein                                                      |
| Mdem_scaffold_0025 | 1092653 | 1093186 | K425_687 |        |  | hypothetical protein                                                        |
| Mdem_scaffold_0025 | 1100780 | 1103368 | K425_667 |        |  | ring box protein                                                            |
| Mdem_scaffold_0025 | 1106591 | 1110631 | K425_686 |        |  | otopetrin-3-like protein                                                    |
| Mdem_scaffold_0025 | 1145659 | 1153635 | K425_685 |        |  | conserved uncharacterized protein                                           |
| Mdem_scaffold_0025 | 1207355 | 1208673 | K425_684 |        |  | ankyrin-repeat containing protein                                           |
| Mdem_scaffold_0025 | 1225438 | 1228427 | K425_683 |        |  | EB module-containing protein                                                |
| Mdem_scaffold_0025 | 1277456 | 1289141 | K425_668 |        |  | zeta-sarcoglycan-like protein                                               |
| Mdem_scaffold_0025 | 1302954 | 1304844 | K425_682 |        |  | prostaglandin reductase 1-like protein                                      |
| Mdem_scaffold_0025 | 1305694 | 1312160 | K425_681 |        |  | rapamycin-insensitive companion of mTOR-like protein                        |
| Mdem_scaffold_0025 | 1314117 | 1315067 | K425_680 | ptp-U1 |  | protein tyrosine phosphatase                                                |
| Mdem_scaffold_0025 | 1316816 | 1317748 | K425_679 | ptp-U2 |  | protein tyrosine phosphatase                                                |
| Mdem_scaffold_0025 | 1320563 | 1324187 | K425_669 |        |  | cell cycle checkpoint protein RAD1-like protein                             |
| Mdem_scaffold_0025 | 1325074 | 1330227 | K425_678 |        |  | SH2B adapter protein 1-like protein                                         |
| Mdem_scaffold_0025 | 1329169 | 1331636 | K425_671 |        |  | conserved uncharacterized protein                                           |
| Mdem_scaffold_0025 | 1331840 | 1340593 | K425_670 |        |  | Phosphatidylinositol 4-kinase alpha                                         |
| Mdem_scaffold_0025 | 1340709 | 1343558 | K425_676 |        |  | NTF2-related export-like protein                                            |
| Mdem_scaffold_0025 | 1343191 | 1345423 | K425_672 |        |  | asparagine-linked glycosylation-like protein                                |
| Mdem_scaffold_0025 | 1345493 | 1347532 | K425_675 |        |  | RNA 3'-phosphate cyclase                                                    |

|                    |         |         |           |         |                                                              |                                                                            |
|--------------------|---------|---------|-----------|---------|--------------------------------------------------------------|----------------------------------------------------------------------------|
| Mdem_scaffold_0025 | 1347429 | 1348652 | K425_673  |         |                                                              | vacuolar-sorting protein SNF8                                              |
| Mdem_scaffold_0025 | 1348562 | 1351220 | K425_677  |         |                                                              | sodium channel and clathrin linker 1-like protein                          |
| Mdem_scaffold_0025 | 1391028 | 1399435 | K425_674  |         |                                                              | synaptotagmin-C-like protein                                               |
| Mdem_scaffold_0040 | 4557    | 6287    | K425_1313 |         |                                                              | Akt1-like protein, partial                                                 |
| Mdem_scaffold_0040 | 9790    | 11232   | K425_1312 |         |                                                              | mitochondrial ribosomal protein S28                                        |
| Mdem_scaffold_0040 | 11491   | 12686   | K425_1311 |         |                                                              | cytochrome b5 type B-like protein                                          |
| Mdem_scaffold_0040 | 19261   | 41523   | K425_1225 |         |                                                              | MORN repeat-containing protein                                             |
| Mdem_scaffold_0040 | 55713   | 79215   | K425_1226 |         |                                                              | Autophagy-related protein 11 domain-containing protein                     |
| Mdem_scaffold_0040 | 83757   | 87973   | K425_1310 |         |                                                              | TRAF-interacting-like protein                                              |
| Mdem_scaffold_0040 | 88202   | 94729   | K425_1227 |         |                                                              | caspase-8-like protein                                                     |
| Mdem_scaffold_0040 | 96094   | 100604  | K425_1309 |         |                                                              | nicalin-1-like protein                                                     |
| Mdem_scaffold_0040 | 100025  | 102372  | K425_1228 |         |                                                              | activator of basal transcription 1-like protein                            |
| Mdem_scaffold_0040 | 102847  | 106508  | K425_1308 |         |                                                              | trimeric intracellular cation channel-like protein                         |
| Mdem_scaffold_0040 | 113351  | 120787  | K425_1229 |         | similar to venom protein 2 from <i>Microctonus hyperodae</i> | conserved uncharacterized protein family 3                                 |
| Mdem_scaffold_0040 | 124391  | 134511  | K425_1230 |         | similar to venom protein 2 from <i>Microctonus hyperodae</i> | conserved uncharacterized protein family 3                                 |
| Mdem_scaffold_0040 | 137920  | 144554  | K425_1231 |         |                                                              | conserved uncharacterized protein family 3                                 |
| Mdem_scaffold_0040 | 148198  | 151849  | K425_1232 |         |                                                              | S-methyl-5'-thioadenosine phosphorylase-like protein                       |
| Mdem_scaffold_0040 | 152430  | 159752  | K425_1307 |         |                                                              | S-methyl-5'-thioadenosine phosphorylase-like protein                       |
| Mdem_scaffold_0040 | 168629  | 169587  | K425_1306 |         |                                                              | S-methyl-5'-thioadenosine phosphorylase-like protein                       |
| Mdem_scaffold_0040 | 172288  | 174731  | K425_1233 |         |                                                              | mannose-1-phosphate guanyltransferase alpha-like protein                   |
| Mdem_scaffold_0040 | 178084  | 190618  | K425_1234 |         |                                                              | XK-related protein 7-like protein                                          |
| Mdem_scaffold_0040 | 253175  | 256782  | K425_1235 |         |                                                              | protein msta-like protein                                                  |
| Mdem_scaffold_0040 | 258087  | 262087  | K425_1236 |         |                                                              | Zinc-finger C2H2 domain-containing protein                                 |
| Mdem_scaffold_0040 | 263985  | 266962  | K425_1237 |         |                                                              | Synaptic glycoprotein SC2                                                  |
| Mdem_scaffold_0040 | 266960  | 270370  | K425_1305 |         |                                                              | WD repeat-containing protein 65-like protein                               |
| Mdem_scaffold_0040 | 269760  | 283894  | K425_1238 |         |                                                              | WD repeat-containing protein                                               |
| Mdem_scaffold_0040 | 284771  | 288908  | K425_1304 |         |                                                              | TATA binding protein                                                       |
| Mdem_scaffold_0040 | 288927  | 291487  | K425_1303 |         |                                                              | mTERF domain-containing protein 1, mitochondrial                           |
| Mdem_scaffold_0040 | 293359  | 298484  | K425_1239 |         |                                                              | reactive oxygen species modulator 1-like protein                           |
| Mdem_scaffold_0040 | 296633  | 302764  | K425_1302 |         |                                                              | intermediate compartment protein 3-like protein                            |
| Mdem_scaffold_0040 | 303780  | 305728  | K425_1240 |         |                                                              | tRNA selenocysteine 1-associated protein 1-like protein                    |
| Mdem_scaffold_0040 | 306387  | 307600  | K425_1301 |         |                                                              | mitochondrial ribosomal protein L18                                        |
| Mdem_scaffold_0040 | 308219  | 311109  | K425_1241 |         |                                                              | TRAF-interacting-like protein                                              |
| Mdem_scaffold_0040 | 312402  | 314767  | K425_1300 |         |                                                              | GDP-mannose 4,6-dehydratase                                                |
| Mdem_scaffold_0040 | 317771  | 324812  | K425_1242 |         |                                                              | conserved uncharacterized protein                                          |
| Mdem_scaffold_0040 | 355902  | 357762  | K425_1244 |         |                                                              | rho GTPase-activating protein 1-like protein                               |
| Mdem_scaffold_0040 | 360418  | 364942  | K425_1245 |         |                                                              | rho GTPase-activating protein 1-like protein                               |
| Mdem_scaffold_0040 | 365287  | 368617  | K425_1299 |         |                                                              | Ras-related protein Rab-21                                                 |
| Mdem_scaffold_0040 | 369276  | 374558  | K425_1246 |         |                                                              | conserved uncharacterized protein                                          |
| Mdem_scaffold_0040 | 381961  | 383715  | K425_1247 |         |                                                              | rhythmically expressed 2-like protein                                      |
| Mdem_scaffold_0040 | 384894  | 398572  | K425_1248 |         |                                                              | laminin subunit gamma-1-like protein                                       |
| Mdem_scaffold_0040 | 400965  | 407136  | K425_1298 |         |                                                              | syntaxin-like protein                                                      |
| Mdem_scaffold_0040 | 410753  | 420739  | K425_1249 |         |                                                              | myelin expression factor 2-like protein                                    |
| Mdem_scaffold_0040 | 423806  | 441418  | K425_1297 |         |                                                              | Protein fem-1-like protein CG6966                                          |
| Mdem_scaffold_0040 | 447221  | 485453  | K425_1250 |         |                                                              | protein groucho-like protein                                               |
| Mdem_scaffold_0040 | 493737  | 505855  | K425_1296 |         |                                                              | Integrator complex subunit 3-like protein                                  |
| Mdem_scaffold_0040 | 508194  | 509386  | K425_1251 |         |                                                              | Phosphatidylinositol-specific phospholipase C, X domain-like protein       |
| Mdem_scaffold_0040 | 508241  | 519580  | K425_1295 |         |                                                              | phosphatidylinositol 3-kinase catalytic subunit type 3-like protein        |
| Mdem_scaffold_0040 | 522045  | 529980  | K425_1252 |         |                                                              | dnaj subfamily C member 10-like protein                                    |
| Mdem_scaffold_0040 | 530566  | 535043  | K425_1294 |         |                                                              | putative achaete scute target 1-like protein                               |
| Mdem_scaffold_0040 | 538450  | 546975  | K425_1293 |         |                                                              | acid phosphatase-like protein                                              |
| Mdem_scaffold_0040 | 584755  | 588057  | K425_1253 |         |                                                              | serine--tRNA ligase                                                        |
| Mdem_scaffold_0040 | 588723  | 593641  | K425_1272 |         |                                                              | disintegrin and metalloprotease-like protein                               |
| Mdem_scaffold_0040 | 593817  | 599502  | K425_1273 |         |                                                              | disintegrin and metalloprotease-like protein                               |
| Mdem_scaffold_0040 | 602292  | 609398  | K425_1274 |         |                                                              | disintegrin and metalloprotease-like protein                               |
| Mdem_scaffold_0040 | 609399  | 619668  | K425_1275 |         |                                                              | disintegrin and metalloprotease-like protein                               |
| Mdem_scaffold_0040 | 619809  | 620651  | K425_1254 |         |                                                              | disintegrin and metalloprotease-like protein                               |
| Mdem_scaffold_0040 | 623123  | 626526  | K425_1255 |         |                                                              | disintegrin and metalloprotease-like protein                               |
| Mdem_scaffold_0040 | 635173  | 636665  | K425_1292 |         |                                                              | Phosphatidylinositol-specific phospholipase C, X domain-containing protein |
| Mdem_scaffold_0040 | 642281  | 649253  | K425_1256 |         |                                                              | conserved uncharacterized protein family 3                                 |
| Mdem_scaffold_0040 | 655554  | 660345  | K425_1257 |         |                                                              | conserved uncharacterized protein family 3                                 |
| Mdem_scaffold_0040 | 661839  | 666698  | K425_1258 |         |                                                              | Phosphatidylinositol-specific phospholipase C, X domain-containing protein |
| Mdem_scaffold_0040 | 668684  | 670827  | K425_1291 |         |                                                              | conserved uncharacterized protein family 3                                 |
| Mdem_scaffold_0040 | 674513  | 675505  | K425_1290 |         |                                                              | Phosphatidylinositol-specific phospholipase C, X domain-like protein       |
| Mdem_scaffold_0040 | 676584  | 677582  | K425_1259 |         |                                                              | Phosphatidylinositol-specific phospholipase C, X domain-like protein       |
| Mdem_scaffold_0040 | 683158  | 684174  | K425_1289 |         |                                                              | Phosphatidylinositol-specific phospholipase C, X domain-like protein       |
| Mdem_scaffold_0040 | 686206  | 687675  | K425_1288 |         |                                                              | Phosphatidylinositol-specific phospholipase C, X domain-like protein       |
| Mdem_scaffold_0040 | 687785  | 690642  | K425_1287 |         |                                                              | Dnaj-like protein subfamily C member 17-like protein                       |
| Mdem_scaffold_0040 | 693842  | 695701  | K425_1260 | pif-5-2 | synonym odv-e56                                              | putative envelope protein ODV-E56-2                                        |
| Mdem_scaffold_0040 | 696993  | 698622  | K425_1261 | pif-5-3 | synonym odv-e56                                              | putative envelope protein ODV-E56-3                                        |
| Mdem_scaffold_0040 | 746474  | 752819  | K425_1262 |         |                                                              | conserved uncharacterized protein                                          |
| Mdem_scaffold_0040 | 754153  | 758298  | K425_1286 |         |                                                              | BTB/POZ domain-containing protein 2-like protein                           |
| Mdem_scaffold_0040 | 758441  | 765090  | K425_1263 |         |                                                              | rab3 GTPase-activating protein non-catalytic subunit-like protein          |
| Mdem_scaffold_0040 | 765800  | 768221  | K425_1284 |         |                                                              | acylphosphatase-2-like protein                                             |
| Mdem_scaffold_0040 | 769459  | 779216  | K425_1285 |         |                                                              | conserved uncharacterized protein                                          |
| Mdem_scaffold_0040 | 784487  | 789236  | K425_1283 |         |                                                              | PCTP-like protein                                                          |
| Mdem_scaffold_0040 | 790391  | 799294  | K425_1264 |         |                                                              | phosphoglucomutase-2-like protein                                          |
| Mdem_scaffold_0040 | 798139  | 804196  | K425_1282 |         |                                                              | conserved uncharacterized protein                                          |
| Mdem_scaffold_0040 | 806534  | 813504  | K425_1265 |         |                                                              | kinesin-like protein KIF11                                                 |

|                           |               |               |                  |                   |                                                         |                                                                                   |
|---------------------------|---------------|---------------|------------------|-------------------|---------------------------------------------------------|-----------------------------------------------------------------------------------|
| Mdem_scaffold_0040        | 813753        | 820142        | K425_1281        |                   |                                                         | trypsin-like protein                                                              |
| Mdem_scaffold_0040        | 820784        | 822293        | K425_1266        |                   |                                                         | conserved uncharacterized protein                                                 |
| Mdem_scaffold_0040        | 821581        | 827263        | K425_1280        |                   |                                                         | Annexin-B9                                                                        |
| Mdem_scaffold_0040        | 828463        | 831272        | K425_1267        |                   |                                                         | Transmembrane protein 70-like protein                                             |
| Mdem_scaffold_0040        | 831257        | 846014        | K425_1279        |                   |                                                         | ankyrin-repeat domain-containing protein                                          |
| Mdem_scaffold_0040        | 847511        | 856069        | K425_1278        |                   |                                                         | neuroigin-4, Y-linked-like protein                                                |
| Mdem_scaffold_0040        | 858563        | 871165        | K425_1268        |                   |                                                         | neurogenic protein big brain-like protein                                         |
| Mdem_scaffold_0040        | 869457        | 874333        | K425_1277        |                   |                                                         | transmembrane protein 50A-like protein                                            |
| Mdem_scaffold_0040        | 875224        | 879840        | K425_1269        |                   |                                                         | calcineurin subunit B type 2-like protein                                         |
| Mdem_scaffold_0040        | 882343        | 886087        | K425_1270        |                   |                                                         | tissue inhibitor of metalloproteases domain-containing protein                    |
| Mdem_scaffold_0040        | 888510        | 896727        | K425_1276        |                   |                                                         | 5' nucleotidase, putative                                                         |
| Mdem_scaffold_0040        | 898591        | 899459        | K425_1271        |                   |                                                         | tissue inhibitor of metalloproteases domain-containing protein                    |
| Mdem_scaffold_0067        | 72            | 1477          | K425_1559        |                   |                                                         | histone H1-like protein                                                           |
| <b>Mdem_scaffold_0067</b> | <b>5376</b>   | <b>7229</b>   | <b>K425_1560</b> | <b>odv-e66-13</b> |                                                         | <b>putative envelope protein ODV-E66-13</b>                                       |
| Mdem_scaffold_0067        | 10257         | 12926         | K425_1561        |                   |                                                         | conserved uncharacterized protein                                                 |
| Mdem_scaffold_0067        | 14357         | 35646         | K425_1562        |                   |                                                         | piopio-like protein                                                               |
| Mdem_scaffold_0067        | 40186         | 46452         | K425_1592        |                   |                                                         | conserved uncharacterized protein                                                 |
| Mdem_scaffold_0067        | 59003         | 61474         | K425_1563        |                   |                                                         | conserved uncharacterized protein                                                 |
| Mdem_scaffold_0067        | 68883         | 85404         | K425_1564        |                   |                                                         | P-type ATPase of unknown pump specificity (type V)                                |
| Mdem_scaffold_0067        | 85891         | 86488         | K425_1591        |                   |                                                         | histone H2-like protein                                                           |
| Mdem_scaffold_0067        | 86284         | 87180         | K425_1565        |                   |                                                         | histone H2-like protein                                                           |
| Mdem_scaffold_0067        | 91506         | 92091         | K425_1566        |                   |                                                         | histone H3-like protein                                                           |
| Mdem_scaffold_0067        | 94424         | 94495         | K425_1558        |                   |                                                         | tRNA-Glu                                                                          |
| Mdem_scaffold_0067        | 96731         | 101006        | K425_1567        |                   |                                                         | Chondroitin N-acetylgalactosaminyltransferase domain-containing protein           |
| Mdem_scaffold_0067        | 100358        | 104502        | K425_1590        |                   |                                                         | ell-associated factor Eaf-like protein                                            |
| Mdem_scaffold_0067        | 107093        | 107254        | K425_1589        |                   |                                                         | hypothetical protein                                                              |
| Mdem_scaffold_0067        | 108986        | 115197        | K425_1588        |                   |                                                         | conserved uncharacterized protein                                                 |
| Mdem_scaffold_0067        | 118310        | 126705        | K425_1587        |                   |                                                         | neprilysin-like protein                                                           |
| Mdem_scaffold_0067        | 128187        | 137461        | K425_1586        |                   |                                                         | conserved uncharacterized protein                                                 |
| Mdem_scaffold_0067        | 151334        | 152787        | K425_1568        |                   |                                                         | conserved uncharacterized protein                                                 |
| Mdem_scaffold_0067        | 158733        | 160515        | K425_1585        |                   |                                                         | conserved uncharacterized protein                                                 |
| Mdem_scaffold_0067        | 166485        | 170430        | K425_1584        |                   |                                                         | conserved uncharacterized protein                                                 |
| Mdem_scaffold_0067        | 172220        | 182211        | K425_1569        |                   |                                                         | hypothetical protein                                                              |
| Mdem_scaffold_0067        | 183817        | 193188        | K425_1570        |                   |                                                         | convoluted-like protein                                                           |
| Mdem_scaffold_0067        | 203210        | 205940        | K425_1571        |                   |                                                         | hypothetical protein                                                              |
| Mdem_scaffold_0067        | 208382        | 209719        | K425_1572        |                   |                                                         | hypothetical protein                                                              |
| Mdem_scaffold_0067        | 219492        | 225554        | K425_1573        |                   |                                                         | quasimodo-like protein                                                            |
| Mdem_scaffold_0067        | 224728        | 228630        | K425_1583        |                   |                                                         | methylcrotonoyl-CoA carboxylase beta chain, mitochondrial-like protein            |
| Mdem_scaffold_0067        | 229463        | 234491        | K425_1574        |                   |                                                         | fanconi-associated nuclease 1-like protein                                        |
| Mdem_scaffold_0067        | 234618        | 240916        | K425_1575        |                   |                                                         | lysophospholipid acyltransferase 5-like protein                                   |
| Mdem_scaffold_0067        | 242526        | 243853        | K425_1581        |                   |                                                         | tweedle motif cuticular-like protein                                              |
| Mdem_scaffold_0067        | 250734        | 255499        | K425_1582        |                   |                                                         | tweedle motif cuticular-like protein                                              |
| Mdem_scaffold_0067        | 289057        | 291108        | K425_1577        |                   |                                                         | hypothetical protein                                                              |
| Mdem_scaffold_0067        | 325970        | 332014        | K425_1578        |                   |                                                         | hypothetical protein                                                              |
| Mdem_scaffold_0067        | 338353        | 355530        | K425_1580        |                   |                                                         | potassium voltage-gated channel subfamily-like protein                            |
| Mdem_scaffold_0067        | 362467        | 363717        | K425_1579        |                   |                                                         | conserved uncharacterized protein                                                 |
| Mdem_scaffold_0116        | 71602         | 73213         | K425_180         |                   | similar to GFV-B16-ORF1-like protein                    | conserved uncharacterized protein family 6                                        |
| Mdem_scaffold_0116        | 177044        | 178186        | K425_142         |                   | similar to GFV-B16-ORF1-like protein                    | conserved uncharacterized protein family 6                                        |
| Mdem_scaffold_0116        | 183517        | 196158        | K425_179         |                   |                                                         | Origin recognition complex (ORC) subunit 3 domain-containing protein              |
| <b>Mdem_scaffold_0116</b> | <b>193944</b> | <b>194807</b> | <b>K425_143</b>  | <b>pif-4</b>      | <b>present in Microplitis demolitor virus particles</b> | <b>per os infectivity factor pif-4 (19kDa)</b>                                    |
| Mdem_scaffold_0116        | 195537        | 228610        | K425_144         |                   |                                                         | Fasciclin domain-containing protein                                               |
| Mdem_scaffold_0116        | 215033        | 216174        | K425_178         |                   |                                                         | skpF-like protein                                                                 |
| Mdem_scaffold_0116        | 228908        | 233376        | K425_145         |                   |                                                         | skpB-like protein                                                                 |
| Mdem_scaffold_0116        | 234019        | 236247        | K425_146         |                   |                                                         | skpA-like protein                                                                 |
| Mdem_scaffold_0116        | 238044        | 240484        | K425_147         |                   |                                                         | Dolichol-phosphate mannosyltransferase subunit 3 (DPM3) domain-containing protein |
| Mdem_scaffold_0116        | 239053        | 241981        | K425_177         |                   |                                                         | diphthamide biosynthesis protein 2                                                |
| Mdem_scaffold_0116        | 247684        | 250086        | K425_176         |                   |                                                         | Ras-related protein Rab-8A-like protein                                           |
| Mdem_scaffold_0116        | 253075        | 256527        | K425_175         |                   |                                                         | conserved uncharacterized protein                                                 |
| <b>Mdem_scaffold_0116</b> | <b>259784</b> | <b>260881</b> | <b>K425_148</b>  | <b>odv-e66-4</b>  |                                                         | <b>putative envelope protein ODV-E66-4, partial</b>                               |
| Mdem_scaffold_0116        | 262190        | 264795        | K425_149         |                   |                                                         | fas apoptotic inhibitory molecule 2-like protein                                  |
| Mdem_scaffold_0116        | 267228        | 271795        | K425_150         |                   |                                                         | 3-hydroxyisobutyryl-CoA hydrolase, mitochondrial-like protein                     |
| Mdem_scaffold_0116        | 274946        | 279407        | K425_174         |                   |                                                         | GTP-binding protein SAR1b-like protein                                            |
| Mdem_scaffold_0116        | 284169        | 298554        | K425_151         |                   |                                                         | vacuolar protein sorting-associated protein 13C-like protein                      |
| Mdem_scaffold_0116        | 299684        | 301688        | K425_173         |                   |                                                         | carbonic anhydrase-like protein                                                   |
| Mdem_scaffold_0116        | 304097        | 318764        | K425_152         |                   |                                                         | metal transporter CNNM2-like protein                                              |
| Mdem_scaffold_0116        | 326533        | 332342        | K425_153         |                   |                                                         | neuropeptide FF receptor 2-like protein                                           |
| Mdem_scaffold_0116        | 333257        | 336188        | K425_172         |                   |                                                         | conserved uncharacterized protein                                                 |
| Mdem_scaffold_0116        | 334542        | 340199        | K425_154         |                   |                                                         | protein farnesyltransferase subunit beta-like protein                             |
| Mdem_scaffold_0116        | 341820        | 343398        | K425_155         |                   |                                                         | ATP synthase subunit H domain-containing protein                                  |
| Mdem_scaffold_0116        | 346684        | 350277        | K425_171         |                   |                                                         | Serendipity locus alpha protein (SRY-A) domain-containing protein                 |
| Mdem_scaffold_0116        | 354631        | 370850        | K425_156         |                   |                                                         | conserved uncharacterized protein                                                 |
| Mdem_scaffold_0116        | 358192        | 359199        | K425_170         |                   |                                                         | conserved uncharacterized protein                                                 |
| Mdem_scaffold_0116        | 387876        | 395755        | K425_169         |                   |                                                         | chaoptin-like protein                                                             |
| Mdem_scaffold_0116        | 418436        | 420157        | K425_158         |                   |                                                         | Maltase 1-like protein                                                            |
| Mdem_scaffold_0116        | 423897        | 425829        | K425_157         |                   |                                                         | Maltase 1-like protein                                                            |
| Mdem_scaffold_0116        | 426311        | 428275        | K425_160         |                   |                                                         | Maltase 1-like protein                                                            |
| Mdem_scaffold_0116        | 428813        | 430674        | K425_159         |                   |                                                         | Maltase 1-like protein                                                            |
| Mdem_scaffold_0116        | 431356        | 433062        | K425_161         |                   |                                                         | Maltase 1-like protein                                                            |
| Mdem_scaffold_0116        | 435118        | 437033        | K425_162         |                   |                                                         | Maltase 1-like protein                                                            |



|                    |        |        |          |                            |                                                                                              |                                                                            |
|--------------------|--------|--------|----------|----------------------------|----------------------------------------------------------------------------------------------|----------------------------------------------------------------------------|
| Mdem_scaffold_0116 | 438303 | 438389 | K425_141 |                            |                                                                                              | tRNA-Ser                                                                   |
| Mdem_scaffold_0116 | 440520 | 440585 | K425_168 |                            |                                                                                              | hypothetical protein                                                       |
| Mdem_scaffold_0116 | 460056 | 461749 | K425_163 |                            |                                                                                              | hypothetical protein                                                       |
| Mdem_scaffold_0116 | 594965 | 595039 | K425_140 |                            |                                                                                              | tRNA-Thr                                                                   |
| Mdem_scaffold_0116 | 693890 | 701966 | K425_164 |                            |                                                                                              | chaoptin-like protein                                                      |
| Mdem_scaffold_0116 | 720116 | 721074 | K425_167 |                            |                                                                                              | ion-transport peptide precursor-like protein                               |
| Mdem_scaffold_0116 | 739737 | 744872 | K425_165 |                            |                                                                                              | ras-related protein Rab-27A-like protein                                   |
| Mdem_scaffold_0116 | 751128 | 778997 | K425_166 |                            |                                                                                              | disintegrin and metalloproteinase domain-containing protein                |
| Mdem_scaffold_0130 | 11508  | 15182  | K425_191 |                            |                                                                                              | LIM domain-containing protein                                              |
| Mdem_scaffold_0130 | 29438  | 34272  | K425_207 |                            |                                                                                              | conserved uncharacterized protein                                          |
| Mdem_scaffold_0130 | 40078  | 43161  | K425_205 |                            |                                                                                              | conserved uncharacterized protein family 2                                 |
| Mdem_scaffold_0130 | 44333  | 52863  | K425_206 |                            |                                                                                              | conserved uncharacterized protein family 2                                 |
| Mdem_scaffold_0130 | 54349  | 55823  | K425_204 | pif-2                      | present in <i>Microplitis demolitor</i> virus particles                                      | per os infectivity factor pif-2                                            |
| Mdem_scaffold_0130 | 57973  | 58317  | K425_192 |                            | similar to pif-1                                                                             | hypothetical protein                                                       |
| Mdem_scaffold_0130 | 58164  | 59927  | K425_193 | pif-1                      | present in <i>Microplitis demolitor</i> virus particles                                      | per os infectivity factor pif-1                                            |
| Mdem_scaffold_0130 | 78416  | 97999  | K425_194 |                            |                                                                                              | 7 transmembrane receptor (rhodopsin family) domain-containing protein      |
| Mdem_scaffold_0130 | 99391  | 106116 | K425_203 |                            |                                                                                              | MFS sugar transporter, spinster-like protein                               |
| Mdem_scaffold_0130 | 123285 | 129513 | K425_195 |                            |                                                                                              | ion channel regulatory protein UNC-93 domain-containing protein            |
| Mdem_scaffold_0130 | 132378 | 139352 | K425_202 |                            |                                                                                              | Proline dehydrogenase domain-containing protein                            |
| Mdem_scaffold_0130 | 141882 | 147372 | K425_196 |                            |                                                                                              | elongator complex protein 4-like protein                                   |
| Mdem_scaffold_0130 | 152188 | 163763 | K425_197 |                            |                                                                                              | chaperone protein DnaK                                                     |
| Mdem_scaffold_0130 | 164217 | 170820 | K425_198 |                            |                                                                                              | ethanolamine kinase 1-like protein                                         |
| Mdem_scaffold_0130 | 172538 | 180164 | K425_199 |                            |                                                                                              | lobe-like protein                                                          |
| Mdem_scaffold_0130 | 180657 | 184751 | K425_208 |                            |                                                                                              | tetraspanin domain-containing protein                                      |
| Mdem_scaffold_0130 | 240037 | 249232 | K425_200 |                            |                                                                                              | bric-a-brac-like protein                                                   |
| Mdem_scaffold_0130 | 259598 | 267609 | K425_201 |                            |                                                                                              | nanos-like protein                                                         |
| Mdem_scaffold_0157 | 3446   | 3697   | K425_416 |                            |                                                                                              | hypothetical protein                                                       |
| Mdem_scaffold_0157 | 4312   | 4797   | K425_417 |                            |                                                                                              | hypothetical protein                                                       |
| Mdem_scaffold_0157 | 10395  | 11585  | K425_418 |                            |                                                                                              | 7tm Chemosensory receptor domain-containing protein                        |
| Mdem_scaffold_0157 | 15777  | 17842  | K425_419 |                            |                                                                                              | 7tm Chemosensory receptor domain-containing protein                        |
| Mdem_scaffold_0157 | 20931  | 25147  | K425_420 |                            |                                                                                              | 7tm Chemosensory receptor domain-containing protein                        |
| Mdem_scaffold_0157 | 38299  | 41566  | K425_434 |                            |                                                                                              | hypothetical protein                                                       |
| Mdem_scaffold_0157 | 60220  | 65270  | K425_421 |                            |                                                                                              | hypothetical protein                                                       |
| Mdem_scaffold_0157 | 67218  | 68082  | K425_433 |                            |                                                                                              | hypothetical protein                                                       |
| Mdem_scaffold_0157 | 69293  | 70329  | K425_422 |                            | similar to GIP_L2_0080                                                                       | conserved uncharacterized protein                                          |
| Mdem_scaffold_0157 | 73114  | 75307  | K425_423 |                            |                                                                                              | 7tm Chemosensory receptor domain-containing protein                        |
| Mdem_scaffold_0157 | 76503  | 77398  | K425_432 |                            |                                                                                              | histone H4 replacement-like protein                                        |
| Mdem_scaffold_0157 | 78313  | 79761  | K425_424 |                            |                                                                                              | Partial alpha/beta-hydrolase lipase region-containing protein              |
| Mdem_scaffold_0157 | 80170  | 84382  | K425_425 |                            |                                                                                              | Partial alpha/beta-hydrolase lipase region-like protein                    |
| Mdem_scaffold_0157 | 87157  | 92143  | K425_431 |                            | similar to venom protein 2 from <i>Microctonus hyperodae</i>                                 | conserved uncharacterized protein family 3                                 |
| Mdem_scaffold_0157 | 105552 | 106552 | K425_430 |                            | similar to hypothetical protein ABX44706 from <i>Penaeus monodon</i> nudivirus and HzNVorf93 | conserved uncharacterized protein                                          |
| Mdem_scaffold_0157 | 110394 | 121443 | K425_426 |                            |                                                                                              | Nuclear pore complex protein Nup205                                        |
| Mdem_scaffold_0157 | 123495 | 124412 | K425_429 |                            |                                                                                              | Phosphatidylinositol-specific phospholipase C, X domain-containing protein |
| Mdem_scaffold_0157 | 125221 | 126069 | K425_428 |                            |                                                                                              | Phosphatidylinositol N-acetylglucosaminyltransferase subunit C             |
| Mdem_scaffold_0157 | 129406 | 132398 | K425_427 |                            |                                                                                              | transcription initiation factor TFIID subunit 6-like protein               |
| Mdem_scaffold_0159 | 6237   | 10641  | K425_474 |                            |                                                                                              | DNA topoisomerase 2-binding protein 1-like protein                         |
| Mdem_scaffold_0159 | 11833  | 15626  | K425_473 | gidA                       |                                                                                              | tRNA uridine 5-carboxymethylaminomethyl modification enzyme GidA           |
| Mdem_scaffold_0159 | 186762 | 188336 | K425_435 |                            |                                                                                              | hypothetical protein                                                       |
| Mdem_scaffold_0159 | 239920 | 242902 | K425_437 |                            |                                                                                              | protein-tyrosine sulfotransferase-like protein                             |
| Mdem_scaffold_0159 | 247905 | 256086 | K425_436 |                            |                                                                                              | DnaJ domain-containing protein                                             |
| Mdem_scaffold_0159 | 283560 | 291456 | K425_472 | purN                       |                                                                                              | phosphoribosylglycinamide formyltransferase                                |
| Mdem_scaffold_0159 | 294254 | 299302 | K425_471 |                            |                                                                                              | protein tyrosine kinase domain-containing protein                          |
| Mdem_scaffold_0159 | 301800 | 302681 | K425_438 |                            |                                                                                              | hypothetical protein                                                       |
| Mdem_scaffold_0159 | 306036 | 308385 | K425_439 |                            |                                                                                              | conserved hypothetical protein                                             |
| Mdem_scaffold_0159 | 309992 | 311462 | K425_440 | HZNvorf118-like (PmV-like) | similar to HZNvorf118 and PmV hypothetical protein                                           | Bracovirus particle protein HZNvorf118-like (PmV-like)                     |
| Mdem_scaffold_0159 | 315174 | 316855 | K425_470 | pif-3                      |                                                                                              | per os infectivity factor 3                                                |
| Mdem_scaffold_0159 | 316956 | 318148 | K425_441 | vp39                       | similar to HZNvorf89                                                                         | Major bracovirus capsid protein vp39                                       |
| Mdem_scaffold_0159 | 319248 | 319955 | K425_469 | 27b-like-1                 | similar to <i>Cotesia congregata</i> 27b product of Cc50C22.7                                | Bracovirus particle protein 27b-like-1                                     |
| Mdem_scaffold_0159 | 320040 | 321226 | K425_468 | Cc50C22.6-like-1           | similar to <i>Cotesia congregata</i> Cc50C22.6                                               | conserved hypothetical protein family 4                                    |
| Mdem_scaffold_0159 | 325975 | 328544 | K425_442 | Cc50C22.5-like             | similar to <i>Cotesia congregata</i> Cc50C22.5                                               | Bracovirus particle protein                                                |
| Mdem_scaffold_0159 | 329696 | 331138 | K425_443 | HZNvorf9-like 1            |                                                                                              | Bracovirus particle protein HZNvorf9-like 1                                |
| Mdem_scaffold_0159 | 331947 | 332375 | K425_444 | Cc50C22.3-like             | similar to <i>Cotesia congregata</i> Cc50C22.3                                               | conserved hypothetical protein                                             |
| Mdem_scaffold_0159 | 332331 | 333003 | K425_446 | HZNvorf94-like-1           |                                                                                              | hypothetical protein                                                       |
| Mdem_scaffold_0159 | 334139 | 335041 | K425_463 | 38K-1                      | similar to HZNvorf108                                                                        | Bracovirus particle protein 38K-2                                          |
| Mdem_scaffold_0159 | 336616 | 337482 | K425_462 | 35a-2                      | similar to 35a protein from <i>Chelonus inanitus</i>                                         | conserved uncharacterized protein 35a-like protein-3                       |
| Mdem_scaffold_0159 | 339560 | 340144 | K425_461 |                            |                                                                                              | hypothetical protein                                                       |
| Mdem_scaffold_0159 | 342879 | 348823 | K425_449 |                            |                                                                                              | exportin domain-containing protein                                         |
| Mdem_scaffold_0159 | 347604 | 354810 | K425_447 |                            |                                                                                              | aldehyde dehydrogenase domain-containing protein                           |
| Mdem_scaffold_0159 | 353604 | 354617 | K425_460 |                            |                                                                                              | methyltransferase domain-containing protein                                |
| Mdem_scaffold_0159 | 354449 | 361379 | K425_448 |                            |                                                                                              | lissencephaly-1-like protein                                               |

|                    |         |         |          |                  |                                               |                                                                                       |
|--------------------|---------|---------|----------|------------------|-----------------------------------------------|---------------------------------------------------------------------------------------|
| Mdem_scaffold_0159 | 368561  | 369415  | K425_458 | HZNvorf106-like  |                                               | Bracovirus particle protein HZNvorf106-like                                           |
| Mdem_scaffold_0159 | 370429  | 371388  | K425_457 | HZNvorf9-like-2  |                                               | Bracovirus particle protein HZNvorf9-like 2                                           |
| Mdem_scaffold_0159 | 371440  | 373231  | K425_459 |                  |                                               | hypothetical protein                                                                  |
| Mdem_scaffold_0159 | 372569  | 373186  | K425_450 |                  |                                               | hypothetical protein                                                                  |
| Mdem_scaffold_0159 | 374179  | 375393  | K425_456 |                  |                                               | hypothetical protein                                                                  |
| Mdem_scaffold_0159 | 378378  | 379147  | K425_451 | Cc50C22.6-like-2 | similar to Cotesia congregata Cc50C22.6       | conserved hypothetical protein family 4                                               |
| Mdem_scaffold_0159 | 379769  | 380755  | K425_452 | int-1            | similar to HZNvorf144                         | viral integrase, bracovirus particle protein                                          |
| Mdem_scaffold_0159 | 381633  | 382400  | K425_453 | 35a-4            | similar to 35a protein from Chelonus inanitus | conserved uncharacterized protein 35a-like protein-4                                  |
| Mdem_scaffold_0159 | 391816  | 393460  | K425_455 |                  |                                               | kelch domain-containing protein                                                       |
| Mdem_scaffold_0159 | 397495  | 399201  | K425_454 |                  |                                               | a-kinase anchor protein 10, mitochondrial-like protein                                |
| Mdem_scaffold_0240 | 120184  | 123924  | K425_600 |                  |                                               | lipase domain-containing protein                                                      |
| Mdem_scaffold_0240 | 129142  | 130005  | K425_561 |                  |                                               | Phosphatidylinositol-specific phospholipase C, X domain-like protein                  |
| Mdem_scaffold_0240 | 146864  | 147733  | K425_563 |                  |                                               | Phosphatidylinositol-specific phospholipase C, X domain-like protein                  |
| Mdem_scaffold_0240 | 150440  | 151411  | K425_562 |                  |                                               | Phosphatidylinositol-specific phospholipase C, X domain-like protein                  |
| Mdem_scaffold_0240 | 214596  | 227908  | K425_599 |                  |                                               | spalt major-like protein                                                              |
| Mdem_scaffold_0240 | 457732  | 459619  | K425_598 |                  |                                               | hypothetical protein                                                                  |
| Mdem_scaffold_0240 | 471740  | 475632  | K425_597 |                  |                                               | hypothetical protein                                                                  |
| Mdem_scaffold_0240 | 475658  | 478611  | K425_596 |                  |                                               | hypothetical protein                                                                  |
| Mdem_scaffold_0240 | 482533  | 484998  | K425_595 |                  |                                               | hypothetical protein                                                                  |
| Mdem_scaffold_0240 | 555943  | 560152  | K425_564 |                  |                                               | nose resistant to fluoxetine protein 6-like protein                                   |
| Mdem_scaffold_0240 | 621931  | 628123  | K425_565 |                  |                                               | hypothetical protein                                                                  |
| Mdem_scaffold_0240 | 658585  | 661612  | K425_594 | 35a-5            |                                               | conserved uncharacterized protein 35a-like protein-5                                  |
| Mdem_scaffold_0240 | 667806  | 668789  | K425_593 |                  |                                               | conserved uncharacterized protein                                                     |
| Mdem_scaffold_0240 | 672496  | 685219  | K425_592 |                  |                                               | CDK5 and ABL1 enzyme substrate 1-like protein                                         |
| Mdem_scaffold_0240 | 688321  | 695807  | K425_566 |                  |                                               | Gamma interferon inducible lysosomal thiol reductase (GILT) domain-containing protein |
| Mdem_scaffold_0240 | 695700  | 699295  | K425_591 |                  |                                               | splicing factor 45-like protein                                                       |
| Mdem_scaffold_0240 | 719367  | 725966  | K425_567 |                  |                                               | naked cuticle-like protein                                                            |
| Mdem_scaffold_0240 | 738449  | 744378  | K425_590 |                  |                                               | conserved uncharacterized protein                                                     |
| Mdem_scaffold_0240 | 748623  | 749504  | K425_568 |                  |                                               | Mediator of RNA polymerase II transcription subunit 29-like protein                   |
| Mdem_scaffold_0240 | 753136  | 764659  | K425_569 |                  |                                               | SRF-type transcription factor (DNA-binding and dimerization domain)                   |
| Mdem_scaffold_0240 | 778146  | 787946  | K425_570 |                  |                                               | abnormal spindle-like protein                                                         |
| Mdem_scaffold_0240 | 788705  | 801850  | K425_589 |                  |                                               | protein Mo25-like protein                                                             |
| Mdem_scaffold_0240 | 807652  | 814359  | K425_571 |                  |                                               | conserved uncharacterized protein                                                     |
| Mdem_scaffold_0240 | 813986  | 818915  | K425_588 |                  |                                               | pleiotropic regulator 1-like protein                                                  |
| Mdem_scaffold_0240 | 825275  | 829323  | K425_587 |                  |                                               | protein msta, isoform A-like protein                                                  |
| Mdem_scaffold_0240 | 837900  | 841330  | K425_586 |                  |                                               | SDA1 domain-containing protein                                                        |
| Mdem_scaffold_0240 | 842022  | 843655  | K425_585 |                  |                                               | origin recognition complex subunit 5-like protein                                     |
| Mdem_scaffold_0240 | 844986  | 849878  | K425_572 |                  |                                               | conserved uncharacterized protein                                                     |
| Mdem_scaffold_0240 | 847018  | 855347  | K425_584 |                  |                                               | amidophosphoribosyltransferase                                                        |
| Mdem_scaffold_0240 | 857000  | 861524  | K425_573 |                  |                                               | SAICAR synthetase domain-containing protein                                           |
| Mdem_scaffold_0240 | 865191  | 869188  | K425_583 |                  |                                               | Metallopeptidase family M24 protein                                                   |
| Mdem_scaffold_0240 | 871082  | 873801  | K425_574 |                  |                                               | conserved uncharacterized protein                                                     |
| Mdem_scaffold_0240 | 876017  | 882688  | K425_582 |                  |                                               | coiled-coil domain-containing protein 151-like protein                                |
| Mdem_scaffold_0240 | 934477  | 937307  | K425_581 |                  |                                               | hypothetical protein                                                                  |
| Mdem_scaffold_0240 | 958673  | 963684  | K425_575 |                  |                                               | notch-like protein                                                                    |
| Mdem_scaffold_0240 | 965147  | 966468  | K425_580 |                  |                                               | hypothetical protein                                                                  |
| Mdem_scaffold_0240 | 994555  | 1017195 | K425_576 |                  |                                               | notch-like protein                                                                    |
| Mdem_scaffold_0240 | 1050883 | 1068090 | K425_577 |                  |                                               | notch-like protein                                                                    |
| Mdem_scaffold_0240 | 1076655 | 1087878 | K425_579 |                  |                                               | polycomb-like protein                                                                 |
| Mdem_scaffold_0240 | 1091029 | 1092219 | K425_578 |                  |                                               | leucine-rich repeat-containing protein                                                |
| Mdem_scaffold_0275 | 750     | 20646   | K425_915 |                  |                                               | ligand-gated ion channel pHCl-like protein                                            |
| Mdem_scaffold_0275 | 37937   | 39867   | K425_751 |                  |                                               | trypsin-like protein                                                                  |
| Mdem_scaffold_0275 | 41878   | 45439   | K425_752 |                  |                                               | trypsin-like protein                                                                  |
| Mdem_scaffold_0275 | 52770   | 54948   | K425_753 |                  |                                               | trypsin-like protein                                                                  |
| Mdem_scaffold_0275 | 54822   | 59503   | K425_914 |                  |                                               | Flavin-containing monooxygenase-like protein                                          |
| Mdem_scaffold_0275 | 61852   | 72695   | K425_913 |                  |                                               | Sterile20-like protein                                                                |
| Mdem_scaffold_0275 | 76898   | 84546   | K425_912 |                  |                                               | fatty acid amide hydrolase 2-like protein                                             |
| Mdem_scaffold_0275 | 85141   | 86711   | K425_754 |                  |                                               | mimitin, mitochondrial-like protein                                                   |
| Mdem_scaffold_0275 | 86698   | 97434   | K425_911 |                  |                                               | poly(U)-binding-splicing factor half pint-like protein                                |
| Mdem_scaffold_0275 | 98436   | 100673  | K425_755 |                  |                                               | SET domain-containing protein                                                         |
| Mdem_scaffold_0275 | 213994  | 228851  | K425_756 |                  |                                               | Immunoglobulin domain-containing protein                                              |
| Mdem_scaffold_0275 | 228828  | 230147  | K425_910 | pif-5-1          | synonym odv-e56                               | putative envelope protein ODV-E56-1                                                   |
| Mdem_scaffold_0275 | 237692  | 238423  | K425_909 |                  |                                               | atonal-like protein                                                                   |
| Mdem_scaffold_0275 | 245055  | 246443  | K425_908 |                  |                                               | DNL-type zinc finger-like protein                                                     |
| Mdem_scaffold_0275 | 247077  | 249126  | K425_757 |                  |                                               | HAD hydrolase, family IIID                                                            |
| Mdem_scaffold_0275 | 249966  | 250037  | K425_750 |                  |                                               | tRNA-Asp                                                                              |
| Mdem_scaffold_0275 | 250759  | 256399  | K425_758 |                  |                                               | putative mitochondrial inner membrane-like protein                                    |
| Mdem_scaffold_0275 | 256376  | 259330  | K425_907 |                  |                                               | Fumarylacetoacetate hydrolase domain-containing protein                               |
| Mdem_scaffold_0275 | 260171  | 266542  | K425_759 |                  |                                               | E3 ubiquitin-protein ligase UHRF1-like protein                                        |
| Mdem_scaffold_0275 | 263951  | 266624  | K425_906 |                  |                                               | NADH:ubiquinone reductase 23kD subunit precursor                                      |
| Mdem_scaffold_0275 | 267232  | 270177  | K425_905 |                  |                                               | conserved uncharacterized protein                                                     |
| Mdem_scaffold_0275 | 273302  | 285130  | K425_760 |                  |                                               | conserved uncharacterized protein                                                     |
| Mdem_scaffold_0275 | 289178  | 291452  | K425_904 |                  |                                               | aurora-like protein                                                                   |
| Mdem_scaffold_0275 | 291600  | 300643  | K425_761 |                  |                                               | DEAD/DEAH box helicase domain-containing protein                                      |
| Mdem_scaffold_0275 | 298205  | 302932  | K425_903 |                  |                                               | putative methyltransferase                                                            |
| Mdem_scaffold_0275 | 300818  | 307295  | K425_762 |                  |                                               | Transmembrane-like protein                                                            |
| Mdem_scaffold_0275 | 307513  | 311022  | K425_902 |                  |                                               | Beta-1,4-galactosyltransferase-like protein                                           |
| Mdem_scaffold_0275 | 311472  | 318777  | K425_763 |                  |                                               | dyactin subunit 1-like protein                                                        |
| Mdem_scaffold_0275 | 321765  | 325124  | K425_901 |                  |                                               | Casein kinase I isoform alpha-like protein                                            |
| Mdem_scaffold_0275 | 325919  | 332036  | K425_764 |                  |                                               | egalitarian-like protein                                                              |

|                    |        |        |          |                      |                      |                                                                           |
|--------------------|--------|--------|----------|----------------------|----------------------|---------------------------------------------------------------------------|
| Mdem_scaffold_0275 | 332726 | 335485 | K425_765 |                      |                      | conserved uncharacterized protein                                         |
| Mdem_scaffold_0275 | 335530 | 346673 | K425_900 |                      |                      | huntingtin-like protein                                                   |
| Mdem_scaffold_0275 | 345726 | 349212 | K425_766 |                      |                      | thioredoxin peroxidase-like protein                                       |
| Mdem_scaffold_0275 | 349765 | 352531 | K425_767 |                      |                      | conserved uncharacterized protein                                         |
| Mdem_scaffold_0275 | 352627 | 360267 | K425_899 |                      |                      | Phosphatidylinositol phosphatase SAC2-like protein                        |
| Mdem_scaffold_0275 | 360680 | 364218 | K425_768 |                      |                      | docking-like protein                                                      |
| Mdem_scaffold_0275 | 370440 | 378938 | K425_769 |                      |                      | hypothetical protein                                                      |
| Mdem_scaffold_0275 | 389321 | 393621 | K425_770 |                      |                      | anaphase-promoting complex subunit 7-like protein                         |
| Mdem_scaffold_0275 | 396541 | 398270 | K425_771 |                      |                      | rabphilin-like protein                                                    |
| Mdem_scaffold_0275 | 398729 | 404394 | K425_898 |                      |                      | conserved uncharacterized protein                                         |
| Mdem_scaffold_0275 | 404589 | 406040 | K425_772 |                      |                      | conserved uncharacterized protein                                         |
| Mdem_scaffold_0275 | 406547 | 409490 | K425_897 |                      |                      | conserved uncharacterized protein                                         |
| Mdem_scaffold_0275 | 409716 | 412154 | K425_773 |                      |                      | Thioredoxin domain-containing protein                                     |
| Mdem_scaffold_0275 | 412618 | 414177 | K425_774 |                      |                      | vacuolar protein sorting-associated protein 37B-like protein              |
| Mdem_scaffold_0275 | 414396 | 415413 | K425_896 |                      |                      | DnaI domain-containing protein                                            |
| Mdem_scaffold_0275 | 415898 | 418381 | K425_776 |                      |                      | Copper chaperone for superoxide dismutase-like protein                    |
| Mdem_scaffold_0275 | 419021 | 421682 | K425_775 |                      |                      | nitrilase 1-like protein                                                  |
| Mdem_scaffold_0275 | 421570 | 422459 | K425_895 |                      |                      | small ribonucleoprotein particle protein SmD3                             |
| Mdem_scaffold_0275 | 422144 | 424479 | K425_777 |                      |                      | conserved uncharacterized protein                                         |
| Mdem_scaffold_0275 | 424344 | 425754 | K425_894 |                      |                      | Histone RNA hairpin-binding protein RNA-binding domain-containing protein |
| Mdem_scaffold_0275 | 426514 | 430608 | K425_778 |                      |                      | AN1-type zinc finger protein 1-like protein                               |
| Mdem_scaffold_0275 | 430618 | 437842 | K425_893 |                      |                      | Endonuclease/Exonuclease/phosphatase family protein                       |
| Mdem_scaffold_0275 | 439321 | 443857 | K425_779 |                      |                      | epsilon-sarcoglycan-like protein                                          |
| Mdem_scaffold_0275 | 445292 | 446714 | K425_891 |                      |                      | mitochondrial ribosomal protein L35-like protein                          |
| Mdem_scaffold_0275 | 447222 | 449572 | K425_892 |                      |                      | mitochondrial ribosomal protein L45-like protein                          |
| Mdem_scaffold_0275 | 449742 | 455338 | K425_780 |                      |                      | phosphatidylinositol synthase-like protein                                |
| Mdem_scaffold_0275 | 451594 | 455363 | K425_890 |                      |                      | tRNA pseudouridine synthase                                               |
| Mdem_scaffold_0275 | 455585 | 458557 | K425_781 |                      |                      | charged multivesicular body protein 7-like protein                        |
| Mdem_scaffold_0275 | 458537 | 462835 | K425_889 |                      |                      | Coagulation factor IX-like protein                                        |
| Mdem_scaffold_0275 | 462963 | 467156 | K425_782 |                      |                      | Zinc finger, C2H2 type domain-containing protein                          |
| Mdem_scaffold_0275 | 468035 | 470012 | K425_888 |                      |                      | putative small nuclear ribonucleoprotein G                                |
| Mdem_scaffold_0275 | 470842 | 472779 | K425_887 |                      |                      | Anaphase-promoting complex subunit 10                                     |
| Mdem_scaffold_0275 | 473852 | 478663 | K425_886 |                      |                      | carnation-like protein                                                    |
| Mdem_scaffold_0275 | 478881 | 480263 | K425_783 |                      |                      | phosphoglycerate mutase 1 family                                          |
| Mdem_scaffold_0275 | 482236 | 488504 | K425_885 |                      |                      | putative methyltransferase                                                |
| Mdem_scaffold_0275 | 491485 | 496868 | K425_884 |                      |                      | alpha-N-acetylgalactosaminidase-like protein                              |
| Mdem_scaffold_0275 | 498391 | 500316 | K425_784 |                      |                      | vps2-like protein                                                         |
| Mdem_scaffold_0275 | 500593 | 505288 | K425_785 |                      |                      | topoisomerase 3beta-like protein                                          |
| Mdem_scaffold_0275 | 506117 | 516212 | K425_786 |                      |                      | ricketts-like protein                                                     |
| Mdem_scaffold_0275 | 520788 | 529347 | K425_883 |                      |                      | protein tyrosine phosphatase-like protein                                 |
| Mdem_scaffold_0275 | 530097 | 530717 | K425_787 | lef-5                |                      | putative transcription initiation factor lef-5                            |
| Mdem_scaffold_0275 | 530749 | 532041 | K425_788 | vlf-1                | synonym vlf-1a       | very late factor 1, bracovirus capsid protein                             |
| Mdem_scaffold_0275 | 537963 | 566096 | K425_882 |                      |                      | protein tracheless-like protein                                           |
| Mdem_scaffold_0275 | 616425 | 617597 | K425_789 | HZNvorf64-like (p51) | similar to HZNvorf64 | Bracovirus particle protein HZNvorf64-like (p51)                          |
| Mdem_scaffold_0275 | 623039 | 661917 | K425_881 |                      |                      | Nuclear envelope localisation domain-containing protein                   |
| Mdem_scaffold_0275 | 664354 | 667631 | K425_880 |                      |                      | Trophoblast glycoprotein-like protein                                     |
| Mdem_scaffold_0275 | 669017 | 676025 | K425_790 |                      |                      | conserved uncharacterized protein                                         |
| Mdem_scaffold_0275 | 677975 | 682010 | K425_791 |                      |                      | cytochrome P450 domain-containing protein                                 |
| Mdem_scaffold_0275 | 682558 | 685431 | K425_879 |                      |                      | 3-demethylubiquinone-9 3-O-methyltransferase                              |
| Mdem_scaffold_0275 | 687955 | 691108 | K425_792 |                      |                      | RILP-like protein                                                         |
| Mdem_scaffold_0275 | 693336 | 697724 | K425_878 |                      |                      | partner of drosha-like protein                                            |
| Mdem_scaffold_0275 | 700118 | 706148 | K425_877 |                      |                      | tetraspanin-like protein                                                  |
| Mdem_scaffold_0275 | 707239 | 716124 | K425_876 |                      |                      | stromal interaction molecule-like protein                                 |
| Mdem_scaffold_0275 | 717417 | 721669 | K425_793 |                      |                      | cramped-like protein                                                      |
| Mdem_scaffold_0275 | 723397 | 726241 | K425_794 |                      |                      | ETS-like proteinous factor                                                |
| Mdem_scaffold_0275 | 724598 | 729744 | K425_875 |                      |                      | arginine methyltransferase 3-like protein                                 |
| Mdem_scaffold_0275 | 729309 | 736996 | K425_795 |                      |                      | DNA repair and recombination protein RadaA-like protein                   |
| Mdem_scaffold_0275 | 731434 | 735004 | K425_796 |                      |                      | asteroid-like protein                                                     |
| Mdem_scaffold_0275 | 736776 | 740835 | K425_874 |                      |                      | Annexin-B9                                                                |
| Mdem_scaffold_0275 | 741807 | 750537 | K425_797 |                      |                      | Palmitoyltransferase ZDHHC2                                               |
| Mdem_scaffold_0275 | 751997 | 753955 | K425_873 |                      |                      | Putative hydroxyypyruvate isomerase                                       |
| Mdem_scaffold_0275 | 754117 | 756534 | K425_872 |                      |                      | abhydrolase domain-containing protein                                     |
| Mdem_scaffold_0275 | 758313 | 766301 | K425_871 |                      |                      | monocarboxylate transporter 13-like protein                               |
| Mdem_scaffold_0275 | 766194 | 769045 | K425_870 |                      |                      | leucine-rich repeat-containing protein                                    |
| Mdem_scaffold_0275 | 769387 | 773328 | K425_798 |                      |                      | transmembrane protein 39-like protein                                     |
| Mdem_scaffold_0275 | 772125 | 775494 | K425_869 |                      |                      | NUDIX domain-containing protein                                           |
| Mdem_scaffold_0275 | 776292 | 779563 | K425_799 |                      |                      | cytochrome c oxidase assembly protein COX15-like protein                  |
| Mdem_scaffold_0275 | 780775 | 784510 | K425_868 |                      |                      | ubiquitin domain-containing protein                                       |
| Mdem_scaffold_0275 | 785351 | 791705 | K425_801 |                      |                      | MMS19 nucleotide excision repair-like protein                             |
| Mdem_scaffold_0275 | 791210 | 792631 | K425_800 |                      |                      | MORN repeat-containing protein                                            |
| Mdem_scaffold_0275 | 795526 | 798572 | K425_802 |                      |                      | neuronal acetylcholine receptor subunit alpha-like protein                |
| Mdem_scaffold_0275 | 798536 | 800627 | K425_867 |                      |                      | calmodulin-like protein 4-like protein                                    |
| Mdem_scaffold_0275 | 802363 | 806989 | K425_803 |                      |                      | solute carrier family 25-like protein                                     |
| Mdem_scaffold_0275 | 806550 | 808708 | K425_866 |                      |                      | mitotic checkpoint protein BUB3-like protein                              |
| Mdem_scaffold_0275 | 809108 | 813455 | K425_804 |                      |                      | ribosomal protein L4                                                      |
| Mdem_scaffold_0275 | 814596 | 816164 | K425_805 |                      |                      | pre-mRNA-splicing factor SPF27-like protein                               |
| Mdem_scaffold_0275 | 817235 | 831308 | K425_865 |                      |                      | colorectal mutant cancer-like protein                                     |
| Mdem_scaffold_0275 | 833130 | 840544 | K425_864 |                      |                      | ETS domain-containing protein                                             |
| Mdem_scaffold_0275 | 852701 | 856402 | K425_806 |                      |                      | solute carrier family 25-like protein                                     |
| Mdem_scaffold_0275 | 856881 | 859279 | K425_863 |                      |                      | hypothetical protein                                                      |
| Mdem_scaffold_0275 | 860238 | 862937 | K425_862 | lef-9                |                      | viral RNA polymerase subunit lef-9                                        |

|                    |         |         |          |             |                                                                                                                                                 |                                                                            |
|--------------------|---------|---------|----------|-------------|-------------------------------------------------------------------------------------------------------------------------------------------------|----------------------------------------------------------------------------|
| Mdem_scaffold_0275 | 863392  | 869217  | K425_807 |             |                                                                                                                                                 | annexin-like protein                                                       |
| Mdem_scaffold_0275 | 874066  | 876108  | K425_808 |             |                                                                                                                                                 | conserved uncharacterized protein                                          |
| Mdem_scaffold_0275 | 878430  | 879719  | K425_861 |             |                                                                                                                                                 | dopamine receptor 2-like protein                                           |
| Mdem_scaffold_0275 | 907036  | 909835  | K425_860 |             |                                                                                                                                                 | 7tm chemosensory receptor                                                  |
| Mdem_scaffold_0275 | 910801  | 915478  | K425_809 |             | similar to venom protein 2 from <i>Microctonus hyperodae</i>                                                                                    | conserved uncharacterized protein family 3                                 |
| Mdem_scaffold_0275 | 915381  | 916697  | K425_859 |             |                                                                                                                                                 | BTB/POZ domain-containing protein                                          |
| Mdem_scaffold_0275 | 928746  | 930547  | K425_858 |             |                                                                                                                                                 | sprouty-like protein                                                       |
| Mdem_scaffold_0275 | 959630  | 1004377 | K425_857 |             |                                                                                                                                                 | eukaryotic translation initiation factor 5B-like protein                   |
| Mdem_scaffold_0275 | 1003399 | 1006214 | K425_810 |             |                                                                                                                                                 | ribosomal protein L27A, isoform A                                          |
| Mdem_scaffold_0275 | 1006809 | 1007765 | K425_856 |             |                                                                                                                                                 | splicing factor 3A subunit 2-like protein                                  |
| Mdem_scaffold_0275 | 1010700 | 1011662 | K425_855 |             |                                                                                                                                                 | Phosphatidylinositol-specific phospholipase C, X domain-containing protein |
| Mdem_scaffold_0275 | 1013130 | 1015692 | K425_811 |             | similar to venom protein Ci-48a from <i>Chelonus inanitus</i>                                                                                   | conserved uncharacterized protein family 3                                 |
| Mdem_scaffold_0275 | 1015740 | 1017155 | K425_812 |             |                                                                                                                                                 | hypothetical protein                                                       |
| Mdem_scaffold_0275 | 1019566 | 1020470 | K425_813 |             |                                                                                                                                                 | conserved uncharacterized protein                                          |
| Mdem_scaffold_0275 | 1025373 | 1027023 | K425_814 |             |                                                                                                                                                 | conserved uncharacterized protein                                          |
| Mdem_scaffold_0275 | 1027526 | 1034208 | K425_854 |             |                                                                                                                                                 | conserved uncharacterized protein                                          |
| Mdem_scaffold_0275 | 1035821 | 1039008 | K425_815 |             |                                                                                                                                                 | conserved uncharacterized protein                                          |
| Mdem_scaffold_0275 | 1041181 | 1048509 | K425_853 |             |                                                                                                                                                 | monocarboxylate transporter 12-like protein                                |
| Mdem_scaffold_0275 | 1061081 | 1064062 | K425_816 |             |                                                                                                                                                 | alpha-tubulin-like protein                                                 |
| Mdem_scaffold_0275 | 1065553 | 1066904 | K425_817 |             |                                                                                                                                                 | conserved uncharacterized protein                                          |
| Mdem_scaffold_0275 | 1067930 | 1074048 | K425_818 |             |                                                                                                                                                 | MFS transporter domain-containing protein                                  |
| Mdem_scaffold_0275 | 1076207 | 1080250 | K425_852 |             |                                                                                                                                                 | adipocyte plasma membrane-associated-like protein                          |
| Mdem_scaffold_0275 | 1090524 | 1098177 | K425_851 |             |                                                                                                                                                 | Double-stranded RNA-specific editase Adar-like protein                     |
| Mdem_scaffold_0275 | 1104369 | 1105878 | K425_819 |             |                                                                                                                                                 | hypothetical protein                                                       |
| Mdem_scaffold_0275 | 1106640 | 1107784 | K425_850 |             |                                                                                                                                                 | AN1-type zinc finger domain-containing protein                             |
| Mdem_scaffold_0275 | 1108479 | 1110516 | K425_820 |             | similar to GIP_L7_0080, GFP_L5_0240, GIP_L2_0090, GFP_L5_0230, GFP_L5_0070, GFP_L5_0090, GIP_L2_0100, GIP_L7_0040, GIP_L7_0010, and GFP_L5_0190 | conserved uncharacterized protein family 7                                 |
| Mdem_scaffold_0275 | 1111738 | 1115079 | K425_821 |             |                                                                                                                                                 | disintegrin and metalloprotease-like protein                               |
| Mdem_scaffold_0275 | 1115574 | 1116578 | K425_849 |             |                                                                                                                                                 | hypothetical protein                                                       |
| Mdem_scaffold_0275 | 1129347 | 1131659 | K425_848 |             |                                                                                                                                                 | ribosome biogenesis protein BRX1-like protein                              |
| Mdem_scaffold_0275 | 1134352 | 1135701 | K425_822 |             |                                                                                                                                                 | hypothetical protein                                                       |
| Mdem_scaffold_0275 | 1135700 | 1138191 | K425_847 |             |                                                                                                                                                 | vascular endothelial growth factor receptor-like protein                   |
| Mdem_scaffold_0275 | 1140833 | 1142370 | K425_823 |             |                                                                                                                                                 | hypothetical protein                                                       |
| Mdem_scaffold_0275 | 1142343 | 1146415 | K425_846 |             |                                                                                                                                                 | anaphase-promoting complex subunit 4-like protein                          |
| Mdem_scaffold_0275 | 1150476 | 1155608 | K425_824 |             |                                                                                                                                                 | putative reverse transcriptase                                             |
| Mdem_scaffold_0275 | 1161034 | 1163400 | K425_825 |             |                                                                                                                                                 | hypothetical protein                                                       |
| Mdem_scaffold_0275 | 1169048 | 1173820 | K425_826 | helicase    |                                                                                                                                                 | putative viral DNA helicase and primase                                    |
| Mdem_scaffold_0275 | 1175110 | 1177308 | K425_827 |             |                                                                                                                                                 | BTB/POZ domain-containing protein                                          |
| Mdem_scaffold_0275 | 1178085 | 1179871 | K425_828 |             |                                                                                                                                                 | BTB/POZ domain-containing protein                                          |
| Mdem_scaffold_0275 | 1183124 | 1191645 | K425_845 |             |                                                                                                                                                 | conserved uncharacterized protein                                          |
| Mdem_scaffold_0275 | 1193865 | 1194953 | K425_844 |             | similar to <i>Cotesia congregata</i> Cc8L18.1 from p74 genomic region                                                                           | conserved uncharacterized protein family 8                                 |
| Mdem_scaffold_0275 | 1196093 | 1198158 | K425_843 |             |                                                                                                                                                 | TAZ zinc finger domain-containing protein                                  |
| Mdem_scaffold_0275 | 1199239 | 1201799 | K425_842 |             |                                                                                                                                                 | TAZ zinc finger domain-containing protein                                  |
| Mdem_scaffold_0275 | 1202631 | 1204641 | K425_829 |             |                                                                                                                                                 | hypothetical protein                                                       |
| Mdem_scaffold_0275 | 1205148 | 1209163 | K425_830 |             |                                                                                                                                                 | iduronate 2-sulfatase-like protein                                         |
| Mdem_scaffold_0275 | 1209166 | 1221464 | K425_841 |             |                                                                                                                                                 | Transcriptional regulator ATRX-like protein                                |
| Mdem_scaffold_0275 | 1224380 | 1226963 | K425_840 |             |                                                                                                                                                 | Zinc finger, C2H2 type domain-containing protein                           |
| Mdem_scaffold_0275 | 1227396 | 1230457 | K425_839 |             |                                                                                                                                                 | Zinc finger, C2H2 type domain-containing protein                           |
| Mdem_scaffold_0275 | 1228598 | 1232742 | K425_831 |             |                                                                                                                                                 | non-structural maintenance of chromosomes element 1-like protein           |
| Mdem_scaffold_0275 | 1233144 | 1235730 | K425_832 |             |                                                                                                                                                 | Mitochondrial-processing peptidase subunit beta-like protein               |
| Mdem_scaffold_0275 | 1235764 | 1238081 | K425_838 |             |                                                                                                                                                 | Mps one binder kinase activator-like 3                                     |
| Mdem_scaffold_0275 | 1239038 | 1243130 | K425_837 |             |                                                                                                                                                 | HAUS augmin-like complex subunit 6 N-terminus domain-containing protein    |
| Mdem_scaffold_0275 | 1242766 | 1247286 | K425_833 |             |                                                                                                                                                 | kelch-like protein                                                         |
| Mdem_scaffold_0275 | 1247981 | 1252577 | K425_836 |             |                                                                                                                                                 | dnaj subfamily B member 12-like protein                                    |
| Mdem_scaffold_0275 | 1252578 | 1260449 | K425_834 |             |                                                                                                                                                 | conserved uncharacterized protein                                          |
| Mdem_scaffold_0275 | 1263113 | 1264725 | K425_835 |             |                                                                                                                                                 | nogo-B receptor-like protein                                               |
| Mdem_scaffold_0331 | 7088    | 12518   | K425_964 |             | similar to venom protein 2 from <i>Microctonus hyperodae</i>                                                                                    | conserved uncharacterized protein family 3                                 |
| Mdem_scaffold_0331 | 21310   | 24766   | K425_949 |             |                                                                                                                                                 | RNA-binding protein 28-like protein                                        |
| Mdem_scaffold_0331 | 25393   | 27549   | K425_963 |             |                                                                                                                                                 | another transcription unit-like protein                                    |
| Mdem_scaffold_0331 | 28990   | 32599   | K425_950 |             |                                                                                                                                                 | prolactin regulatory element-binding-like protein                          |
| Mdem_scaffold_0331 | 33906   | 40499   | K425_962 |             |                                                                                                                                                 | conserved uncharacterized protein family 9                                 |
| Mdem_scaffold_0331 | 86270   | 87912   | K425_961 |             |                                                                                                                                                 | hypothetical protein                                                       |
| Mdem_scaffold_0331 | 99849   | 122400  | K425_960 |             |                                                                                                                                                 | conserved uncharacterized protein family 9                                 |
| Mdem_scaffold_0331 | 135325  | 135984  | K425_959 |             |                                                                                                                                                 | hypothetical protein                                                       |
| Mdem_scaffold_0331 | 144625  | 149689  | K425_951 |             |                                                                                                                                                 | hypothetical protein                                                       |
| Mdem_scaffold_0331 | 156231  | 157613  | K425_952 |             |                                                                                                                                                 | putative reverse transcriptase                                             |
| Mdem_scaffold_0331 | 158532  | 159535  | K425_953 |             |                                                                                                                                                 | putative reverse transcriptase                                             |
| Mdem_scaffold_0331 | 174370  | 188501  | K425_954 | synonym 97b |                                                                                                                                                 | putative disintegrin and metalloprotease protein                           |
| Mdem_scaffold_0331 | 192578  | 212093  | K425_955 |             |                                                                                                                                                 | BEN-domain containing protein                                              |
| Mdem_scaffold_0331 | 244471  | 245106  | K425_958 |             | similar to GIP_L7_0070 and CcBV_31.7 from <i>Cotesia congregata</i> bracovirus                                                                  | putative reverse transcriptase and recombinase                             |
| Mdem_scaffold_0331 | 261227  | 278164  | K425_957 |             |                                                                                                                                                 | adenylate cyclase type 3-like protein                                      |

|                    |        |        |           |                  |                    |                                                                       |
|--------------------|--------|--------|-----------|------------------|--------------------|-----------------------------------------------------------------------|
| Mdem_scaffold_0331 | 280226 | 290301 | K425_956  |                  |                    | alpha-tocopherol transfer-like protein                                |
| Mdem_scaffold_0359 | 5      | 1922   | K425_996  |                  |                    | hypothetical protein                                                  |
| Mdem_scaffold_0359 | 8146   | 8628   | K425_994  | ank-V1           |                    | viral ankyrin                                                         |
| Mdem_scaffold_0359 | 8864   | 9775   | K425_995  | ptp-V2           |                    | protein tyrosine phosphatase                                          |
| Mdem_scaffold_0359 | 10821  | 11913  | K425_993  | orph-V3          |                    | conserved hypothetical protein                                        |
| Mdem_scaffold_0359 | 12169  | 15584  | K425_976  | ank-V4           |                    | viral ankyrin                                                         |
| Mdem_scaffold_0359 | 19958  | 23602  | K425_992  | orph-W1          |                    | conserved hypothetical protein family 5                               |
| Mdem_scaffold_0359 | 30049  | 31322  | K425_977  | orph-E3          |                    | conserved hypothetical protein                                        |
| Mdem_scaffold_0359 | 32008  | 33170  | K425_991  | orph-E2          |                    | conserved hypothetical protein                                        |
| Mdem_scaffold_0359 | 35045  | 36039  | K425_978  | orph-C3          |                    | hypothetical protein                                                  |
| Mdem_scaffold_0359 | 36580  | 37605  | K425_990  | orph-C4          |                    | conserved hypothetical protein                                        |
| Mdem_scaffold_0359 | 39186  | 39710  | K425_979  | ank-C1           |                    | viral ankyrin                                                         |
| Mdem_scaffold_0359 | 40022  | 40567  | K425_980  | ank-C2           |                    | viral ankyrin                                                         |
| Mdem_scaffold_0359 | 42955  | 45295  | K425_981  | orph-X1          |                    | conserved hypothetical protein                                        |
| Mdem_scaffold_0359 | 46350  | 47358  | K425_982  | orph-X2          |                    | conserved hypothetical protein                                        |
| Mdem_scaffold_0359 | 48152  | 49201  | K425_983  | orph-X3          |                    | conserved hypothetical protein                                        |
| Mdem_scaffold_0359 | 50374  | 52360  | K425_989  | orph-X4          | similar to orph-E2 | conserved hypothetical protein                                        |
| Mdem_scaffold_0359 | 52561  | 55862  | K425_984  | orph-X5          |                    | conserved hypothetical protein family 5, BEN domain-containing        |
| Mdem_scaffold_0359 | 60928  | 64291  | K425_985  |                  |                    | clathrin light chain domain-containing protein                        |
| Mdem_scaffold_0359 | 64375  | 67785  | K425_988  |                  |                    | ankyrin repeat domain-containing protein                              |
| Mdem_scaffold_0359 | 68923  | 76583  | K425_986  |                  |                    | patatin-like phospholipase domain-containing protein                  |
| Mdem_scaffold_0359 | 80597  | 81036  | K425_987  |                  |                    | conserved uncharacterized protein                                     |
| Mdem_scaffold_0394 | 6743   | 10138  | K425_1003 | lef-8            |                    | viral RNA polymerase subunit                                          |
| Mdem_scaffold_0394 | 52004  | 52660  | K425_1000 | HZNVor128-like-1 |                    | HZNVor128-like protein-1                                              |
| Mdem_scaffold_0394 | 54625  | 57186  | K425_1001 | HZNVor128-like-2 |                    | HZNVor128-like protein-2                                              |
| Mdem_scaffold_0394 | 92890  | 92961  | K425_998  |                  |                    | tRNA-Ser                                                              |
| Mdem_scaffold_0394 | 98209  | 98280  | K425_997  |                  |                    | tRNA-Ser                                                              |
| Mdem_scaffold_0394 | 99149  | 99220  | K425_999  |                  |                    | tRNA-Ser                                                              |
| Mdem_scaffold_0394 | 142915 | 143597 | K425_1002 |                  |                    | hypothetical protein                                                  |
| Mdem_scaffold_0404 | 14473  | 17692  | K425_1034 |                  |                    | putative reverse transcriptase                                        |
| Mdem_scaffold_0404 | 55800  | 73552  | K425_1033 |                  |                    | krotzkopf verkehrt-like protein                                       |
| Mdem_scaffold_0404 | 79343  | 79414  | K425_1005 |                  |                    | tRNA-Ser                                                              |
| Mdem_scaffold_0404 | 79566  | 79637  | K425_1004 |                  |                    | tRNA-Ser                                                              |
| Mdem_scaffold_0404 | 90556  | 90627  | K425_1006 |                  |                    | tRNA-Ser                                                              |
| Mdem_scaffold_0404 | 92307  | 95038  | K425_1032 |                  |                    | hypothetical protein                                                  |
| Mdem_scaffold_0404 | 104758 | 111142 | K425_1031 |                  |                    | krotzkopf verkehrt-like protein                                       |
| Mdem_scaffold_0404 | 129629 | 132889 | K425_1007 |                  |                    | reverse transcriptase-like protein                                    |
| Mdem_scaffold_0404 | 145002 | 159464 | K425_1008 |                  |                    | transporter, solute:sodium symporter (SSS) family                     |
| Mdem_scaffold_0404 | 183316 | 184791 | K425_1009 |                  |                    | conserved uncharacterized protein family 10                           |
| Mdem_scaffold_0404 | 186651 | 189606 | K425_1010 |                  |                    | conserved uncharacterized protein family 10                           |
| Mdem_scaffold_0404 | 194789 | 195791 | K425_1011 |                  |                    | conserved uncharacterized protein family 10                           |
| Mdem_scaffold_0404 | 217855 | 231614 | K425_1030 |                  |                    | E3 ubiquitin-protein ligase RNF25-like protein                        |
| Mdem_scaffold_0404 | 252603 | 254946 | K425_1029 |                  |                    | pterin-4a-carbinolamine dehydratase-like protein                      |
| Mdem_scaffold_0404 | 256406 | 260414 | K425_1012 |                  |                    | DNA-directed RNA polymerase I subunit RPA49-like protein              |
| Mdem_scaffold_0404 | 261902 | 269951 | K425_1013 |                  |                    | WW domain-containing oxidoreductase                                   |
| Mdem_scaffold_0404 | 270419 | 277817 | K425_1028 |                  |                    | mitochondrial ribosomal protein L15                                   |
| Mdem_scaffold_0404 | 280047 | 288227 | K425_1014 |                  |                    | heparan sulfate 2-O-sulfotransferase-like protein                     |
| Mdem_scaffold_0404 | 284110 | 289672 | K425_1027 |                  |                    | N-terminal methyltransferase-like protein                             |
| Mdem_scaffold_0404 | 298674 | 302982 | K425_1026 |                  |                    | NADH dehydrogenase ubiquinone 1 alpha subcomplex subunit-like protein |
| Mdem_scaffold_0404 | 304458 | 317625 | K425_1015 |                  |                    | ftsJ methyltransferase domain-containing protein 1-like protein       |
| Mdem_scaffold_0404 | 324589 | 338425 | K425_1025 |                  |                    | decaprenyl-diphosphate synthase subunit 2-like protein                |
| Mdem_scaffold_0404 | 344025 | 363183 | K425_1016 |                  |                    | vacuolar protein sorting-associated protein VTA1-like protein         |
| Mdem_scaffold_0404 | 377584 | 378300 | K425_1017 |                  |                    | putative reverse transcriptase                                        |
| Mdem_scaffold_0404 | 379806 | 381349 | K425_1018 |                  |                    | conserved uncharacterized protein                                     |
| Mdem_scaffold_0404 | 384450 | 386375 | K425_1024 | odv-e66-11       |                    | putative envelope protein ODV-E66-11                                  |
| Mdem_scaffold_0404 | 396473 | 399357 | K425_1023 |                  |                    | condensin complex subunit 2-like protein                              |
| Mdem_scaffold_0404 | 399580 | 401880 | K425_1019 |                  |                    | putative palmitoyltransferase ZDHHC24-like protein                    |
| Mdem_scaffold_0404 | 411345 | 412838 | K425_1020 |                  |                    | conserved uncharacterized protein                                     |
| Mdem_scaffold_0404 | 412896 | 413891 | K425_1021 |                  |                    | putative reverse transcriptase                                        |
| Mdem_scaffold_0404 | 483574 | 486028 | K425_1022 |                  |                    | conserved uncharacterized protein                                     |
| Mdem_scaffold_0407 | 3553   | 15755  | K425_1224 |                  |                    | g1/S-specific cyclin-D2-like protein                                  |
| Mdem_scaffold_0407 | 50358  | 55857  | K425_1223 |                  |                    | conserved uncharacterized protein                                     |
| Mdem_scaffold_0407 | 50416  | 51641  | K425_1037 |                  |                    | cell cycle control protein cwf16-like protein                         |
| Mdem_scaffold_0407 | 55606  | 66122  | K425_1038 |                  |                    | spondin-like protein                                                  |
| Mdem_scaffold_0407 | 66113  | 67652  | K425_1222 |                  |                    | translation initiation factor-3 (IF3), putative                       |
| Mdem_scaffold_0407 | 67426  | 68716  | K425_1039 |                  |                    | conserved uncharacterized protein                                     |
| Mdem_scaffold_0407 | 68571  | 69975  | K425_1221 |                  |                    | conserved uncharacterized protein                                     |
| Mdem_scaffold_0407 | 71384  | 74204  | K425_1220 |                  |                    | RING finger domain-containing protein                                 |
| Mdem_scaffold_0407 | 74979  | 77364  | K425_1219 |                  |                    | glucose dehydrogenase acceptor-like protein                           |
| Mdem_scaffold_0407 | 78579  | 82896  | K425_1218 |                  |                    | glucose dehydrogenase acceptor-like protein                           |
| Mdem_scaffold_0407 | 83841  | 87035  | K425_1217 |                  |                    | glucose dehydrogenase acceptor-like protein                           |
| Mdem_scaffold_0407 | 88466  | 93299  | K425_1216 |                  |                    | glucose dehydrogenase acceptor-like protein                           |
| Mdem_scaffold_0407 | 93974  | 96542  | K425_1215 |                  |                    | glucose dehydrogenase acceptor-like protein                           |
| Mdem_scaffold_0407 | 97171  | 99048  | K425_1214 |                  |                    | glucose dehydrogenase acceptor-like protein                           |
| Mdem_scaffold_0407 | 99849  | 101726 | K425_1213 |                  |                    | glucose dehydrogenase acceptor-like protein                           |
| Mdem_scaffold_0407 | 102228 | 104111 | K425_1212 |                  |                    | glucose dehydrogenase acceptor-like protein                           |
| Mdem_scaffold_0407 | 104682 | 106526 | K425_1211 |                  |                    | glucose dehydrogenase acceptor-like protein                           |
| Mdem_scaffold_0407 | 107118 | 108983 | K425_1210 |                  |                    | glucose dehydrogenase acceptor-like protein                           |
| Mdem_scaffold_0407 | 109643 | 111520 | K425_1209 |                  |                    | glucose dehydrogenase acceptor-like protein                           |
| Mdem_scaffold_0407 | 112048 | 113604 | K425_1208 |                  |                    | glucose dehydrogenase acceptor-like protein                           |
| Mdem_scaffold_0407 | 115236 | 119495 | K425_1207 |                  |                    | glucose dehydrogenase acceptor-like protein                           |
| Mdem_scaffold_0407 | 118767 | 122600 | K425_1040 |                  |                    | flotillin-2-like protein                                              |

|                    |         |         |           |                                      |  |                                                                            |
|--------------------|---------|---------|-----------|--------------------------------------|--|----------------------------------------------------------------------------|
| Mdem_scaffold_0407 | 126887  | 140923  | K425_1205 |                                      |  | Phosphorylase b kinase gamma catalytic chain, skeletal muscle-like protein |
| Mdem_scaffold_0407 | 141449  | 144373  | K425_1206 |                                      |  | phosphorylase kinase gamma-like protein                                    |
| Mdem_scaffold_0407 | 152053  | 156126  | K425_1204 |                                      |  | arginine-tRNA ligase                                                       |
| Mdem_scaffold_0407 | 155011  | 162808  | K425_1041 |                                      |  | adenylate cyclase type 9-like protein                                      |
| Mdem_scaffold_0407 | 163358  | 170123  | K425_1203 |                                      |  | chaoptin-like protein                                                      |
| Mdem_scaffold_0407 | 171515  | 179491  | K425_1202 |                                      |  | silver-like protein                                                        |
| Mdem_scaffold_0407 | 179862  | 184065  | K425_1042 |                                      |  | shawin-like protein                                                        |
| Mdem_scaffold_0407 | 180106  | 181555  | K425_1201 |                                      |  | Coiled-coil domain-containing protein                                      |
| Mdem_scaffold_0407 | 184073  | 185866  | K425_1043 |                                      |  | transcriptional adapter 3-B-like protein                                   |
| Mdem_scaffold_0407 | 186961  | 189745  | K425_1200 |                                      |  | ATP synthase lipid-binding protein, mitochondrial-like protein             |
| Mdem_scaffold_0407 | 189745  | 191332  | K425_1044 |                                      |  | conserved uncharacterized protein                                          |
| Mdem_scaffold_0407 | 196614  | 199530  | K425_1199 |                                      |  | AN1-type zinc finger protein 6-like protein                                |
| Mdem_scaffold_0407 | 203503  | 208330  | K425_1045 |                                      |  | YL-1-like protein                                                          |
| Mdem_scaffold_0407 | 207945  | 213796  | K425_1198 |                                      |  | ras-related protein Rab-11A-like protein                                   |
| Mdem_scaffold_0407 | 213964  | 218413  | K425_1046 |                                      |  | post-GPI attachment to proteins factor 2-like protein                      |
| Mdem_scaffold_0407 | 274662  | 288908  | K425_1047 |                                      |  | scalloped-like protein                                                     |
| Mdem_scaffold_0407 | 298940  | 307159  | K425_1197 |                                      |  | caudal-like protein                                                        |
| Mdem_scaffold_0407 | 316878  | 321380  | K425_1048 |                                      |  | conserved uncharacterized protein                                          |
| Mdem_scaffold_0407 | 321358  | 323835  | K425_1196 |                                      |  | conserved uncharacterized protein                                          |
| Mdem_scaffold_0407 | 324230  | 326296  | K425_1049 |                                      |  | lipase 3-like protein                                                      |
| Mdem_scaffold_0407 | 326672  | 328839  | K425_1050 |                                      |  | lipase 3-like protein                                                      |
| Mdem_scaffold_0407 | 329359  | 340300  | K425_1051 |                                      |  | guanine nucleotide exchange factor for Rab-3A-like protein                 |
| Mdem_scaffold_0407 | 341223  | 343740  | K425_1195 |                                      |  | conserved uncharacterized protein                                          |
| Mdem_scaffold_0407 | 345330  | 351916  | K425_1194 |                                      |  | supernumerary limbs-like protein                                           |
| Mdem_scaffold_0407 | 352427  | 354165  | K425_1193 |                                      |  | phosphatidate phosphatase PPAPDC1A-like protein                            |
| Mdem_scaffold_0407 | 353530  | 358949  | K425_1052 |                                      |  | Abhydrolase domain-containing protein                                      |
| Mdem_scaffold_0407 | 358828  | 360213  | K425_1192 |                                      |  | crossover junction endonuclease EME1-like protein                          |
| Mdem_scaffold_0407 | 362566  | 365722  | K425_1191 |                                      |  | protein SAAL1-like protein                                                 |
| Mdem_scaffold_0407 | 364483  | 373899  | K425_1053 |                                      |  | disintegrin and metalloproteinase domain-containing protein                |
| Mdem_scaffold_0407 | 375411  | 377969  | K425_1190 |                                      |  | transmembrane protein 129-like protein                                     |
| Mdem_scaffold_0407 | 499220  | 505085  | K425_1054 |                                      |  | conserved uncharacterized protein                                          |
| Mdem_scaffold_0407 | 507653  | 513193  | K425_1189 |                                      |  | glycosyltransferase-like protein LARGE1                                    |
| Mdem_scaffold_0407 | 513701  | 520640  | K425_1187 |                                      |  | extracellular domains-containing protein CG31004-like protein              |
| Mdem_scaffold_0407 | 521445  | 523705  | K425_1188 |                                      |  | Pop2-like protein                                                          |
| Mdem_scaffold_0407 | 524522  | 529077  | K425_1055 |                                      |  | BTB/POZ domain-containing protein KCTD9-like protein                       |
| Mdem_scaffold_0407 | 553456  | 555659  | K425_1056 |                                      |  | hypothetical protein                                                       |
| Mdem_scaffold_0407 | 556773  | 558781  | K425_1057 |                                      |  | hypothetical protein                                                       |
| Mdem_scaffold_0407 | 593514  | 595594  | K425_1186 |                                      |  | MFS sugar transporter domain-containing protein                            |
| Mdem_scaffold_0407 | 623796  | 629475  | K425_1058 |                                      |  | octopamine receptor beta-2R-like protein                                   |
| Mdem_scaffold_0407 | 636511  | 640741  | K425_1059 |                                      |  | conserved uncharacterized protein                                          |
| Mdem_scaffold_0407 | 638673  | 646530  | K425_1185 |                                      |  | DNA-directed RNA polymerase II subunit RPB2-like protein                   |
| Mdem_scaffold_0407 | 647994  | 649391  | K425_1060 |                                      |  | thioredoxin-dependent peroxide reductase, mitochondrial-like protein       |
| Mdem_scaffold_0407 | 660088  | 661165  | K425_1184 |                                      |  | Homeobox domain-containing protein                                         |
| Mdem_scaffold_0407 | 692223  | 696649  | K425_1183 |                                      |  | EB module-containing protein                                               |
| Mdem_scaffold_0407 | 704420  | 710970  | K425_1182 |                                      |  | Homeobox domain-containing protein                                         |
| Mdem_scaffold_0407 | 734925  | 736286  | K425_1061 |                                      |  | mitochondrial ribosomal protein L2                                         |
| Mdem_scaffold_0407 | 735481  | 739534  | K425_1181 |                                      |  | sideroflexin-1-like protein                                                |
| Mdem_scaffold_0407 | 743183  | 745719  | K425_1062 |                                      |  | osiris 1-like protein                                                      |
| Mdem_scaffold_0407 | 748246  | 752632  | K425_1063 |                                      |  | osiris 24-like protein                                                     |
| Mdem_scaffold_0407 | 754200  | 757541  | K425_1064 |                                      |  | osiris 2-like protein                                                      |
| Mdem_scaffold_0407 | 762068  | 764056  | K425_1065 |                                      |  | osiris 3-like protein                                                      |
| Mdem_scaffold_0407 | 776743  | 778299  | K425_1066 |                                      |  | osiris 6-like protein                                                      |
| Mdem_scaffold_0407 | 785803  | 789079  | K425_1067 |                                      |  | osiris 7-like protein                                                      |
| Mdem_scaffold_0407 | 795427  | 796838  | K425_1069 |                                      |  | osiris 8-like protein                                                      |
| Mdem_scaffold_0407 | 800732  | 802186  | K425_1068 |                                      |  | osiris 9-like protein                                                      |
| Mdem_scaffold_0407 | 803327  | 804871  | K425_1070 |                                      |  | osiris 10-like protein                                                     |
| Mdem_scaffold_0407 | 805458  | 808224  | K425_1071 |                                      |  | osiris 11-like protein                                                     |
| Mdem_scaffold_0407 | 809411  | 811394  | K425_1180 |                                      |  | osiris 11-like protein                                                     |
| Mdem_scaffold_0407 | 810240  | 810313  | K425_1036 |                                      |  | tRNA-Thr                                                                   |
| Mdem_scaffold_0407 | 816858  | 818333  | K425_1072 |                                      |  | osiris 12-like protein                                                     |
| Mdem_scaffold_0407 | 827071  | 829041  | K425_1073 |                                      |  | osiris 14-like protein                                                     |
| Mdem_scaffold_0407 | 838269  | 841579  | K425_1074 |                                      |  | osiris 16-like protein                                                     |
| Mdem_scaffold_0407 | 846642  | 853388  | K425_1075 |                                      |  | osiris 17-like protein                                                     |
| Mdem_scaffold_0407 | 853370  | 853459  | K425_1035 |                                      |  | tRNA-Ile                                                                   |
| Mdem_scaffold_0407 | 854463  | 855643  | K425_1179 |                                      |  | Odorant-binding protein 56-like protein                                    |
| Mdem_scaffold_0407 | 856373  | 857824  | K425_1178 |                                      |  | Odorant-binding protein 56-like protein                                    |
| Mdem_scaffold_0407 | 860594  | 862487  | K425_1077 |                                      |  | Odorant-binding protein 56-like protein                                    |
| Mdem_scaffold_0407 | 862825  | 864425  | K425_1076 |                                      |  | Odorant-binding protein 56-like protein                                    |
| Mdem_scaffold_0407 | 865755  | 867091  | K425_1177 |                                      |  | osiris 20-like protein                                                     |
| Mdem_scaffold_0407 | 869283  | 870458  | K425_1175 |                                      |  | osiris 19-like protein                                                     |
| Mdem_scaffold_0407 | 872566  | 873613  | K425_1176 |                                      |  | osiris 18-like protein                                                     |
| Mdem_scaffold_0407 | 874601  | 877476  | K425_1078 |                                      |  | conserved uncharacterized protein family 3                                 |
| Mdem_scaffold_0407 | 878508  | 881134  | K425_1079 |                                      |  | conserved uncharacterized protein                                          |
| Mdem_scaffold_0407 | 879655  | 880932  | K425_1174 |                                      |  | ankyrin-repeat domain-containing protein                                   |
| Mdem_scaffold_0407 | 881472  | 882736  | K425_1173 |                                      |  | conserved uncharacterized protein                                          |
| Mdem_scaffold_0407 | 883353  | 887623  | K425_1080 |                                      |  | general transcription factor IIF subunit 3-like protein                    |
| Mdem_scaffold_0407 | 929075  | 930914  | K425_1172 |                                      |  | octopamine receptor alpha-1B-like protein                                  |
| Mdem_scaffold_0407 | 946939  | 947937  | K425_1171 |                                      |  | conserved uncharacterized protein                                          |
| Mdem_scaffold_0407 | 1001558 | 1003024 | K425_1170 |                                      |  | octopamine receptor alpha-1B-like protein, partial                         |
| Mdem_scaffold_0407 | 1052912 | 1058686 | K425_1081 |                                      |  | transporter, solute:sodium symporter (SSS) family                          |
| Mdem_scaffold_0407 | 1063363 | 1075192 | K425_1082 | similar to GfV-B16-ORF1-like protein |  | conserved uncharacterized protein family 6                                 |
| Mdem_scaffold_0407 | 1124654 | 1129685 | K425_1083 |                                      |  | sorting nexin-4-like protein                                               |

|                           |                |                |                  |              |  |                                                                              |
|---------------------------|----------------|----------------|------------------|--------------|--|------------------------------------------------------------------------------|
| Mdem_scaffold_0407        | 1133670        | 1149986        | K425_1169        |              |  | pyrokinin 1 receptor-like protein                                            |
| Mdem_scaffold_0407        | 1156678        | 1162916        | K425_1168        |              |  | Neutral ceramidase-like protein                                              |
| Mdem_scaffold_0407        | 1172993        | 1174595        | K425_1084        |              |  | cuticle-like protein                                                         |
| Mdem_scaffold_0407        | 1176263        | 1177108        | K425_1085        |              |  | cuticle-like protein                                                         |
| Mdem_scaffold_0407        | 1180140        | 1180921        | K425_1086        |              |  | cuticle-like protein                                                         |
| Mdem_scaffold_0407        | 1181331        | 1185656        | K425_1167        |              |  | Neutral ceramidase-like protein                                              |
| Mdem_scaffold_0407        | 1189130        | 1199193        | K425_1087        |              |  | serine protease nudel-like protein                                           |
| Mdem_scaffold_0407        | 1204570        | 1232948        | K425_1088        |              |  | uninflatable-like protein                                                    |
| Mdem_scaffold_0407        | 1234303        | 1235960        | K425_1089        |              |  | pomp-like protein                                                            |
| Mdem_scaffold_0407        | 1235959        | 1239348        | K425_1166        |              |  | n-acetyllactosaminide beta-1,3-N-acetylglucosaminyltransferase-like protein  |
| Mdem_scaffold_0407        | 1239180        | 1242154        | K425_1090        |              |  | conserved uncharacterized protein                                            |
| Mdem_scaffold_0407        | 1240310        | 1243691        | K425_1165        |              |  | Haloacid dehalogenase-like hydrolase domain-containing protein               |
| Mdem_scaffold_0407        | 1244171        | 1250817        | K425_1164        |              |  | ubiquitin thioesterase trabd-like protein, partial                           |
| Mdem_scaffold_0407        | 1253105        | 1259047        | K425_1163        |              |  | dihydroxyacetone phosphate acyltransferase-like protein                      |
| Mdem_scaffold_0407        | 1259359        | 1262521        | K425_1091        |              |  | pinin-like protein                                                           |
| Mdem_scaffold_0407        | 1279076        | 1280688        | K425_1162        |              |  | conserved uncharacterized protein                                            |
| Mdem_scaffold_0407        | 1281333        | 1282949        | K425_1092        |              |  | conserved uncharacterized protein                                            |
| Mdem_scaffold_0407        | 1281969        | 1285201        | K425_1161        |              |  | 4-hydroxybenzoate polyprenyl transferase                                     |
| Mdem_scaffold_0407        | 1285338        | 1289135        | K425_1093        |              |  | Abhydrolase domain-containing protein                                        |
| Mdem_scaffold_0407        | 1289894        | 1300024        | K425_1094        |              |  | la-related protein 1-like protein                                            |
| Mdem_scaffold_0407        | 1313349        | 1316693        | K425_1160        |              |  | Heart- and neural crest derivatives-expressed protein 2-like protein         |
| Mdem_scaffold_0407        | 1324463        | 1327272        | K425_1159        |              |  | UMP-CMP kinase-like protein                                                  |
| Mdem_scaffold_0407        | 1329834        | 1332574        | K425_1158        |              |  | pointed-like protein                                                         |
| Mdem_scaffold_0407        | 1339535        | 1342204        | K425_1157        |              |  | pointed-like protein                                                         |
| Mdem_scaffold_0407        | 1384530        | 1388592        | K425_1095        |              |  | mitochondrial ATP synthase coupling factor 6-like protein                    |
| Mdem_scaffold_0407        | 1389086        | 1392437        | K425_1096        |              |  | conserved uncharacterized protein                                            |
| <b>Mdem_scaffold_0407</b> | <b>1392006</b> | <b>1393626</b> | <b>K425_1156</b> | <b>lef-4</b> |  | <b>viral RNA polymerase subunit lef-4</b>                                    |
| Mdem_scaffold_0407        | 1402394        | 1406469        | K425_1155        |              |  | Endoribonuclease XendoU domain-containing protein                            |
| Mdem_scaffold_0407        | 1406581        | 1409732        | K425_1154        |              |  | glyoxalase domain-containing protein 4-like protein                          |
| Mdem_scaffold_0407        | 1410036        | 1416206        | K425_1097        |              |  | proline--tRNA ligase                                                         |
| Mdem_scaffold_0407        | 1416218        | 1423469        | K425_1153        |              |  | DNA polymerase epsilon catalytic subunit A-like protein                      |
| Mdem_scaffold_0407        | 1423789        | 1425949        | K425_1152        |              |  | conserved uncharacterized protein                                            |
| Mdem_scaffold_0407        | 1432100        | 1435504        | K425_1098        |              |  | ubiquitin carboxyl-terminal hydrolase 46-like protein                        |
| Mdem_scaffold_0407        | 1435513        | 1436638        | K425_1151        |              |  | 60S ribosomal protein L21                                                    |
| Mdem_scaffold_0407        | 1436822        | 1437889        | K425_1150        |              |  | 60S ribosomal protein L21                                                    |
| Mdem_scaffold_0407        | 1446863        | 1451768        | K425_1148        |              |  | Bardet-Biedl syndrome 5-like protein                                         |
| Mdem_scaffold_0407        | 1447024        | 1448283        | K425_1099        |              |  | conserved uncharacterized protein                                            |
| Mdem_scaffold_0407        | 1451868        | 1455993        | K425_1100        |              |  | SCY1-like protein 2-like protein                                             |
| Mdem_scaffold_0407        | 1456676        | 1460183        | K425_1101        |              |  | xaa-Pro aminopeptidase 1-like protein                                        |
| Mdem_scaffold_0407        | 1464799        | 1471631        | K425_1147        |              |  | conserved uncharacterized protein                                            |
| Mdem_scaffold_0407        | 1495630        | 1498182        | K425_1102        |              |  | nuclear receptor-binding factor 2-like protein                               |
| Mdem_scaffold_0407        | 1498976        | 1499951        | K425_1146        |              |  | putative odorant receptor                                                    |
| Mdem_scaffold_0407        | 1506924        | 1508550        | K425_1145        |              |  | putative odorant receptor                                                    |
| Mdem_scaffold_0407        | 1510311        | 1515599        | K425_1103        |              |  | conserved uncharacterized protein                                            |
| Mdem_scaffold_0407        | 1515733        | 1518846        | K425_1144        |              |  | dead end-like protein                                                        |
| Mdem_scaffold_0407        | 1589808        | 1603155        | K425_1104        |              |  | mushroom body large-type Kenyon cell-specific-like protein                   |
| Mdem_scaffold_0407        | 1624163        | 1628728        | K425_1105        |              |  | pyruvate dehydrogenase complex dihydrolipoamide acetyltransferase            |
| Mdem_scaffold_0407        | 1629497        | 1632609        | K425_1143        |              |  | serine/threonine-protein kinase PAK 1-like protein                           |
| Mdem_scaffold_0407        | 1633385        | 1637030        | K425_1106        |              |  | merlin-like protein                                                          |
| Mdem_scaffold_0407        | 1637521        | 1639682        | K425_1107        |              |  | 2-methoxy-6-polyprenyl-1,4-benzoquinol methylase, mitochondrial-like protein |
| Mdem_scaffold_0407        | 1640121        | 1642312        | K425_1142        |              |  | cytoplasmic dynein light chain 2-like protein                                |
| Mdem_scaffold_0407        | 1643503        | 1646867        | K425_1108        |              |  | serine/arginine-rich splicing factor 1-like protein                          |
| Mdem_scaffold_0407        | 1649504        | 1653908        | K425_1109        |              |  | whacked-like protein                                                         |
| Mdem_scaffold_0407        | 1653909        | 1657469        | K425_1141        |              |  | BRCA1-associated-like protein                                                |
| Mdem_scaffold_0407        | 1656954        | 1660401        | K425_1110        |              |  | putative neutral sphingomyelinase-like protein                               |
| Mdem_scaffold_0407        | 1658263        | 1668639        | K425_1140        |              |  | rho GTPase-activating protein 10-like protein                                |
| Mdem_scaffold_0407        | 1669702        | 1675748        | K425_1112        |              |  | branched-chain amino acid aminotransferase                                   |
| Mdem_scaffold_0407        | 1676865        | 1684825        | K425_1111        |              |  | octopamine receptor beta-1R-like protein                                     |
| Mdem_scaffold_0407        | 1680673        | 1682622        | K425_1139        |              |  | hypothetical protein                                                         |
| Mdem_scaffold_0407        | 1687019        | 1690080        | K425_1138        |              |  | NAD-dependent deacetylase sirtuin-2-like protein                             |
| Mdem_scaffold_0407        | 1689056        | 1703094        | K425_1113        |              |  | vacuolar protein sorting-associated protein 13B-like protein                 |
| Mdem_scaffold_0407        | 1702818        | 1704602        | K425_1136        |              |  | clathrin coat assembly protein ap17-like protein                             |
| Mdem_scaffold_0407        | 1704992        | 1705937        | K425_1114        |              |  | Trafficking protein particle complex subunit 6B-like protein                 |
| Mdem_scaffold_0407        | 1705938        | 1710689        | K425_1137        |              |  | rab proteins geranylgeranyltransferase component A-like protein              |
| Mdem_scaffold_0407        | 1712064        | 1716313        | K425_1115        |              |  | calnexin-like protein                                                        |
| Mdem_scaffold_0407        | 1716314        | 1720039        | K425_1135        |              |  | myotubularin-related protein 8-like protein                                  |
| Mdem_scaffold_0407        | 1721297        | 1726407        | K425_1116        |              |  | Brain tumor-like protein                                                     |
| Mdem_scaffold_0407        | 1735748        | 1738398        | K425_1134        |              |  | ric8a-like protein                                                           |
| Mdem_scaffold_0407        | 1738399        | 1740221        | K425_1117        |              |  | TGF-beta-activated kinase 1 and MAP3K7-binding-like protein                  |
| Mdem_scaffold_0407        | 1740946        | 1744442        | K425_1133        |              |  | 4-hydroxybutyrate coenzyme A transferase                                     |
| Mdem_scaffold_0407        | 1744917        | 1747967        | K425_1118        |              |  | V-type ATPase, B subunit                                                     |
| Mdem_scaffold_0407        | 1749526        | 1755927        | K425_1119        |              |  | glycerol-3-phosphate acyltransferase 1, mitochondrial-like protein           |
| Mdem_scaffold_0407        | 1755932        | 1758312        | K425_1132        |              |  | tektin-like protein                                                          |
| Mdem_scaffold_0407        | 1758680        | 1761081        | K425_1120        |              |  | tektin-like protein                                                          |
| Mdem_scaffold_0407        | 1780179        | 1794502        | K425_1121        |              |  | empty spiracles-like protein                                                 |
| Mdem_scaffold_0407        | 1864494        | 1868625        | K425_1122        |              |  | Bromodomain-containing protein                                               |
| Mdem_scaffold_0407        | 1868954        | 1869991        | K425_1123        |              |  | clavesin-2-like protein                                                      |
| Mdem_scaffold_0407        | 1871938        | 1874170        | K425_1124        |              |  | clavesin-2-like protein                                                      |
| Mdem_scaffold_0407        | 1874764        | 1877474        | K425_1125        |              |  | cuticular protein 57A-like protein                                           |
| Mdem_scaffold_0407        | 1876039        | 1878588        | K425_1131        |              |  | synaptosomal-associated protein 29-like protein                              |
| Mdem_scaffold_0407        | 1879244        | 1881866        | K425_1126        |              |  | lactosylceramide 4-alpha-galactosyltransferase-like protein                  |

|                    |         |         |           |             |                                                                       |                                                                         |
|--------------------|---------|---------|-----------|-------------|-----------------------------------------------------------------------|-------------------------------------------------------------------------|
| Mdem_scaffold_0407 | 1886315 | 1900782 | K425_1130 |             |                                                                       | twins-like protein                                                      |
| Mdem_scaffold_0407 | 1901565 | 1907675 | K425_1129 |             |                                                                       | conserved uncharacterized protein                                       |
| Mdem_scaffold_0407 | 1907839 | 1909172 | K425_1127 |             |                                                                       | Phosphoglycerate mutase family member 5-like protein                    |
| Mdem_scaffold_0407 | 1912958 | 1916670 | K425_1128 |             |                                                                       | tyrosine-protein kinase Btk29A-like protein                             |
| Mdem_scaffold_0412 | 525     | 6328    | K425_1346 |             |                                                                       | ALK tyrosine kinase receptor-like protein                               |
| Mdem_scaffold_0412 | 10520   | 12270   | K425_1314 |             |                                                                       | ribonuclease H2 subunit C-like protein                                  |
| Mdem_scaffold_0412 | 12257   | 16839   | K425_1345 |             |                                                                       | Transmembrane channel-like protein 7                                    |
| Mdem_scaffold_0412 | 16600   | 19337   | K425_1315 |             |                                                                       | PPPDE peptidase domain-containing protein 1                             |
| Mdem_scaffold_0412 | 21239   | 23986   | K425_1323 | orph-H1     |                                                                       | conserved uncharacterized protein                                       |
| Mdem_scaffold_0412 | 21917   | 23659   | K425_1340 | ank-H4      | synonym Ikb-H1                                                        | viral ankyrin                                                           |
| Mdem_scaffold_0412 | 23926   | 24888   | K425_1341 | ptp-H3      |                                                                       | protein tyrosine phosphatase                                            |
| Mdem_scaffold_0412 | 25337   | 26983   | K425_1316 | ptp-H2      |                                                                       | protein tyrosine phosphatase                                            |
| Mdem_scaffold_0412 | 27569   | 28579   | K425_1342 | ptp-H1      |                                                                       | protein tyrosine phosphatase                                            |
| Mdem_scaffold_0412 | 29700   | 30659   | K425_1343 | ptp-H5      |                                                                       | protein tyrosine phosphatase                                            |
| Mdem_scaffold_0412 | 31477   | 32025   | K425_1344 | ptp-H4      |                                                                       | protein tyrosine phosphatase                                            |
| Mdem_scaffold_0412 | 38285   | 48737   | K425_1339 |             |                                                                       | genghis khan-like protein                                               |
| Mdem_scaffold_0412 | 49104   | 50685   | K425_1317 |             |                                                                       | sorting nexin-24-like protein                                           |
| Mdem_scaffold_0412 | 56573   | 80993   | K425_1338 |             |                                                                       | semaphorin-1A-like protein                                              |
| Mdem_scaffold_0412 | 161818  | 165147  | K425_1337 |             |                                                                       | Abhydrolase domain-containing protein                                   |
| Mdem_scaffold_0412 | 165572  | 166947  | K425_1336 |             |                                                                       | SUN domain-containing-like protein                                      |
| Mdem_scaffold_0412 | 166525  | 172129  | K425_1318 |             |                                                                       | Zinc finger FYVE domain-containing protein                              |
| Mdem_scaffold_0412 | 169594  | 176060  | K425_1335 |             |                                                                       | BAG domain-containing protein                                           |
| Mdem_scaffold_0412 | 183868  | 187675  | K425_1334 |             |                                                                       | HEAT repeat-containing protein                                          |
| Mdem_scaffold_0412 | 188107  | 191063  | K425_1319 |             |                                                                       | zucchini-like protein                                                   |
| Mdem_scaffold_0412 | 189806  | 191427  | K425_1333 |             |                                                                       | peroxisomal membrane protein 11-like protein                            |
| Mdem_scaffold_0412 | 191154  | 195413  | K425_1320 |             |                                                                       | non-lysosomal glucosylceramidase-like protein                           |
| Mdem_scaffold_0412 | 195195  | 199387  | K425_1332 |             |                                                                       | cytochrome P450 domain-containing protein                               |
| Mdem_scaffold_0412 | 203905  | 206991  | K425_1321 |             |                                                                       | pro-resilin-like protein, partial                                       |
| Mdem_scaffold_0412 | 209017  | 209829  | K425_1331 |             |                                                                       | pro-resilin-like protein                                                |
| Mdem_scaffold_0412 | 220403  | 221030  | K425_1330 |             |                                                                       | pro-resilin-like protein                                                |
| Mdem_scaffold_0412 | 222808  | 226121  | K425_1329 |             |                                                                       | pro-resilin-like protein, partial                                       |
| Mdem_scaffold_0412 | 236501  | 238147  | K425_1328 |             |                                                                       | pro-resilin-like protein                                                |
| Mdem_scaffold_0412 | 260968  | 263754  | K425_1327 |             |                                                                       | pro-resilin-like protein, partial                                       |
| Mdem_scaffold_0412 | 270135  | 271607  | K425_1326 |             |                                                                       | pro-resilin-like protein                                                |
| Mdem_scaffold_0412 | 285908  | 292502  | K425_1325 |             |                                                                       | hypothetical protein                                                    |
| Mdem_scaffold_0412 | 311239  | 321158  | K425_1324 |             |                                                                       | conserved uncharacterized protein                                       |
| Mdem_scaffold_0412 | 360440  | 394948  | K425_1322 |             |                                                                       | hemicentin-1-like protein                                               |
| Mdem_scaffold_0435 | 8125    | 10105   | K425_1347 |             |                                                                       | EB module-containing protein                                            |
| Mdem_scaffold_0435 | 14900   | 19898   | K425_1348 |             |                                                                       | carboxylesterase domain-containing protein                              |
| Mdem_scaffold_0435 | 24098   | 24889   | K425_1349 |             |                                                                       | carboxylesterase domain-containing protein                              |
| Mdem_scaffold_0435 | 27844   | 29110   | K425_1357 | ac92-like-2 | similar to HzNVorf13                                                  | ac92-like protein, putative sulfhydryl oxidase-2                        |
| Mdem_scaffold_0435 | 30798   | 31310   | K425_1356 |             |                                                                       | putative reverse transcriptase                                          |
| Mdem_scaffold_0435 | 31335   | 32008   | K425_1355 |             | similar to hypothetical protein Cotesia conregata bracovirus CcBV_2.3 | conserved uncharacterized protein                                       |
| Mdem_scaffold_0435 | 32387   | 33358   | K425_1354 |             | similar to hypothetical protein Cotesia conregata bracovirus CcBV_2.3 | conserved uncharacterized protein                                       |
| Mdem_scaffold_0435 | 34225   | 35034   | K425_1350 |             |                                                                       | hypothetical protein                                                    |
| Mdem_scaffold_0435 | 39651   | 41123   | K425_1351 |             |                                                                       | putative reverse transcriptase                                          |
| Mdem_scaffold_0435 | 41896   | 43026   | K425_1353 |             |                                                                       | hypothetical protein                                                    |
| Mdem_scaffold_0435 | 44348   | 61979   | K425_1352 |             |                                                                       | katanin 60-like protein                                                 |
| Mdem_scaffold_0446 | 7491    | 14396   | K425_1358 |             |                                                                       | ribose-phosphate diphosphokinase-like protein                           |
| Mdem_scaffold_0446 | 15523   | 23916   | K425_1359 |             |                                                                       | RHO protein GDP dissociation inhibitor domain-containing protein        |
| Mdem_scaffold_0446 | 36373   | 41947   | K425_1360 |             |                                                                       | singed-like protein                                                     |
| Mdem_scaffold_0446 | 43847   | 55414   | K425_1369 |             |                                                                       | ribonuclease Z, mitochondrial-like protein                              |
| Mdem_scaffold_0446 | 56195   | 58721   | K425_1361 |             |                                                                       | hypothetical protein                                                    |
| Mdem_scaffold_0446 | 68589   | 71086   | K425_1368 |             |                                                                       | UDP-glucuronosyl and UDP-glucosyl transferase domain-containing protein |
| Mdem_scaffold_0446 | 79263   | 79535   | K425_1367 | orph-R1     |                                                                       | conserved hypothetical protein                                          |
| Mdem_scaffold_0446 | 86089   | 86364   | K425_1366 |             |                                                                       | histone H4 replacement-like protein                                     |
| Mdem_scaffold_0446 | 86570   | 87155   | K425_1362 |             |                                                                       | histone H3-like protein                                                 |
| Mdem_scaffold_0446 | 86893   | 87159   | K425_1365 |             |                                                                       | histone H3-like protein                                                 |
| Mdem_scaffold_0446 | 90079   | 90680   | K425_1364 |             |                                                                       | histone H2B-like protein                                                |
| Mdem_scaffold_0446 | 90470   | 91283   | K425_1363 |             |                                                                       | histone H2A-like protein                                                |
| Mdem_scaffold_0528 | 99881   | 124927  | K425_1503 |             |                                                                       | mushroom-body expressed-like protein                                    |
| Mdem_scaffold_0528 | 145754  | 149257  | K425_1541 |             |                                                                       | alpha-tubulin-like protein                                              |
| Mdem_scaffold_0528 | 152617  | 153591  | K425_1540 |             |                                                                       | conserved uncharacterized protein                                       |
| Mdem_scaffold_0528 | 153864  | 153939  | K425_1501 |             |                                                                       | tRNA-Arg                                                                |
| Mdem_scaffold_0528 | 157132  | 158739  | K425_1539 |             |                                                                       | hypothetical protein                                                    |
| Mdem_scaffold_0528 | 160211  | 163528  | K425_1538 |             |                                                                       | hypothetical protein                                                    |
| Mdem_scaffold_0528 | 161621  | 167941  | K425_1504 |             |                                                                       | rough-like protein                                                      |
| Mdem_scaffold_0528 | 173251  | 179239  | K425_1537 |             |                                                                       | conserved uncharacterized protein                                       |
| Mdem_scaffold_0528 | 181415  | 183759  | K425_1505 |             |                                                                       | tolkin, partial                                                         |
| Mdem_scaffold_0528 | 187700  | 194057  | K425_1506 |             |                                                                       | tolkin, partial                                                         |
| Mdem_scaffold_0528 | 195209  | 196853  | K425_1507 |             |                                                                       | tolkin, partial                                                         |
| Mdem_scaffold_0528 | 197420  | 197978  | K425_1508 |             |                                                                       | tolloid, partial                                                        |
| Mdem_scaffold_0528 | 242044  | 250682  | K425_1509 |             |                                                                       | Angiotensin-converting enzyme-like protein                              |
| Mdem_scaffold_0528 | 250859  | 252889  | K425_1535 |             |                                                                       | cuticular-like protein                                                  |
| Mdem_scaffold_0528 | 256103  | 259840  | K425_1536 |             |                                                                       | cuticular-like protein                                                  |
| Mdem_scaffold_0528 | 267238  | 270415  | K425_1534 |             |                                                                       | cuticular-like protein                                                  |
| Mdem_scaffold_0528 | 287844  | 303637  | K425_1510 |             |                                                                       | conserved uncharacterized protein                                       |
| Mdem_scaffold_0528 | 304900  | 308317  | K425_1511 |             |                                                                       | egf domain-containing protein                                           |
| Mdem_scaffold_0528 | 309679  | 323617  | K425_1512 |             |                                                                       | conserved uncharacterized protein                                       |
| Mdem_scaffold_0528 | 325486  | 326274  | K425_1513 |             |                                                                       | 7tm chemosensory receptor domain-containing protein                     |



|                           |               |               |                  |                   |                                                                                              |                                                                     |
|---------------------------|---------------|---------------|------------------|-------------------|----------------------------------------------------------------------------------------------|---------------------------------------------------------------------|
| Mdem_scaffold_0528        | 327277        | 332347        | K425_1533        |                   |                                                                                              | transmembrane protein 161AB-like protein                            |
| Mdem_scaffold_0528        | 333250        | 335490        | K425_1532        |                   |                                                                                              | chitooligosaccharidolytic beta-N-acetylglucosaminidase-like protein |
| Mdem_scaffold_0528        | 342533        | 348030        | K425_1514        |                   |                                                                                              | conserved uncharacterized protein                                   |
| Mdem_scaffold_0528        | 348493        | 350507        | K425_1515        |                   |                                                                                              | ankyrin-repeat domain-containing protein                            |
| Mdem_scaffold_0528        | 350655        | 357027        | K425_1531        |                   |                                                                                              | EB module-containing protein                                        |
| Mdem_scaffold_0528        | 367531        | 368186        | K425_1530        |                   |                                                                                              | hypothetical protein                                                |
| Mdem_scaffold_0528        | 386894        | 393242        | K425_1529        |                   |                                                                                              | headcase-like protein                                               |
| Mdem_scaffold_0528        | 413650        | 413721        | K425_1502        |                   |                                                                                              | tRNA-Asp                                                            |
| Mdem_scaffold_0528        | 478552        | 478626        | K425_1500        |                   |                                                                                              | tRNA-Lys                                                            |
| Mdem_scaffold_0528        | 504799        | 505377        | K425_1528        |                   |                                                                                              | headcase-like protein                                               |
| Mdem_scaffold_0528        | 567181        | 568810        | K425_1527        |                   | similar to egf1.5                                                                            | Trypsin Inhibitor like cysteine rich domain-containing protein      |
| Mdem_scaffold_0528        | 570273        | 571852        | K425_1526        |                   | similar to egf1.5                                                                            | Trypsin Inhibitor like cysteine rich domain-containing protein      |
| Mdem_scaffold_0528        | 586059        | 606389        | K425_1525        |                   |                                                                                              | putative dynein heavy chain, ciliary-like protein                   |
| <b>Mdem_scaffold_0528</b> | <b>629227</b> | <b>630062</b> | <b>K425_1524</b> | <b>17a</b>        | <b>similar to Chelonus inanitus 17a and Cotesia congregata hypothetical protein CBL47422</b> | <b>Bracovirus particle protein 17a</b>                              |
| Mdem_scaffold_0528        | 630639        | 633578        | K425_1523        |                   |                                                                                              | trypsin-like protein                                                |
| Mdem_scaffold_0528        | 634554        | 641460        | K425_1516        |                   |                                                                                              | TAF5-like protein RNA polymerase II p300-like protein               |
| Mdem_scaffold_0528        | 643114        | 653552        | K425_1522        |                   |                                                                                              | elongin A-like protein                                              |
| Mdem_scaffold_0528        | 645455        | 647261        | K425_1517        |                   |                                                                                              | putative reverse transcriptase                                      |
| Mdem_scaffold_0528        | 655277        | 661836        | K425_1518        |                   |                                                                                              | glutamate dehydrogenase-like protein                                |
| Mdem_scaffold_0528        | 664771        | 672626        | K425_1519        |                   |                                                                                              | serpin-like protein                                                 |
| Mdem_scaffold_0528        | 718457        | 729790        | K425_1520        |                   |                                                                                              | hypothetical protein                                                |
| Mdem_scaffold_0528        | 752535        | 759136        | K425_1521        |                   |                                                                                              | conserved uncharacterized protein                                   |
| Mdem_scaffold_0617        | 5302          | 18100         | K425_1543        |                   |                                                                                              | Ribosome 60S biogenesis N-terminal domain-containing protein        |
| Mdem_scaffold_0617        | 17824         | 19681         | K425_1557        |                   |                                                                                              | conserved uncharacterized protein family 11                         |
| Mdem_scaffold_0617        | 23720         | 25289         | K425_1556        |                   |                                                                                              | conserved uncharacterized protein family 11                         |
| Mdem_scaffold_0617        | 34901         | 49515         | K425_1544        |                   |                                                                                              | ankyrin-repeat domain-containing protein                            |
| Mdem_scaffold_0617        | 55976         | 56048         | K425_1542        |                   |                                                                                              | tRNA-Arg                                                            |
| Mdem_scaffold_0617        | 67826         | 68491         | K425_1555        |                   |                                                                                              | ankyrin-repeat domain-containing protein                            |
| Mdem_scaffold_0617        | 126180        | 130371        | K425_1545        |                   |                                                                                              | ankyrin-repeat domain-containing protein                            |
| Mdem_scaffold_0617        | 130426        | 133655        | K425_1554        |                   |                                                                                              | tRNA-(6)A37 thiotransferase enzyme MiaB                             |
| Mdem_scaffold_0617        | 134081        | 138752        | K425_1553        |                   |                                                                                              | apolipoprotein O-like protein                                       |
| Mdem_scaffold_0617        | 141408        | 142269        | K425_1552        |                   |                                                                                              | hypothetical protein                                                |
| Mdem_scaffold_0617        | 142865        | 144213        | K425_1551        |                   |                                                                                              | conserved uncharacterized protein                                   |
| Mdem_scaffold_0617        | 146619        | 158137        | K425_1546        |                   |                                                                                              | importin-5-like protein                                             |
| <b>Mdem_scaffold_0617</b> | <b>161773</b> | <b>163900</b> | <b>K425_1547</b> | <b>odv-e66-12</b> |                                                                                              | <b>putative envelope protein ODV-E66-12</b>                         |
| Mdem_scaffold_0617        | 173325        | 178177        | K425_1550        |                   |                                                                                              | conserved uncharacterized protein                                   |
| Mdem_scaffold_0617        | 212394        | 213548        | K425_1549        |                   |                                                                                              | conserved uncharacterized protein                                   |
| Mdem_scaffold_0617        | 238221        | 240177        | K425_1548        |                   |                                                                                              | conserved uncharacterized protein                                   |
| Mdem_scaffold_0844        | 18342         | 21221         | K425_1593        |                   |                                                                                              | cysteine desulfurase, mitochondrial-like protein                    |
| Mdem_scaffold_0844        | 21502         | 23153         | K425_1611        |                   |                                                                                              | ras-related protein Rab-X6-like protein                             |
| Mdem_scaffold_0844        | 23689         | 25592         | K425_1594        |                   |                                                                                              | hypothetical protein                                                |
| Mdem_scaffold_0844        | 25982         | 28053         | K425_1595        |                   |                                                                                              | ankyrin-repeat domain-containing protein                            |
| Mdem_scaffold_0844        | 28748         | 34819         | K425_1610        |                   |                                                                                              | translation initiation factor eIF-2B subunit delta-like protein     |
| Mdem_scaffold_0844        | 35829         | 37900         | K425_1609        |                   |                                                                                              | ribosomal protein L19-like protein                                  |
| Mdem_scaffold_0844        | 38190         | 47931         | K425_1596        |                   |                                                                                              | peroxisomal acyl-coenzyme A oxidase-like protein                    |
| Mdem_scaffold_0844        | 46699         | 48384         | K425_1608        |                   |                                                                                              | RCC1 domain-containing protein                                      |
| Mdem_scaffold_0844        | 55123         | 70845         | K425_1607        |                   |                                                                                              | syndecan-like protein                                               |
| Mdem_scaffold_0844        | 102577        | 108042        | K425_1606        |                   |                                                                                              | ATPase inhibitor mai-2, mitochondrial-like protein                  |
| Mdem_scaffold_0844        | 106443        | 111178        | K425_1597        |                   |                                                                                              | scarlet-like protein                                                |
| Mdem_scaffold_0844        | 114338        | 115116        | K425_1598        |                   |                                                                                              | hypothetical protein                                                |
| Mdem_scaffold_0844        | 116850        | 117716        | K425_1599        |                   |                                                                                              | hypothetical protein                                                |
| Mdem_scaffold_0844        | 118546        | 126906        | K425_1605        |                   |                                                                                              | Ras-related protein Rab-32-like protein                             |
| <b>Mdem_scaffold_0844</b> | <b>137170</b> | <b>138240</b> | <b>K425_1604</b> | <b>odv-e66-14</b> |                                                                                              | <b>putative envelope protein ODV-E66-14, partial</b>                |
| <b>Mdem_scaffold_0844</b> | <b>138691</b> | <b>139500</b> | <b>K425_1603</b> | <b>odv-e66-15</b> |                                                                                              | <b>putative envelope protein ODV-E66-15, partial</b>                |
| <b>Mdem_scaffold_0844</b> | <b>139688</b> | <b>140497</b> | <b>K425_1602</b> | <b>odv-e66-16</b> |                                                                                              | <b>putative envelope protein ODV-E66-16, partial</b>                |
| Mdem_scaffold_0844        | 143172        | 153804        | K425_1600        |                   |                                                                                              | flapwing-like protein                                               |
| Mdem_scaffold_0844        | 169740        | 181029        | K425_1601        |                   |                                                                                              | conserved uncharacterized protein                                   |
| Mdem_scaffold_0845        | 5788          | 15606         | K425_1613        |                   |                                                                                              | putative alpha-amylase                                              |
| <b>Mdem_scaffold_0845</b> | <b>20016</b>  | <b>21586</b>  | <b>K425_1612</b> | <b>pif-5-4</b>    | <b>synonym odv-e56</b>                                                                       | <b>putative envelope protein ODV-E56-4, partial</b>                 |
| Mdem_scaffold_0845        | 23939         | 25738         | K425_1614        |                   |                                                                                              | putative alpha-amylase                                              |
| Mdem_scaffold_0845        | 32624         | 32956         | K425_1617        |                   |                                                                                              | conserved uncharacterized protein                                   |
| Mdem_scaffold_0845        | 74838         | 77274         | K425_1616        |                   |                                                                                              | conserved uncharacterized protein                                   |
| Mdem_scaffold_0845        | 183748        | 186103        | K425_1615        |                   |                                                                                              | ankyrin-repeat domain-containing protein                            |
| <b>Mdem_scaffold_0919</b> | <b>1268</b>   | <b>2626</b>   | <b>K425_1685</b> | <b>odv-e66-17</b> |                                                                                              | <b>putative envelope protein ODV-E66-17</b>                         |
| <b>Mdem_scaffold_0919</b> | <b>3526</b>   | <b>5355</b>   | <b>K425_1684</b> | <b>odv-e66-18</b> |                                                                                              | <b>putative envelope protein ODV-E66-18</b>                         |
| <b>Mdem_scaffold_0919</b> | <b>8120</b>   | <b>9577</b>   | <b>K425_1686</b> | <b>odv-e66-19</b> |                                                                                              | <b>putative envelope protein ODV-E66-19</b>                         |
| <b>Mdem_scaffold_0919</b> | <b>12921</b>  | <b>13640</b>  | <b>K425_1688</b> | <b>odv-e66-20</b> |                                                                                              | <b>putative envelope protein ODV-E66-20, partial</b>                |
| <b>Mdem_scaffold_0919</b> | <b>13977</b>  | <b>15165</b>  | <b>K425_1687</b> | <b>odv-e66-21</b> |                                                                                              | <b>putative envelope protein ODV-E66-21</b>                         |
| Mdem_scaffold_0919        | 17045         | 20709         | K425_1618        |                   |                                                                                              | cytochrome b-561 domain containing protein                          |
| Mdem_scaffold_0919        | 31566         | 39431         | K425_1619        |                   |                                                                                              | t-complex protein 11 domain-containing protein                      |
| Mdem_scaffold_0919        | 36287         | 39993         | K425_1683        |                   |                                                                                              | regulator of telomere elongation helicase-like protein              |
| Mdem_scaffold_0919        | 46260         | 49799         | K425_1620        |                   |                                                                                              | hypothetical protein                                                |
| Mdem_scaffold_0919        | 50876         | 55896         | K425_1621        |                   |                                                                                              | hypothetical protein                                                |
| Mdem_scaffold_0919        | 71118         | 72317         | K425_1622        |                   |                                                                                              | carboxylesterase domain-containing protein                          |
| Mdem_scaffold_0919        | 121582        | 122205        | K425_1623        |                   |                                                                                              | carboxylesterase domain-containing protein                          |
| Mdem_scaffold_0919        | 129692        | 130859        | K425_1682        |                   |                                                                                              | lipocalin-like protein                                              |
| Mdem_scaffold_0919        | 158500        | 161599        | K425_1624        |                   |                                                                                              | retinol dehydrogenase-like protein                                  |
| Mdem_scaffold_0919        | 165776        | 168080        | K425_1625        |                   |                                                                                              | venom allergen 5-like protein                                       |
| Mdem_scaffold_0919        | 169595        | 172720        | K425_1626        |                   |                                                                                              | venom allergen 5-like protein                                       |
| Mdem_scaffold_0919        | 173720        | 181001        | K425_1681        |                   |                                                                                              | calcium-binding mitochondrial carrier protein Aralar1-like protein  |
| Mdem_scaffold_0919        | 207147        | 213143        | K425_1627        |                   |                                                                                              | serine protease stubble-like protein                                |

|                    |        |        |           |        |                                                                |                                                                      |
|--------------------|--------|--------|-----------|--------|----------------------------------------------------------------|----------------------------------------------------------------------|
| Mdem_scaffold_0919 | 213255 | 226701 | K425_1680 |        |                                                                | serpin-like protein                                                  |
| Mdem_scaffold_0919 | 227006 | 235014 | K425_1628 |        |                                                                | ubiquitin protein ligase E3A-like protein                            |
| Mdem_scaffold_0919 | 235735 | 237628 | K425_1679 |        |                                                                | crimped-like protein                                                 |
| Mdem_scaffold_0919 | 238192 | 242793 | K425_1678 |        |                                                                | NADH-cytochrome b5 reductase 2-like protein                          |
| Mdem_scaffold_0919 | 244593 | 253076 | K425_1629 |        |                                                                | NADH-cytochrome b5 reductase 2-like protein                          |
| Mdem_scaffold_0919 | 253067 | 258669 | K425_1677 |        |                                                                | T-complex protein 1, beta subunit                                    |
| Mdem_scaffold_0919 | 263432 | 270538 | K425_1630 |        |                                                                | inscuteable-like protein                                             |
| Mdem_scaffold_0919 | 272017 | 274494 | K425_1631 |        |                                                                | Bromodomain-containing protein                                       |
| Mdem_scaffold_0919 | 274582 | 279021 | K425_1676 |        |                                                                | hypothetical protein                                                 |
| Mdem_scaffold_0919 | 285449 | 289504 | K425_1675 |        |                                                                | hypothetical protein                                                 |
| Mdem_scaffold_0919 | 290833 | 295870 | K425_1632 |        |                                                                | ADP-ribosylation factor GTPase-activating protein 2-like protein     |
| Mdem_scaffold_0919 | 297988 | 302936 | K425_1674 |        |                                                                | conserved uncharacterized protein                                    |
| Mdem_scaffold_0919 | 305186 | 322962 | K425_1633 |        |                                                                | disintegrin and metalloproteinase-like protein                       |
| Mdem_scaffold_0919 | 327956 | 330653 | K425_1673 |        |                                                                | hypothetical protein                                                 |
| Mdem_scaffold_0919 | 332074 | 340418 | K425_1634 |        |                                                                | Kv channel-interacting protein 2-like protein                        |
| Mdem_scaffold_0919 | 342622 | 344663 | K425_1672 |        |                                                                | alpha-tubulin-like protein                                           |
| Mdem_scaffold_0919 | 345232 | 347994 | K425_1635 | 35a-8  | Similar to Chelonus inanitus 35a                               | conserved uncharacterized protein 35a-like protein-8                 |
| Mdem_scaffold_0919 | 348137 | 350413 | K425_1636 | 35a-9  | Similar to Chelonus inanitus 35a                               | conserved uncharacterized protein 35a-like protein-9                 |
| Mdem_scaffold_0919 | 351060 | 352745 | K425_1637 | 35a-10 | Similar to Chelonus inanitus 35a                               | conserved uncharacterized protein 35a-like protein-10                |
| Mdem_scaffold_0919 | 353152 | 354288 | K425_1638 | 35a-11 | Similar to Chelonus inanitus 35a                               | conserved uncharacterized protein 35a-like protein-11                |
| Mdem_scaffold_0919 | 354662 | 355501 | K425_1639 | 35a-12 | Similar to Chelonus inanitus 35a                               | conserved uncharacterized protein 35a-like protein-12                |
| Mdem_scaffold_0919 | 355743 | 360623 | K425_1640 | 35a-13 | Similar to Chelonus inanitus 35a                               | conserved uncharacterized protein 35a-like protein-13                |
| Mdem_scaffold_0919 | 360960 | 363266 | K425_1641 | 35a-14 | Similar to Chelonus inanitus 35a                               | conserved uncharacterized protein 35a-like protein-14                |
| Mdem_scaffold_0919 | 368150 | 369771 | K425_1671 |        |                                                                | 7tm Odorant receptor domain-containing protein                       |
| Mdem_scaffold_0919 | 371718 | 377989 | K425_1642 |        |                                                                | conserved uncharacterized protein                                    |
| Mdem_scaffold_0919 | 383050 | 387089 | K425_1643 |        |                                                                | conserved uncharacterized protein family 3                           |
| Mdem_scaffold_0919 | 390490 | 394354 | K425_1670 |        |                                                                | king tubby-like protein                                              |
| Mdem_scaffold_0919 | 395906 | 400102 | K425_1669 |        |                                                                | fructose-bisphosphate aldolase-like protein                          |
| Mdem_scaffold_0919 | 404121 | 404903 | K425_1668 |        |                                                                | fructose-bisphosphate aldolase-like protein                          |
| Mdem_scaffold_0919 | 405774 | 419350 | K425_1644 |        |                                                                | ADP-ribosylation factor-like protein                                 |
| Mdem_scaffold_0919 | 419639 | 425953 | K425_1667 |        |                                                                | DNA-polymerase-delta                                                 |
| Mdem_scaffold_0919 | 426048 | 427639 | K425_1666 |        |                                                                | conserved uncharacterized protein                                    |
| Mdem_scaffold_0919 | 428541 | 432991 | K425_1665 |        |                                                                | calumenin-like protein                                               |
| Mdem_scaffold_0919 | 435714 | 439330 | K425_1645 |        |                                                                | tetraspanin-like protein                                             |
| Mdem_scaffold_0919 | 440326 | 450047 | K425_1664 |        |                                                                | conserved uncharacterized protein                                    |
| Mdem_scaffold_0919 | 464988 | 467975 | K425_1646 |        |                                                                | alkylated DNA repair protein alkB 8-like protein                     |
| Mdem_scaffold_0919 | 469106 | 476426 | K425_1663 |        |                                                                | conserved uncharacterized protein                                    |
| Mdem_scaffold_0919 | 511818 | 515872 | K425_1647 |        |                                                                | dopamine receptor-like protein                                       |
| Mdem_scaffold_0919 | 520630 | 524719 | K425_1648 |        |                                                                | PBP/GOBP family protein                                              |
| Mdem_scaffold_0919 | 526352 | 527961 | K425_1650 |        |                                                                | serine protease gastrulation-defective-like protein                  |
| Mdem_scaffold_0919 | 529175 | 530893 | K425_1649 |        |                                                                | conserved uncharacterized protein                                    |
| Mdem_scaffold_0919 | 535035 | 542037 | K425_1662 |        |                                                                | PAX-interacting-like protein                                         |
| Mdem_scaffold_0919 | 547059 | 570127 | K425_1661 |        |                                                                | CNG channel-like protein                                             |
| Mdem_scaffold_0919 | 618516 | 620705 | K425_1651 | p74    | synonym pif-0                                                  | per os infectivity factor, viral envelope protein p74                |
| Mdem_scaffold_0919 | 627737 | 632223 | K425_1652 |        |                                                                | hypothetical protein                                                 |
| Mdem_scaffold_0919 | 628851 | 630191 | K425_1660 |        |                                                                | BTB/POZ domain containing protein                                    |
| Mdem_scaffold_0919 | 632755 | 634994 | K425_1653 |        | similar to Cotesia congregata Cc8L18.1 from p74 genomic region | conserved uncharacterized protein family 8                           |
| Mdem_scaffold_0919 | 635259 | 637223 | K425_1654 |        | similar to Cotesia congregata Cc8L18.1 from p74 genomic region | conserved uncharacterized protein family 8                           |
| Mdem_scaffold_0919 | 639264 | 642664 | K425_1655 |        |                                                                | figetin-like protein                                                 |
| Mdem_scaffold_0919 | 642908 | 646166 | K425_1656 |        |                                                                | chymotrypsin-2                                                       |
| Mdem_scaffold_0919 | 646020 | 647682 | K425_1657 |        |                                                                | ankyrin-repeat domain-containing protein                             |
| Mdem_scaffold_0919 | 648230 | 652565 | K425_1659 |        |                                                                | putative Ufm1-specific protease 2-like protein                       |
| Mdem_scaffold_0919 | 653279 | 659975 | K425_1658 |        |                                                                | Spt20-like protein                                                   |
| Mdem_scaffold_0938 | 23773  | 23847  | K425_1689 |        |                                                                | tRNA-Met                                                             |
| Mdem_scaffold_0938 | 25856  | 28208  | K425_1691 |        |                                                                | RWD domain-containing protein                                        |
| Mdem_scaffold_0938 | 31460  | 42857  | K425_1744 |        |                                                                | NADP-dependent malic enzyme-like protein                             |
| Mdem_scaffold_0938 | 54075  | 55507  | K425_1692 |        |                                                                | Phosphatidylinositol-specific phospholipase C, X domain-like protein |
| Mdem_scaffold_0938 | 59068  | 61958  | K425_1693 |        |                                                                | Phosphatidylinositol N-acetylglucosaminyltransferase subunit C       |
| Mdem_scaffold_0938 | 60963  | 62419  | K425_1743 |        |                                                                | globin domain-containing protein                                     |
| Mdem_scaffold_0938 | 65648  | 68434  | K425_1694 |        |                                                                | conserved uncharacterized protein                                    |
| Mdem_scaffold_0938 | 70663  | 72441  | K425_1742 |        |                                                                | 7tm Odorant receptor domain-containing protein                       |
| Mdem_scaffold_0938 | 75769  | 82049  | K425_1741 |        |                                                                | eukaryotic translation initiation factor 2-alpha kinase-like protein |
| Mdem_scaffold_0938 | 86598  | 94355  | K425_1740 |        |                                                                | bric-a-brac-like protein                                             |
| Mdem_scaffold_0938 | 87685  | 88584  | K425_1695 |        |                                                                | eukaryotic translation initiation factor 2-alpha kinase-like protein |
| Mdem_scaffold_0938 | 96880  | 98614  | K425_1696 |        |                                                                | globin domain-containing protein                                     |
| Mdem_scaffold_0938 | 103415 | 112806 | K425_1697 |        |                                                                | flare-like protein                                                   |
| Mdem_scaffold_0938 | 119114 | 124468 | K425_1698 |        |                                                                | slit-like protein                                                    |
| Mdem_scaffold_0938 | 126646 | 133846 | K425_1739 |        |                                                                | rhythmically expressed 5-like protein                                |
| Mdem_scaffold_0938 | 151871 | 155150 | K425_1738 |        |                                                                | eukaryotic initiation factor 4E-like protein                         |
| Mdem_scaffold_0938 | 156800 | 159589 | K425_1699 |        |                                                                | Bromodomain-containing protein                                       |
| Mdem_scaffold_0938 | 165889 | 178078 | K425_1737 |        |                                                                | ebony-like protein                                                   |
| Mdem_scaffold_0938 | 196731 | 204637 | K425_1745 |        |                                                                | conserved uncharacterized protein                                    |
| Mdem_scaffold_0938 | 224428 | 224949 | K425_1700 |        |                                                                | Thyrotropin-releasing hormone receptor-like protein                  |
| Mdem_scaffold_0938 | 245302 | 245994 | K425_1701 |        |                                                                | Thyrotropin-releasing hormone receptor                               |
| Mdem_scaffold_0938 | 254487 | 260138 | K425_1736 |        |                                                                | protein FAM45-like protein                                           |
| Mdem_scaffold_0938 | 261120 | 267691 | K425_1702 |        |                                                                | eukaryotic initiation factor A-like protein                          |
| Mdem_scaffold_0938 | 268705 | 273752 | K425_1703 |        |                                                                | neprilysin-like protein                                              |
| Mdem_scaffold_0938 | 274663 | 281257 | K425_1735 |        |                                                                | Phosphatidylinositol 4-kinase-like protein                           |
| Mdem_scaffold_0938 | 341219 | 341311 | K425_1690 |        |                                                                | tRNA-Ile                                                             |
| Mdem_scaffold_0938 | 464703 | 467188 | K425_1734 |        |                                                                | conserved uncharacterized protein                                    |
| Mdem_scaffold_0938 | 531396 | 535582 | K425_1704 |        |                                                                | U2 small nuclear riboprotein auxiliary factor 50-like protein        |

|                           |               |               |                  |                            |                                        |                                                                                                   |
|---------------------------|---------------|---------------|------------------|----------------------------|----------------------------------------|---------------------------------------------------------------------------------------------------|
| Mdem_scaffold_0938        | 583034        | 590357        | K425_1705        |                            |                                        | conserved uncharacterized protein                                                                 |
| Mdem_scaffold_0938        | 615568        | 617220        | K425_1706        |                            |                                        | Ecdysteroid kinase domain-containing protein                                                      |
| Mdem_scaffold_0938        | 617437        | 620524        | K425_1707        |                            |                                        | Ecdysteroid kinase domain-containing protein                                                      |
| Mdem_scaffold_0938        | 662538        | 673030        | K425_1708        |                            |                                        | Zona pellucida-like domain-containing protein                                                     |
| Mdem_scaffold_0938        | 681217        | 696257        | K425_1733        |                            |                                        | Zona pellucida-like domain-containing protein                                                     |
| Mdem_scaffold_0938        | 699086        | 700646        | K425_1732        |                            |                                        | NPC2-like protein                                                                                 |
| Mdem_scaffold_0938        | 705962        | 717333        | K425_1731        |                            |                                        | WD repeat-containing protein                                                                      |
| Mdem_scaffold_0938        | 718244        | 735163        | K425_1709        |                            |                                        | Fmr1-like protein                                                                                 |
| Mdem_scaffold_0938        | 740470        | 741188        | K425_1710        |                            |                                        | hypothetical protein                                                                              |
| <b>Mdem_scaffold_0938</b> | <b>741776</b> | <b>744812</b> | <b>K425_1711</b> | <b>p47</b>                 |                                        | <b>viral RNA polymerase subunit p47</b>                                                           |
| Mdem_scaffold_0938        | 745432        | 748402        | K425_1712        |                            |                                        | conserved uncharacterized protein family 12                                                       |
| Mdem_scaffold_0938        | 756290        | 757471        | K425_1713        |                            |                                        | conserved uncharacterized protein family 12                                                       |
| Mdem_scaffold_0938        | 759188        | 760680        | K425_1714        |                            |                                        | conserved uncharacterized protein family 12                                                       |
| Mdem_scaffold_0938        | 761747        | 764805        | K425_1715        |                            |                                        | transmembrane protein 208-like protein                                                            |
| Mdem_scaffold_0938        | 765928        | 774209        | K425_1717        |                            |                                        | nose resistant to fluoxetine protein 6-like protein                                               |
| Mdem_scaffold_0938        | 775322        | 779787        | K425_1716        |                            | similar to GFP_L6_0170                 | dehydrogenase E1 and transketolase domain-containing protein                                      |
| Mdem_scaffold_0938        | 779801        | 784147        | K425_1730        |                            |                                        | disintegrin and metalloproteinase-like protein                                                    |
| Mdem_scaffold_0938        | 784670        | 786238        | K425_1718        |                            | similar to GIP_L3_0210 and GFP_L6_0160 | chymotrypsin-like protein                                                                         |
| Mdem_scaffold_0938        | 821383        | 825001        | K425_1719        |                            |                                        | MFS sugar transporter domain-containing protein                                                   |
| Mdem_scaffold_0938        | 833499        | 835358        | K425_1720        |                            |                                        | 7tm Odorant receptor domain-containing protein                                                    |
| Mdem_scaffold_0938        | 836537        | 838600        | K425_1721        |                            |                                        | hypothetical protein                                                                              |
| Mdem_scaffold_0938        | 838390        | 840750        | K425_1729        |                            |                                        | globin domain-containing protein                                                                  |
| Mdem_scaffold_0938        | 858329        | 865235        | K425_1728        |                            | similar to GFP_L6_0020 and GIP_L3_0040 | phospholipase B-like protein                                                                      |
| Mdem_scaffold_0938        | 882613        | 890513        | K425_1722        |                            |                                        | methionine adenosyltransferase                                                                    |
| Mdem_scaffold_0938        | 890924        | 907615        | K425_1727        |                            |                                        | Zinc-finger C2H2 domain and EB module-containing protein                                          |
| Mdem_scaffold_0938        | 910549        | 915184        | K425_1723        |                            |                                        | conserved uncharacterized protein                                                                 |
| Mdem_scaffold_0938        | 916012        | 924067        | K425_1726        |                            |                                        | ubiquitin-protein ligase HERC4-like protein                                                       |
| Mdem_scaffold_0938        | 925354        | 932934        | K425_1724        |                            |                                        | PHD finger-like protein                                                                           |
| Mdem_scaffold_0938        | 932069        | 934020        | K425_1725        |                            |                                        | methionyl-tRNA formyltransferase                                                                  |
| Mdem_scaffold_1154        | 30            | 1946          | K425_6           |                            |                                        | putative ataxin-3 protein                                                                         |
| Mdem_scaffold_1154        | 3188          | 8654          | K425_7           |                            |                                        | negative elongation factor E                                                                      |
| Mdem_scaffold_1154        | 3222          | 11147         | K425_139         |                            |                                        | conserved uncharacterized protein                                                                 |
| Mdem_scaffold_1154        | 13001         | 18696         | K425_138         |                            |                                        | protein SCAI-like protein                                                                         |
| Mdem_scaffold_1154        | 47307         | 48445         | K425_8           |                            |                                        | DNA-binding protein D-ETS-3-like protein                                                          |
| Mdem_scaffold_1154        | 53659         | 56126         | K425_136         |                            |                                        | N-acetylgalactosamine kinase-like protein                                                         |
| Mdem_scaffold_1154        | 56941         | 65177         | K425_137         |                            |                                        | ankyrin-repeat domain-containing protein                                                          |
| Mdem_scaffold_1154        | 99503         | 115321        | K425_135         |                            |                                        | conserved uncharacterized protein                                                                 |
| Mdem_scaffold_1154        | 135817        | 159205        | K425_9           |                            |                                        | homeobox protein caupolican-like protein                                                          |
| Mdem_scaffold_1154        | 187709        | 200663        | K425_10          |                            |                                        | homeobox protein caupolican-like protein                                                          |
| Mdem_scaffold_1154        | 237873        | 241259        | K425_134         |                            |                                        | neprilysin-like protein                                                                           |
| Mdem_scaffold_1154        | 290456        | 292191        | K425_133         |                            |                                        | conserved uncharacterized protein                                                                 |
| Mdem_scaffold_1154        | 293552        | 298197        | K425_11          |                            |                                        | fatty acid-binding protein                                                                        |
| <b>Mdem_scaffold_1154</b> | <b>298813</b> | <b>299357</b> | <b>K425_12</b>   | <b>similar to vlf-1b-1</b> |                                        | <b>conserved hypothetical protein</b>                                                             |
| Mdem_scaffold_1154        | 309615        | 317415        | K425_13          |                            |                                        | serine protease-like protein                                                                      |
| Mdem_scaffold_1154        | 317669        | 320305        | K425_132         |                            |                                        | splicing factor 3A subunit 3-like protein                                                         |
| Mdem_scaffold_1154        | 319883        | 322672        | K425_14          |                            |                                        | origin recognition complex subunit 1-like protein                                                 |
| <b>Mdem_scaffold_1154</b> | <b>323090</b> | <b>325417</b> | <b>K425_131</b>  | <b>odv-e66-3</b>           |                                        | <b>putative envelope protein ODV-E66-3</b>                                                        |
| Mdem_scaffold_1154        | 402622        | 428524        | K425_15          |                            |                                        | transcription factor AP-2-like protein                                                            |
| Mdem_scaffold_1154        | 432612        | 434622        | K425_130         |                            |                                        | ubiquitin carboxy-terminal hydrolase-like protein                                                 |
| Mdem_scaffold_1154        | 436290        | 440483        | K425_129         |                            |                                        | conserved uncharacterized protein                                                                 |
| Mdem_scaffold_1154        | 474298        | 474851        | K425_128         |                            |                                        | conserved uncharacterized protein                                                                 |
| Mdem_scaffold_1154        | 482240        | 487353        | K425_16          |                            |                                        | guanylate kinase domain-containing protein                                                        |
| Mdem_scaffold_1154        | 490626        | 495034        | K425_17          |                            |                                        | ankyrin-repeat domain-containing protein                                                          |
| Mdem_scaffold_1154        | 494301        | 497561        | K425_127         |                            |                                        | dnaj domain-containing protein                                                                    |
| Mdem_scaffold_1154        | 498545        | 500495        | K425_18          |                            |                                        | u2 small nuclear ribonucleoprotein auxiliary factor 35 kDa subunit-related protein 1-like protein |
| Mdem_scaffold_1154        | 501359        | 503811        | K425_126         |                            |                                        | alpha-tocopherol transfer-like protein                                                            |
| Mdem_scaffold_1154        | 511539        | 517661        | K425_125         |                            |                                        | SAPS domain-containing protein                                                                    |
| Mdem_scaffold_1154        | 518318        | 521355        | K425_19          |                            |                                        | bicoid stability factor-like protein                                                              |
| Mdem_scaffold_1154        | 521919        | 526898        | K425_20          |                            |                                        | bicoid stability factor-like protein                                                              |
| Mdem_scaffold_1154        | 526869        | 527783        | K425_124         |                            |                                        | barrier-to-autointegration factor A-like protein                                                  |
| Mdem_scaffold_1154        | 527784        | 529454        | K425_21          |                            |                                        | NEFA-interacting nuclear protein NIP30-like protein                                               |
| Mdem_scaffold_1154        | 529350        | 532490        | K425_123         |                            |                                        | Sly1-like protein                                                                                 |
| Mdem_scaffold_1154        | 534020        | 539101        | K425_122         |                            |                                        | conserved uncharacterized protein                                                                 |
| Mdem_scaffold_1154        | 547299        | 549660        | K425_22          |                            |                                        | d-2-hydroxyglutarate dehydrogenase, mitochondrial-like protein                                    |
| Mdem_scaffold_1154        | 551457        | 553154        | K425_23          |                            |                                        | conserved uncharacterized protein                                                                 |
| Mdem_scaffold_1154        | 563592        | 567265        | K425_24          |                            |                                        | conserved uncharacterized protein                                                                 |
| Mdem_scaffold_1154        | 573194        | 577043        | K425_121         |                            |                                        | cdc42-like protein                                                                                |
| Mdem_scaffold_1154        | 577136        | 578307        | K425_25          |                            |                                        | proteasome subunit beta type-1-like protein                                                       |
| Mdem_scaffold_1154        | 578493        | 579969        | K425_120         |                            |                                        | ribosomal protein S7                                                                              |
| Mdem_scaffold_1154        | 580267        | 581857        | K425_26          |                            |                                        | cytochrome c oxidase subunit IV-like protein                                                      |
| Mdem_scaffold_1154        | 584681        | 588788        | K425_119         |                            |                                        | PAP-associated domain-containing protein                                                          |
| Mdem_scaffold_1154        | 589257        | 590560        | K425_28          |                            |                                        | cytochrome c oxidase subunit Vb-like protein                                                      |
| Mdem_scaffold_1154        | 590561        | 592971        | K425_118         |                            |                                        | peroxin 13-like protein                                                                           |
| Mdem_scaffold_1154        | 593849        | 595006        | K425_27          |                            |                                        | PKC-activated protein phosphatase-1 inhibitor-like protein                                        |
| Mdem_scaffold_1154        | 594302        | 600778        | K425_117         |                            |                                        | SART-1 domain-containing protein                                                                  |
| Mdem_scaffold_1154        | 604480        | 610285        | K425_116         |                            |                                        | decapentaplegic-like protein                                                                      |
| Mdem_scaffold_1154        | 615887        | 619264        | K425_115         |                            |                                        | AMP-binding domain-containing protein                                                             |
| Mdem_scaffold_1154        | 619616        | 620461        | K425_29          |                            |                                        | Splicing factor 3B subunit 10 (SF3b10)-like protein                                               |
| Mdem_scaffold_1154        | 620452        | 621955        | K425_114         |                            |                                        | exosome complex component MTR3-like protein                                                       |
| Mdem_scaffold_1154        | 621956        | 625246        | K425_31          |                            |                                        | glucose dehydrogenase acceptor-like protein                                                       |

|                    |         |         |          |  |                                                                                            |
|--------------------|---------|---------|----------|--|--------------------------------------------------------------------------------------------|
| Mdem_scaffold_1154 | 624252  | 625710  | K425_113 |  | RNA recognition motif domain-containing protein                                            |
| Mdem_scaffold_1154 | 626003  | 629593  | K425_30  |  | grapes-like protein                                                                        |
| Mdem_scaffold_1154 | 629975  | 631852  | K425_112 |  | nuclear inhibitor of protein phosphatase 1-like protein                                    |
| Mdem_scaffold_1154 | 631930  | 636579  | K425_32  |  | Blastoderm-specific 25D-like protein                                                       |
| Mdem_scaffold_1154 | 637451  | 639273  | K425_111 |  | endothelial differentiation-related factor 1-like protein                                  |
| Mdem_scaffold_1154 | 640278  | 643166  | K425_110 |  | conserved uncharacterized protein                                                          |
| Mdem_scaffold_1154 | 643707  | 645952  | K425_109 |  | conserved uncharacterized protein                                                          |
| Mdem_scaffold_1154 | 650250  | 652692  | K425_33  |  | proton-coupled amino acid transporter 4-like protein                                       |
| Mdem_scaffold_1154 | 656204  | 660185  | K425_34  |  | proton-coupled amino acid transporter 4-like protein                                       |
| Mdem_scaffold_1154 | 660198  | 661383  | K425_108 |  | RNA polymerase II subunit 10                                                               |
| Mdem_scaffold_1154 | 661180  | 665447  | K425_35  |  | PAB-dependent poly(A)-specific ribonuclease subunit-like protein                           |
| Mdem_scaffold_1154 | 669207  | 672178  | K425_36  |  | conserved uncharacterized protein                                                          |
| Mdem_scaffold_1154 | 673930  | 675521  | K425_107 |  | conserved uncharacterized protein                                                          |
| Mdem_scaffold_1154 | 676062  | 677861  | K425_37  |  | conserved uncharacterized protein                                                          |
| Mdem_scaffold_1154 | 678272  | 681725  | K425_38  |  | flotillin-1-like protein                                                                   |
| Mdem_scaffold_1154 | 679665  | 683455  | K425_106 |  | conserved uncharacterized protein                                                          |
| Mdem_scaffold_1154 | 683020  | 687134  | K425_39  |  | hypothetical protein                                                                       |
| Mdem_scaffold_1154 | 687999  | 695309  | K425_40  |  | nervous wreck-like protein                                                                 |
| Mdem_scaffold_1154 | 696325  | 698315  | K425_105 |  | 3-hydroxyacyl-CoA dehydrogenase type-2-like protein                                        |
| Mdem_scaffold_1154 | 698621  | 706177  | K425_41  |  | cytochrome P450 domain-containing protein                                                  |
| Mdem_scaffold_1154 | 706666  | 711259  | K425_104 |  | phospholipase D3-like protein                                                              |
| Mdem_scaffold_1154 | 890122  | 899887  | K425_42  |  | conserved uncharacterized protein                                                          |
| Mdem_scaffold_1154 | 905247  | 914193  | K425_103 |  | Rab-GTPase-TBC domain-containing protein                                                   |
| Mdem_scaffold_1154 | 932349  | 935981  | K425_102 |  | kinesin-like protein KIF18A                                                                |
| Mdem_scaffold_1154 | 938122  | 939676  | K425_43  |  | hypothetical protein                                                                       |
| Mdem_scaffold_1154 | 940038  | 942121  | K425_44  |  | hypothetical protein                                                                       |
| Mdem_scaffold_1154 | 942122  | 942837  | K425_101 |  | hypothetical protein                                                                       |
| Mdem_scaffold_1154 | 943316  | 947057  | K425_45  |  | xenotropic and polytropic retrovirus receptor 1-like protein                               |
| Mdem_scaffold_1154 | 949154  | 963761  | K425_100 |  | ion channel regulatory protein UNC-93 domain-containing protein                            |
| Mdem_scaffold_1154 | 978997  | 983885  | K425_46  |  | DNA mismatch repair protein mutL-like protein                                              |
| Mdem_scaffold_1154 | 983560  | 985987  | K425_99  |  | negative elongation factor D-like protein                                                  |
| Mdem_scaffold_1154 | 987780  | 994054  | K425_47  |  | carnitine O-palmitoyltransferase 1-like protein                                            |
| Mdem_scaffold_1154 | 993937  | 995583  | K425_98  |  | conserved uncharacterized protein                                                          |
| Mdem_scaffold_1154 | 996546  | 999378  | K425_48  |  | T-complex protein 1, delta subunit                                                         |
| Mdem_scaffold_1154 | 999801  | 1003053 | K425_97  |  | N-acetylgalactosaminyltransferase 7-like protein                                           |
| Mdem_scaffold_1154 | 1002377 | 1006202 | K425_49  |  | THAP domain-containing protein                                                             |
| Mdem_scaffold_1154 | 1007260 | 1008337 | K425_50  |  | 7tm Odorant receptor domain-containing protein                                             |
| Mdem_scaffold_1154 | 1010278 | 1011246 | K425_51  |  | 7tm Odorant receptor domain-containing protein                                             |
| Mdem_scaffold_1154 | 1013265 | 1018587 | K425_52  |  | 7tm Odorant receptor domain-containing protein                                             |
| Mdem_scaffold_1154 | 1021184 | 1025824 | K425_53  |  | 7tm Odorant receptor domain-containing protein                                             |
| Mdem_scaffold_1154 | 1026722 | 1028877 | K425_54  |  | 7tm Odorant receptor domain-containing protein                                             |
| Mdem_scaffold_1154 | 1030363 | 1030713 | K425_55  |  | 7tm Odorant receptor domain-containing protein                                             |
| Mdem_scaffold_1154 | 1031689 | 1032368 | K425_56  |  | 7tm Odorant receptor domain-containing protein                                             |
| Mdem_scaffold_1154 | 1034274 | 1036078 | K425_57  |  | 7tm Odorant receptor domain-containing protein                                             |
| Mdem_scaffold_1154 | 1036572 | 1043333 | K425_58  |  | 7tm Odorant receptor domain-containing protein                                             |
| Mdem_scaffold_1154 | 1044763 | 1048943 | K425_59  |  | 7tm Odorant receptor domain-containing protein                                             |
| Mdem_scaffold_1154 | 1049711 | 1051532 | K425_60  |  | conserved uncharacterized protein                                                          |
| Mdem_scaffold_1154 | 1053282 | 1058756 | K425_61  |  | 7tm Odorant receptor domain-containing protein                                             |
| Mdem_scaffold_1154 | 1059795 | 1061580 | K425_96  |  | Pacifastin inhibitor (LCMII) domain-containing protein                                     |
| Mdem_scaffold_1154 | 1063344 | 1066684 | K425_62  |  | Citrate transporter domain-containing protein                                              |
| Mdem_scaffold_1154 | 1092739 | 1102542 | K425_63  |  | scavenger receptor class B member-like protein                                             |
| Mdem_scaffold_1154 | 1104725 | 1107163 | K425_64  |  | Low-density lipoprotein receptor-like protein                                              |
| Mdem_scaffold_1154 | 1109076 | 1116548 | K425_95  |  | striatin-like protein                                                                      |
| Mdem_scaffold_1154 | 1120115 | 1125222 | K425_65  |  | epithelial splicing regulatory-like protein                                                |
| Mdem_scaffold_1154 | 1126886 | 1132735 | K425_66  |  | peroxidasin-like protein                                                                   |
| Mdem_scaffold_1154 | 1132945 | 1134587 | K425_94  |  | acyl-coenzyme A thioesterase-like protein                                                  |
| Mdem_scaffold_1154 | 1134648 | 1139146 | K425_93  |  | diphosphomevalonate decarboxylase                                                          |
| Mdem_scaffold_1154 | 1136672 | 1139158 | K425_67  |  | actin domain-containing protein                                                            |
| Mdem_scaffold_1154 | 1140864 | 1144363 | K425_68  |  | cleavage and polyadenylation specificity factor subunit 5-like protein                     |
| Mdem_scaffold_1154 | 1144878 | 1148871 | K425_69  |  | conserved uncharacterized protein                                                          |
| Mdem_scaffold_1154 | 1149038 | 1151650 | K425_92  |  | phytanoyl-CoA dioxygenase domain-containing protein                                        |
| Mdem_scaffold_1154 | 1152969 | 1158076 | K425_70  |  | conserved uncharacterized protein                                                          |
| Mdem_scaffold_1154 | 1215576 | 1217483 | K425_91  |  | ubiquitin-related modifier 1-like protein                                                  |
| Mdem_scaffold_1154 | 1220443 | 1225189 | K425_90  |  | lung seven transmembrane receptor domain-containing protein                                |
| Mdem_scaffold_1154 | 1225262 | 1227505 | K425_89  |  | syntaxin-17-like protein                                                                   |
| Mdem_scaffold_1154 | 1234500 | 1236992 | K425_88  |  | putative dehydrogenase and reductase                                                       |
| Mdem_scaffold_1154 | 1249926 | 1251494 | K425_87  |  | hypothetical protein                                                                       |
| Mdem_scaffold_1154 | 1262890 | 1265961 | K425_86  |  | Insect allergen related repeat, nitrile-specifier detoxification domain-containing protein |
| Mdem_scaffold_1154 | 1293091 | 1300165 | K425_85  |  | Zinc finger, C2H2 type domain-containing protein                                           |
| Mdem_scaffold_1154 | 1457877 | 1464966 | K425_84  |  | shroom-like protein                                                                        |
| Mdem_scaffold_1154 | 1484663 | 1489616 | K425_83  |  | hypothetical protein                                                                       |
| Mdem_scaffold_1154 | 1546657 | 1549459 | K425_71  |  | putative nucleolar GTP-binding protein                                                     |
| Mdem_scaffold_1154 | 1553273 | 1557301 | K425_72  |  | coronin-like protein                                                                       |
| Mdem_scaffold_1154 | 1562091 | 1564595 | K425_73  |  | lipopolysaccharide-induced tumor necrosis factor-alpha factor-like protein                 |
| Mdem_scaffold_1154 | 1565549 | 1567586 | K425_75  |  | lipopolysaccharide-induced tumor necrosis factor-alpha factor-like protein                 |
| Mdem_scaffold_1154 | 1566352 | 1569447 | K425_74  |  | lipopolysaccharide-induced tumor necrosis factor-alpha factor-like protein                 |
| Mdem_scaffold_1154 | 1570228 | 1573552 | K425_76  |  | Histidyl-tRNA synthetase, cytoplasmic                                                      |
| Mdem_scaffold_1154 | 1572103 | 1582185 | K425_82  |  | Histidyl-tRNA synthetase, cytoplasmic                                                      |
| Mdem_scaffold_1154 | 1586069 | 1590536 | K425_81  |  | hypothetical protein                                                                       |

|                           |               |               |                 |                  |                                                                                                                                                 |                                                               |
|---------------------------|---------------|---------------|-----------------|------------------|-------------------------------------------------------------------------------------------------------------------------------------------------|---------------------------------------------------------------|
| Mdem_scaffold_1154        | 1591807       | 1596614       | K425_80         |                  |                                                                                                                                                 | EB module-containing protein                                  |
| Mdem_scaffold_1154        | 1597939       | 1599508       | K425_77         |                  |                                                                                                                                                 | hypothetical protein                                          |
| Mdem_scaffold_1154        | 1599509       | 1601843       | K425_78         |                  |                                                                                                                                                 | conserved uncharacterized protein                             |
| Mdem_scaffold_1154        | 1601226       | 1606666       | K425_79         |                  |                                                                                                                                                 | Immunoglobulin domain-containing protein                      |
| Mdem_scaffold_1199        | 29604         | 35477         | K425_181        |                  |                                                                                                                                                 | Transcription factor castor-like protein                      |
| Mdem_scaffold_1199        | 61117         | 71047         | K425_182        |                  |                                                                                                                                                 | conserved uncharacterized protein                             |
| Mdem_scaffold_1199        | 72407         | 74653         | K425_183        |                  | similar to 19.5g1 protein from Chelonus inanitus bracovirus                                                                                     | conserved uncharacterized protein                             |
| Mdem_scaffold_1199        | 75617         | 90529         | K425_187        |                  |                                                                                                                                                 | alkaline phosphatase, tissue-nonspecific isozyme-like protein |
| Mdem_scaffold_1199        | 95469         | 97370         | K425_186        |                  |                                                                                                                                                 | hypothetical protein                                          |
| Mdem_scaffold_1199        | 114660        | 119705        | K425_184        |                  | similar to GIP_L6_0020, GFP_L3_0430                                                                                                             | G-patch domain-containing protein                             |
| Mdem_scaffold_1199        | 118077        | 119162        | K425_185        |                  |                                                                                                                                                 | hypothetical protein                                          |
| Mdem_scaffold_1213        | 1018          | 2634          | K425_190        |                  | similar to GFP_L5_0170                                                                                                                          | conserved uncharacterized protein family 1                    |
| Mdem_scaffold_1213        | 16930         | 18907         | K425_189        |                  |                                                                                                                                                 | transposable element-like protein                             |
| <b>Mdem_scaffold_1213</b> | <b>26279</b>  | <b>28159</b>  | <b>K425_188</b> | <b>vlf-1b-1</b>  | <b>synonym HzNVorf140-like, present in Microplitis demolitor virus particles</b>                                                                | <b>very late factor 1b-1, bracovirus particle protein</b>     |
| Mdem_scaffold_1462        | 142           | 6458          | K425_247        |                  |                                                                                                                                                 | Microtubule-binding protein MIP-T3-like protein               |
| Mdem_scaffold_1462        | 11050         | 26452         | K425_210        |                  |                                                                                                                                                 | protein Malvolio-like protein                                 |
| Mdem_scaffold_1462        | 28722         | 35431         | K425_245        |                  |                                                                                                                                                 | prostatic acid phosphatase-like protein                       |
| Mdem_scaffold_1462        | 38283         | 41763         | K425_244        |                  |                                                                                                                                                 | conserved uncharacterized protein                             |
| Mdem_scaffold_1462        | 47378         | 51827         | K425_211        |                  |                                                                                                                                                 | hypothetical protein                                          |
| Mdem_scaffold_1462        | 56804         | 57079         | K425_246        |                  |                                                                                                                                                 | histone H4 replacement-like protein                           |
| Mdem_scaffold_1462        | 69982         | 70559         | K425_243        |                  |                                                                                                                                                 | histone H2A-like protein                                      |
| Mdem_scaffold_1462        | 70593         | 71198         | K425_212        |                  |                                                                                                                                                 | histone H2B-like protein                                      |
| Mdem_scaffold_1462        | 75163         | 94006         | K425_242        |                  | similar to GIP_L8_0090 and GIP_L8_0100                                                                                                          | NAD nucleotidase                                              |
| Mdem_scaffold_1462        | 99028         | 102378        | K425_213        |                  | similar to GIP_L8_0090 and GIP_L8_0100                                                                                                          | 5' nucleotidase, putative                                     |
| Mdem_scaffold_1462        | 104405        | 118625        | K425_214        |                  | similar to GIP_L8_0060                                                                                                                          | conserved uncharacterized protein                             |
| Mdem_scaffold_1462        | 127011        | 129178        | K425_215        |                  |                                                                                                                                                 | hypothetical protein                                          |
| Mdem_scaffold_1462        | 130282        | 156201        | K425_241        |                  | similar to GIP_L8_0050                                                                                                                          | P-type ATPase of unknown pump specificity (type V)            |
| Mdem_scaffold_1462        | 166508        | 177083        | K425_240        |                  | similar to GFP_L7_0800 and GIP_L8_0040                                                                                                          | hyaluronidase-like protein                                    |
| Mdem_scaffold_1462        | 182279        | 183536        | K425_239        |                  | similar to GIP_L1_00710, GFP_L7_0750 and GFP_L7_0760                                                                                            | hyaluronidase                                                 |
| Mdem_scaffold_1462        | 186733        | 189019        | K425_238        |                  | similar to GIP_L1_00710, GFP_L7_0750 and GFP_L7_0760                                                                                            | hyaluronidase                                                 |
| Mdem_scaffold_1462        | 191489        | 199383        | K425_237        |                  | similar to GFP_L7_0740 and GIP_L1_00700                                                                                                         | N-myristoyltransferase, putative                              |
| Mdem_scaffold_1462        | 201614        | 203551        | K425_236        |                  | similar to GFP_L7_0730 and GIP_L1_00690                                                                                                         | conserved uncharacterized protein                             |
| Mdem_scaffold_1462        | 203940        | 204011        | K425_209        |                  |                                                                                                                                                 | tRNA-Ser                                                      |
| <b>Mdem_scaffold_1462</b> | <b>207985</b> | <b>208806</b> | <b>K425_216</b> | <b>orph-P1</b>   |                                                                                                                                                 | <b>conserved hypothetical protein</b>                         |
| <b>Mdem_scaffold_1462</b> | <b>217931</b> | <b>218686</b> | <b>K425_217</b> | <b>orph-K1-1</b> |                                                                                                                                                 | <b>conserved hypothetical protein</b>                         |
| <b>Mdem_scaffold_1462</b> | <b>220695</b> | <b>222273</b> | <b>K425_235</b> | <b>orph-K1-2</b> |                                                                                                                                                 | <b>conserved hypothetical protein</b>                         |
| <b>Mdem_scaffold_1462</b> | <b>223842</b> | <b>224575</b> | <b>K425_218</b> | <b>orph-K1-3</b> | <b>similar to orph-K1</b>                                                                                                                       | <b>hypothetical protein</b>                                   |
| <b>Mdem_scaffold_1462</b> | <b>225913</b> | <b>230837</b> | <b>K425_234</b> | <b>orph-K1-4</b> |                                                                                                                                                 | <b>hypothetical protein</b>                                   |
| <b>Mdem_scaffold_1462</b> | <b>233190</b> | <b>238900</b> | <b>K425_219</b> | <b>orph-K2</b>   |                                                                                                                                                 | <b>hypothetical protein</b>                                   |
| <b>Mdem_scaffold_1462</b> | <b>237108</b> | <b>240824</b> | <b>K425_233</b> | <b>orph-K3</b>   |                                                                                                                                                 | <b>hypothetical protein</b>                                   |
| <b>Mdem_scaffold_1462</b> | <b>240720</b> | <b>243546</b> | <b>K425_232</b> | <b>orph-K4</b>   |                                                                                                                                                 | <b>hypothetical protein</b>                                   |
| <b>Mdem_scaffold_1462</b> | <b>240801</b> | <b>241109</b> | <b>K425_220</b> | <b>orph-K1</b>   |                                                                                                                                                 | <b>hypothetical protein</b>                                   |
| <b>Mdem_scaffold_1462</b> | <b>245225</b> | <b>245491</b> | <b>K425_221</b> | <b>orph-Q1</b>   | <b>similar to orph-M3</b>                                                                                                                       | <b>conserved hypothetical protein</b>                         |
| <b>Mdem_scaffold_1462</b> | <b>245737</b> | <b>246360</b> | <b>K425_222</b> | <b>orph-Q2</b>   |                                                                                                                                                 | <b>conserved hypothetical protein</b>                         |
| <b>Mdem_scaffold_1462</b> | <b>248051</b> | <b>250525</b> | <b>K425_231</b> | <b>orph-Q3</b>   |                                                                                                                                                 | <b>conserved hypothetical protein</b>                         |
| <b>Mdem_scaffold_1462</b> | <b>250590</b> | <b>251467</b> | <b>K425_223</b> | <b>orph-Q4</b>   |                                                                                                                                                 | <b>conserved hypothetical protein Segment Q family</b>        |
| <b>Mdem_scaffold_1462</b> | <b>252823</b> | <b>254053</b> | <b>K425_224</b> | <b>orph-Q5</b>   |                                                                                                                                                 | <b>conserved hypothetical protein Segment Q family</b>        |
| <b>Mdem_scaffold_1462</b> | <b>255114</b> | <b>257123</b> | <b>K425_230</b> | <b>orph-Q6</b>   |                                                                                                                                                 | <b>conserved hypothetical protein</b>                         |
| <b>Mdem_scaffold_1462</b> | <b>257659</b> | <b>258244</b> | <b>K425_229</b> | <b>orph-Q7</b>   |                                                                                                                                                 | <b>conserved hypothetical protein</b>                         |
| <b>Mdem_scaffold_1462</b> | <b>259642</b> | <b>260432</b> | <b>K425_225</b> | <b>orph-D5</b>   |                                                                                                                                                 | <b>conserved hypothetical protein</b>                         |
| <b>Mdem_scaffold_1462</b> | <b>260469</b> | <b>261202</b> | <b>K425_226</b> | <b>orph-D6</b>   |                                                                                                                                                 | <b>conserved hypothetical protein</b>                         |
| <b>Mdem_scaffold_1462</b> | <b>263057</b> | <b>265266</b> | <b>K425_228</b> | <b>orph-D7</b>   |                                                                                                                                                 | <b>conserved hypothetical protein</b>                         |
| <b>Mdem_scaffold_1462</b> | <b>264392</b> | <b>265428</b> | <b>K425_227</b> | <b>orph-D8</b>   |                                                                                                                                                 | <b>conserved hypothetical protein</b>                         |
| <b>Mdem_scaffold_1559</b> | <b>1816</b>   | <b>4332</b>   | <b>K425_415</b> | <b>odv-e66-5</b> |                                                                                                                                                 | <b>putative envelope protein ODV-E66-5</b>                    |
| <b>Mdem_scaffold_1559</b> | <b>5445</b>   | <b>7426</b>   | <b>K425_410</b> | <b>odv-e66-6</b> |                                                                                                                                                 | <b>putative envelope protein ODV-E66-6</b>                    |
| <b>Mdem_scaffold_1559</b> | <b>8344</b>   | <b>11093</b>  | <b>K425_411</b> | <b>odv-e66-7</b> |                                                                                                                                                 | <b>putative envelope protein ODV-E66-7</b>                    |
| Mdem_scaffold_1559        | 12935         | 15858         | K425_412        |                  | similar to GIP_L7_0080, GFP_L5_0240, GIP_L2_0090, GFP_L5_0230, GFP_L5_0070, GFP_L5_0090, GIP_L2_0100, GIP_L7_0040, GIP_L7_0010, and GFP_L5_0190 | conserved uncharacterized protein family 7                    |
| <b>Mdem_scaffold_1559</b> | <b>17598</b>  | <b>20694</b>  | <b>K425_414</b> | <b>odv-e66-8</b> |                                                                                                                                                 | <b>putative envelope protein ODV-E66-8, partial</b>           |
| Mdem_scaffold_1559        | 31649         | 43292         | K425_413        |                  |                                                                                                                                                 | Homeobox protein cut                                          |
| <b>Mdem_scaffold_1669</b> | <b>58753</b>  | <b>60347</b>  | <b>K425_475</b> |                  | <b>similar to 30b from Chelonus inanitus and Cotesia congregata hypothetical protein CBL47423</b>                                               | <b>conserved uncharacterized protein</b>                      |
| Mdem_scaffold_1798        | 2919          | 3935          | K425_519        |                  |                                                                                                                                                 | RNA-binding protein MEX3B-like protein                        |
| Mdem_scaffold_1798        | 28732         | 30994         | K425_518        |                  |                                                                                                                                                 | RNA-binding protein MEX3B-like protein                        |
| Mdem_scaffold_1798        | 38067         | 40091         | K425_476        |                  |                                                                                                                                                 | Protein tyrosine phosphatase-like protein ptplad1             |
| Mdem_scaffold_1798        | 40104         | 42586         | K425_477        |                  |                                                                                                                                                 | aldehyde dehydrogenase, mitochondrial-like protein            |
| Mdem_scaffold_1798        | 42844         | 45926         | K425_517        |                  |                                                                                                                                                 | Myotubularin-associated-like protein                          |
| Mdem_scaffold_1798        | 46207         | 49593         | K425_478        |                  |                                                                                                                                                 | Meiotic recombination protein REC8-like protein               |
| Mdem_scaffold_1798        | 49818         | 51296         | K425_516        |                  |                                                                                                                                                 | hypothetical protein                                          |

|                           |               |               |                 |                    |                                                                                  |                                                                                                |
|---------------------------|---------------|---------------|-----------------|--------------------|----------------------------------------------------------------------------------|------------------------------------------------------------------------------------------------|
| Mdem_scaffold_1798        | 51611         | 55330         | K425_479        |                    |                                                                                  | ATP-dependent protease La                                                                      |
| Mdem_scaffold_1798        | 55405         | 56357         | K425_515        |                    |                                                                                  | gonadal protein gdl-like protein                                                               |
| Mdem_scaffold_1798        | 56358         | 57580         | K425_480        |                    |                                                                                  | 28S ribosomal protein S15, mitochondrial-like protein                                          |
| Mdem_scaffold_1798        | 57630         | 59348         | K425_514        |                    |                                                                                  | Apoptosis antagonizing transcription factor domain-containing protein                          |
| Mdem_scaffold_1798        | 62069         | 69334         | K425_481        |                    |                                                                                  | fantom-like protein                                                                            |
| Mdem_scaffold_1798        | 64828         | 66854         | K425_513        |                    |                                                                                  | F-actin capping protein alpha subunit-like protein                                             |
| Mdem_scaffold_1798        | 72214         | 74186         | K425_512        |                    |                                                                                  | hypothetical protein                                                                           |
| Mdem_scaffold_1798        | 81045         | 109011        | K425_482        |                    |                                                                                  | Muscle M-line assembly protein unc-89-like protein                                             |
| Mdem_scaffold_1798        | 83307         | 83828         | K425_511        |                    |                                                                                  | hypothetical protein                                                                           |
| Mdem_scaffold_1798        | 109320        | 110973        | K425_510        |                    |                                                                                  | NEDD8-conjugating enzyme UBE2F-like protein                                                    |
| Mdem_scaffold_1798        | 110134        | 112786        | K425_483        |                    |                                                                                  | vacuolar protein-sorting-associated protein 25-like protein                                    |
| Mdem_scaffold_1798        | 112086        | 117690        | K425_509        |                    |                                                                                  | excitatory amino acid transporter 4-like protein                                               |
| Mdem_scaffold_1798        | 121028        | 122385        | K425_508        |                    |                                                                                  | Cyclin-dependent kinase subunit 30A                                                            |
| Mdem_scaffold_1798        | 122467        | 130324        | K425_484        |                    |                                                                                  | UDP-N-acetylglucosamine-dolichyl-phosphate N-acetylglucosaminylphosphotransferase-like protein |
| Mdem_scaffold_1798        | 123740        | 126311        | K425_507        |                    |                                                                                  | beta-1,4-mannosyl-glycoprotein 4-beta-N-acetylglucosaminyltransferase-like protein             |
| Mdem_scaffold_1798        | 127828        | 130928        | K425_506        |                    |                                                                                  | mitochondrial import receptor subunit TOM70-like protein                                       |
| Mdem_scaffold_1798        | 130558        | 132523        | K425_485        |                    |                                                                                  | NuA4, Histone acetyltransferase subunit NuA4 domain-containing protein                         |
| Mdem_scaffold_1798        | 132826        | 133905        | K425_505        |                    |                                                                                  | Insect cuticle domain-containing protein                                                       |
| Mdem_scaffold_1798        | 134350        | 137545        | K425_486        |                    |                                                                                  | gonadotropin-releasing hormone receptor-like protein                                           |
| Mdem_scaffold_1798        | 138401        | 144648        | K425_487        |                    |                                                                                  | thrombospondin-like protein                                                                    |
| Mdem_scaffold_1798        | 145788        | 156029        | K425_504        |                    |                                                                                  | c-Maf-inducing-like protein                                                                    |
| Mdem_scaffold_1798        | 159491        | 166608        | K425_503        |                    |                                                                                  | Metallopeptidase family M24 protein                                                            |
| Mdem_scaffold_1798        | 170198        | 171151        | K425_502        |                    |                                                                                  | Glycogen synthase kinase-3 binding domain-containing protein                                   |
| Mdem_scaffold_1798        | 171337        | 175599        | K425_501        |                    |                                                                                  | HAUS augmin-like protein complex subunit 3-like protein                                        |
| Mdem_scaffold_1798        | 178132        | 180631        | K425_500        |                    |                                                                                  | Immunoglobulin domain-containing protein                                                       |
| Mdem_scaffold_1798        | 277674        | 294741        | K425_488        |                    |                                                                                  | Immunoglobulin domain-containing protein                                                       |
| <b>Mdem_scaffold_1798</b> | <b>306628</b> | <b>309224</b> | <b>K425_499</b> |                    | <b>present in Microplitis demolitor virus particles</b>                          | <b>putative viral envelope protein VP91</b>                                                    |
| Mdem_scaffold_1798        | 311685        | 320864        | K425_489        |                    |                                                                                  | gonadotropin-releasing hormone receptor-like protein                                           |
| Mdem_scaffold_1798        | 317759        | 318903        | K425_496        |                    |                                                                                  | hypothetical protein                                                                           |
| Mdem_scaffold_1798        | 322759        | 323903        | K425_497        |                    |                                                                                  | hypothetical protein                                                                           |
| Mdem_scaffold_1798        | 325930        | 329706        | K425_498        |                    |                                                                                  | conserved uncharacterized protein                                                              |
| Mdem_scaffold_1798        | 333705        | 336414        | K425_495        |                    |                                                                                  | conserved uncharacterized protein                                                              |
| Mdem_scaffold_1798        | 338270        | 340870        | K425_494        |                    |                                                                                  | cactin-like protein                                                                            |
| Mdem_scaffold_1798        | 341209        | 343114        | K425_490        |                    |                                                                                  | 2-oxoisovalerate dehydrogenase subunit alpha, mitochondrial-like protein                       |
| Mdem_scaffold_1798        | 343115        | 344039        | K425_493        |                    |                                                                                  | mitochondrial ribosomal protein L17, isoform A                                                 |
| Mdem_scaffold_1798        | 344239        | 345862        | K425_491        |                    |                                                                                  | loquacious-like protein                                                                        |
| Mdem_scaffold_1798        | 346404        | 362649        | K425_492        |                    |                                                                                  | putative dynein heavy chain 5, axonemal-like protein                                           |
| Mdem_scaffold_1887        | 12001         | 23176         | K425_520        |                    |                                                                                  | hypothetical protein                                                                           |
| Mdem_scaffold_1887        | 25068         | 26177         | K425_521        |                    |                                                                                  | hypothetical protein                                                                           |
| Mdem_scaffold_1887        | 36855         | 38594         | K425_522        |                    |                                                                                  | putative transposase                                                                           |
| Mdem_scaffold_1887        | 40268         | 41090         | K425_525        |                    |                                                                                  | conserved uncharacterized protein                                                              |
| <b>Mdem_scaffold_1887</b> | <b>59162</b>  | <b>60302</b>  | <b>K425_524</b> |                    | <b>similar to vlf-1</b>                                                          | <b>reverse transcriptase domain-containing protein</b>                                         |
| <b>Mdem_scaffold_1887</b> | <b>70283</b>  | <b>72349</b>  | <b>K425_523</b> | <b>vlf-1b-2</b>    | <b>synonym HzNVorf140-like, present in Microplitis demolitor virus particles</b> | <b>very late factor 1b-2, bracovirus particle protein</b>                                      |
| Mdem_scaffold_2026        | 4368          | 12524         | K425_560        |                    |                                                                                  | conserved uncharacterized protein                                                              |
| Mdem_scaffold_2026        | 19587         | 23526         | K425_559        |                    |                                                                                  | conserved uncharacterized protein                                                              |
| <b>Mdem_scaffold_2026</b> | <b>24788</b>  | <b>26162</b>  | <b>K425_555</b> | <b>ac92-like-1</b> | <b>similar to HzNVorf13</b>                                                      | <b>ac92-like protein, putative sulfhydryl oxidase-1</b>                                        |
| Mdem_scaffold_2026        | 30620         | 31180         | K425_556        |                    |                                                                                  | conserved uncharacterized protein                                                              |
| Mdem_scaffold_2026        | 31572         | 34637         | K425_558        |                    |                                                                                  | hypothetical protein                                                                           |
| Mdem_scaffold_2026        | 49392         | 50018         | K425_557        |                    |                                                                                  | conserved uncharacterized protein                                                              |
| Mdem_scaffold_2026        | 49580         | 49677         | K425_554        |                    |                                                                                  | tRNA-seC                                                                                       |
| <b>Mdem_scaffold_3298</b> | <b>954</b>    | <b>2437</b>   | <b>K425_948</b> | <b>orph-D9</b>     |                                                                                  | <b>conserved hypothetical protein</b>                                                          |
| <b>Mdem_scaffold_3298</b> | <b>4992</b>   | <b>9649</b>   | <b>K425_947</b> | <b>orph-B1</b>     |                                                                                  | <b>conserved hypothetical protein family 5, BEN domain-containing</b>                          |
| <b>Mdem_scaffold_3298</b> | <b>11966</b>  | <b>18742</b>  | <b>K425_945</b> | <b>orph-A3</b>     | <b>similar to orph-B1</b>                                                        | <b>conserved hypothetical protein family 5, BEN domain-containing</b>                          |
| <b>Mdem_scaffold_3298</b> | <b>21324</b>  | <b>22288</b>  | <b>K425_946</b> | <b>orph-A4</b>     |                                                                                  | <b>conserved hypothetical protein</b>                                                          |
| <b>Mdem_scaffold_3298</b> | <b>23124</b>  | <b>23642</b>  | <b>K425_944</b> | <b>orph-A1</b>     |                                                                                  | <b>conserved hypothetical protein</b>                                                          |
| <b>Mdem_scaffold_3298</b> | <b>23788</b>  | <b>24165</b>  | <b>K425_943</b> | <b>orph-A2</b>     |                                                                                  | <b>conserved hypothetical protein</b>                                                          |
| <b>Mdem_scaffold_3298</b> | <b>29198</b>  | <b>30296</b>  | <b>K425_942</b> | <b>orph-L1</b>     |                                                                                  | <b>conserved hypothetical protein</b>                                                          |
| <b>Mdem_scaffold_3298</b> | <b>38097</b>  | <b>39571</b>  | <b>K425_940</b> | <b>orph-L4</b>     |                                                                                  | <b>hypothetical protein</b>                                                                    |
| <b>Mdem_scaffold_3298</b> | <b>36359</b>  | <b>37460</b>  | <b>K425_941</b> | <b>orph-L3</b>     |                                                                                  | <b>hypothetical protein</b>                                                                    |
| <b>Mdem_scaffold_3298</b> | <b>44562</b>  | <b>44916</b>  | <b>K425_916</b> | <b>orph-F2</b>     |                                                                                  | <b>hypothetical protein</b>                                                                    |
| <b>Mdem_scaffold_3298</b> | <b>45398</b>  | <b>45901</b>  | <b>K425_939</b> | <b>ank-F5</b>      |                                                                                  | <b>viral ankyrin</b>                                                                           |
| <b>Mdem_scaffold_3298</b> | <b>46180</b>  | <b>46674</b>  | <b>K425_938</b> | <b>ank-F4</b>      |                                                                                  | <b>viral ankyrin</b>                                                                           |
| <b>Mdem_scaffold_3298</b> | <b>48028</b>  | <b>48393</b>  | <b>K425_917</b> | <b>orph-F3</b>     |                                                                                  | <b>hypothetical protein</b>                                                                    |
| <b>Mdem_scaffold_3298</b> | <b>48681</b>  | <b>49913</b>  | <b>K425_918</b> | <b>orph-F4</b>     |                                                                                  | <b>conserved hypothetical protein</b>                                                          |
| <b>Mdem_scaffold_3298</b> | <b>50911</b>  | <b>51318</b>  | <b>K425_937</b> | <b>orph-F1</b>     |                                                                                  | <b>conserved hypothetical protein</b>                                                          |
| <b>Mdem_scaffold_3298</b> | <b>52329</b>  | <b>54091</b>  | <b>K425_936</b> | <b>orph-F5</b>     |                                                                                  | <b>hypothetical protein</b>                                                                    |
| <b>Mdem_scaffold_3298</b> | <b>54754</b>  | <b>55109</b>  | <b>K425_919</b> | <b>orph-I2</b>     |                                                                                  | <b>hypothetical protein</b>                                                                    |
| <b>Mdem_scaffold_3298</b> | <b>56545</b>  | <b>56904</b>  | <b>K425_920</b> | <b>orph-I3</b>     |                                                                                  | <b>hypothetical protein</b>                                                                    |
| <b>Mdem_scaffold_3298</b> | <b>57350</b>  | <b>57853</b>  | <b>K425_935</b> | <b>ank-I1</b>      |                                                                                  | <b>viral ankyrin</b>                                                                           |
| <b>Mdem_scaffold_3298</b> | <b>61373</b>  | <b>64088</b>  | <b>K425_921</b> | <b>orph-I4</b>     |                                                                                  | <b>conserved hypothetical protein</b>                                                          |
| <b>Mdem_scaffold_3298</b> | <b>66378</b>  | <b>66707</b>  | <b>K425_934</b> | <b>orph-I1</b>     |                                                                                  | <b>conserved hypothetical protein</b>                                                          |
| <b>Mdem_scaffold_3298</b> | <b>70169</b>  | <b>70501</b>  | <b>K425_922</b> | <b>orph-M3</b>     |                                                                                  | <b>conserved hypothetical protein</b>                                                          |
| <b>Mdem_scaffold_3298</b> | <b>70749</b>  | <b>71066</b>  | <b>K425_923</b> | <b>orph-M2</b>     |                                                                                  | <b>conserved hypothetical protein</b>                                                          |
| <b>Mdem_scaffold_3298</b> | <b>73227</b>  | <b>73562</b>  | <b>K425_933</b> | <b>orph-M1</b>     |                                                                                  | <b>conserved hypothetical protein</b>                                                          |
| <b>Mdem_scaffold_3298</b> | <b>74907</b>  | <b>75940</b>  | <b>K425_924</b> | <b>orph-M6</b>     |                                                                                  | <b>conserved hypothetical protein</b>                                                          |
| <b>Mdem_scaffold_3298</b> | <b>77934</b>  | <b>78899</b>  | <b>K425_932</b> | <b>orph-M5</b>     |                                                                                  | <b>conserved hypothetical protein</b>                                                          |
| <b>Mdem_scaffold_3298</b> | <b>82328</b>  | <b>82660</b>  | <b>K425_931</b> | <b>orph-M4</b>     |                                                                                  | <b>conserved hypothetical protein</b>                                                          |

|                    |        |        |          |         |                              |                                |
|--------------------|--------|--------|----------|---------|------------------------------|--------------------------------|
| Mdem_scaffold_3298 | 82915  | 83274  | K425_930 | orph-M7 |                              | conserved hypothetical protein |
| Mdem_scaffold_3298 | 89617  | 90123  | K425_929 | ank-G4  | synonym Ikb-G2               | viral ankyrin                  |
| Mdem_scaffold_3298 | 90432  | 90962  | K425_928 | ank-G3  | synonym Ikb-G1               | viral ankyrin                  |
| Mdem_scaffold_3298 | 93653  | 94503  | K425_925 | orph-G3 |                              | conserved hypothetical protein |
| Mdem_scaffold_3298 | 95306  | 96211  | K425_926 | orph-G2 |                              | conserved hypothetical protein |
| Mdem_scaffold_3298 | 101085 | 103666 | K425_927 | glc1.8  |                              | Glc1.8                         |
| Mdem_scaffold_3350 | 6409   | 8178   | K425_975 |         |                              | hypothetical protein           |
| Mdem_scaffold_3350 | 10030  | 11101  | K425_965 |         | similar to GIP_L2_0080       | conserved hypothetical protein |
| Mdem_scaffold_3350 | 11136  | 12015  | K425_966 |         | similar to GIP_L2_0080       | conserved hypothetical protein |
| Mdem_scaffold_3350 | 13388  | 13738  | K425_967 |         |                              | sesquipedalian-1-like protein  |
| Mdem_scaffold_3350 | 15063  | 16649  | K425_974 |         |                              | Egf-like protein               |
| Mdem_scaffold_3350 | 16888  | 19044  | K425_973 |         |                              | Glc-like protein               |
| Mdem_scaffold_3350 | 21439  | 23377  | K425_972 |         |                              | Egf-like protein               |
| Mdem_scaffold_3350 | 24255  | 24957  | K425_971 |         |                              | hypothetical protein           |
| Mdem_scaffold_3350 | 25647  | 26498  | K425_970 |         | weak similarity to Cc50C22.5 | Egf-like protein               |
| Mdem_scaffold_3350 | 28694  | 29791  | K425_969 |         |                              | conserved hypothetical protein |
| Mdem_scaffold_3350 | 30278  | 32157  | K425_968 |         |                              | conserved hypothetical protein |
