# Supplementary material for: Widespread Genome Reorganization of an Obligate Virus Mutualist
Source: PubMed Central journal article supplement (PMC4169385; doi:10.1371/journal.pgen.1004660), 2014-09-18
Supplement: pgen.1004660.s006.pdf [file pgen.1004660.s006.pdf]

### Links between nudivirus-like regions and regions flanking proviral segments

BVs (*M. demolitor* specifically)

| Scaffold           | Segment-linked genes Md | Nudivirus-linked genes | Nearest separating distance | Note                                                              |
|--------------------|-------------------------|------------------------|-----------------------------|-------------------------------------------------------------------|
| Mdem_scaffold_0157 | Segment T               | H2NVorf93-like         | 5.4 kb                      | A scaffold that contains Segment T also has a nudivirus-like gene |

BVs

| Scaffold           | Segment-linked genes Md                                | Segment linked genes other BVs                                                                                                                                                                                                          | Nudivirus-linked genes                                   | Nearest separating distance | Note                                                                                                                                                                                                                                                            |
|--------------------|--------------------------------------------------------|-----------------------------------------------------------------------------------------------------------------------------------------------------------------------------------------------------------------------------------------|----------------------------------------------------------|-----------------------------|-----------------------------------------------------------------------------------------------------------------------------------------------------------------------------------------------------------------------------------------------------------------|
| Mdem_scaffold_0938 | K425_1716, K425_1718, K425_1728                        | Glyptapanteles Locus 3 (Desjardins et al. 2008): GFP_L6_0020, GFP_L6_0170, and GFP_L6_0160; GIP_L3_0040 and GIP_L3_0210                                                                                                                 | p47                                                      | 30.5 kb                     | Scaffold 938 possesses genes that are similar to those flanking Segments 22 and 23 in <i>Glyptapanteles</i> species, and also carries a nudivirus-like gene p47                                                                                                 |
| Mdem_scaffold_1213 | K425_190                                               | Glyptapanteles flavicoxis Locus 7 (Desjardins et al. 2008): GFP_L5_0170                                                                                                                                                                 | vlf-1b-1                                                 | 23.6 kb                     | Scaffold 1213 has a gene similar to a gene flanking Segments 27 and 28 in <i>Glyptapanteles flavicoxis</i> , and also carries vlf-1b-1                                                                                                                          |
| Mdem_scaffold_0019 | K425_529, K425_534, K425_544                           | Glyptapanteles flavicoxis Locus 7 (Desjardins et al. 2008): GFP_L5_0170 and GFP_L5_0200                                                                                                                                                 | int-2                                                    | 24.2 kb                     | Scaffold 19 has possesses genes similar to those flanking Segments 27 and 28 in <i>Glyptapanteles flavicoxis</i> , and also carries int-2                                                                                                                       |
| Mdem_scaffold_0275 | K425_820 (conserved uncharacterized protein family 7)  | Glyptapanteles flavicoxis Locus 7 (Desjardins et al. 2008): GFP_L5_0070, GFP_L5_0090, GFP_L5_0190, GFP_L5_0230, GFP_L5_0240; Glyptapanteles indiensis Locus 6, Locus 7: GIP_L2_0090, GIP_L2_0100, GIP_L7_0040, GIP_L7_0010, GIP_L7_0080 | several nudivirus-like genes, closest is helicase        | 58.5 kb                     | A conserved uncharacterized gene family member in <i>M. demolitor</i> is present in several <i>Glyptapanteles</i> loci containing viral segments (Segment 27 and 28 in Gf, Segment 26 in Gi) and is on a Md scaffold that contains several nudivirus-like genes |
| Mdem_scaffold_1559 | K425_412 (conserved uncharacterized protein family 7)  | Glyptapanteles flavicoxis Locus 7 (Desjardins et al. 2008): GFP_L5_0070, GFP_L5_0090, GFP_L5_0190, GFP_L5_0230, GFP_L5_0240; Glyptapanteles indiensis Locus 6, Locus 7: GIP_L2_0090, GIP_L2_0100, GIP_L7_0040, GIP_L7_0010, GIP_L7_0080 | cluster of odv-e66 genes                                 | 1.7 kb                      | A conserved uncharacterized gene family member in <i>M. demolitor</i> is present in several <i>Glyptapanteles</i> loci containing viral segments (Segment 27 and 28 in Gf, Segment 26 in Gi) and is on a Md scaffold that contains a cluster of odv-e66 genes   |
| Mdem_scaffold_0004 | K425_1388 (conserved uncharacterized protein family 7) | Glyptapanteles flavicoxis Locus 7 (Desjardins et al. 2008): GFP_L5_0070, GFP_L5_0090, GFP_L5_0190, GFP_L5_0230, GFP_L5_0240; Glyptapanteles indiensis Locus 6, Locus 7: GIP_L2_0090, GIP_L2_0100, GIP_L7_0040, GIP_L7_0010, GIP_L7_0080 | several nudivirus-like genes, closest is odv-e66 cluster | 197 kb                      | A conserved uncharacterized gene family member in <i>M. demolitor</i> is present in several <i>Glyptapanteles</i> loci containing viral segments (Segment 27 and 28 in Gf, Segment 26 in Gi) and is on a Md scaffold that contains a cluster of odv-e66 genes   |
| Mdem_scaffold_0040 | K425_1276                                              | Glyptapanteles indiensis Locus 2 (Desjardins et al. 2008): GIP_L8_0090 and GIP_L8_0100                                                                                                                                                  | cluster of pif-5 genes                                   | 190 kb                      | A 5' nucleotidase gene is similar to genes flanking segments 9-21 of the macrolocus in <i>G. indiensis</i> . This gene is located on a scaffold with a cluster of pif-5 genes.                                                                                  |

### Links between nudivirus-like regions and virulence genes on proviral segments

BVs

| Scaffold           | Segment-linked genes Md | Segment linked genes other BVs                                                                              | Nudivirus-linked genes                                   | Nearest separating distance | Note                                                                                                                  |
|--------------------|-------------------------|-------------------------------------------------------------------------------------------------------------|----------------------------------------------------------|-----------------------------|-----------------------------------------------------------------------------------------------------------------------|
| Mdem_scaffold_0004 | K425_1471               | hypothetical protein Cotesia congregata bracovirus CcBV_23.4, GIP_L1_00360, and GFP_L7_0430 Ribonuclease T2 | several nudivirus-like genes, closest is odv-e66 cluster | 462 kb                      | A gene similar to BV virulence ribonuclease T2 genes is on a scaffold that also contains several nudivirus-like genes |
| Mdem_scaffold_0435 | K425_1354, K425_1355    | hypothetical protein Cotesia congregata bracovirus CcBV_2.3                                                 | ac92-like gene                                           | 2.2 kb                      | A gene similar to a BV virulence gene from CcBV is on a scaffold that also contains an ac92-like gene                 |

GVs (Glypta fumiferanae ichnovirus)

| Scaffold           | Segment-linked genes Md | Segment linked genes other GVs                                                                                                                                                   | Nudivirus-linked genes                         | Nearest separating distance | Note                                                                                                                                                                     |
|--------------------|-------------------------|----------------------------------------------------------------------------------------------------------------------------------------------------------------------------------|------------------------------------------------|-----------------------------|--------------------------------------------------------------------------------------------------------------------------------------------------------------------------|
| Mdem_scaffold_0116 | K425_142, K425_180      | aminopeptidase-like Glypta fumiferanae ichnovirus GfV-B16-ORF1 protein, Glyptapanteles flavicoxis hypothetical protein, GFP_L5_0170, Chelonus inanitus GfV-B16-ORF1-like protein | several nudivirus-like genes, closest is pif-4 | 15.7 kb                     | A gene similar to Glypta fumiferanae IV, Glyptapanteles flavicoxis BV, and Chelonus inanitus BV is present on a scaffold that also contains several nudivirus-like genes |
| Mdem_scaffold_0407 | K425_1082               | aminopeptidase-like Glypta fumiferanae ichnovirus GfV-B16-ORF1 protein, Glyptapanteles flavicoxis hypothetical protein, GFP_L5_0170, Chelonus inanitus GfV-B16-ORF1-like protein | lef-4                                          | 316 kb                      | A gene similar to Glypta fumiferanae IV, Glyptapanteles flavicoxis BV, and Chelonus inanitus BV is present on a scaffold that also contains lef-4                        |

**Gene families present in *M. demolitor* that link nudivirus-like and segment containing scaffolds**

| Gene family name                                                                                         | Present on nudivirus-like scaffolds                                                                                                   | Present on segment-containing scaffolds   |
|----------------------------------------------------------------------------------------------------------|---------------------------------------------------------------------------------------------------------------------------------------|-------------------------------------------|
| conserved uncharacterized protein family 3, similar to venom protein 2 from <i>Microctonus hyperodae</i> | Mdem_scaffold_0275,<br>Mdem_scaffold_0331,<br>Mdem_scaffold_0004,<br>Mdem_scaffold_0040,<br>Mdem_scaffold_0407,<br>Mdem_scaffold_0919 | Mdem_scaffold_0157                        |
| cytochrome P450 domain-containing protein family                                                         | Mdem_scaffold_0004,<br>Mdem_scaffold_0275,<br>Mdem_scaffold_1154                                                                      | Mdem_scaffold_0025                        |
| EB module-containing protein family                                                                      | Mdem_scaffold_0004,<br>Mdem_scaffold_0275,<br>Mdem_scaffold_0407,<br>Mdem_scaffold_0435,<br>Mdem_scaffold_0528                        | Mdem_scaffold_0025                        |
| ankyrin-repeat containing protein                                                                        | Mdem_scaffold_0004                                                                                                                    | Mdem_scaffold_0014,<br>Mdem_scaffold_0025 |
| Endoribonuclease XendoU domain-containing protein family                                                 | Mdem_scaffold_0407                                                                                                                    | Mdem_scaffold_0025                        |
| Flavin-containing monooxygenase-like family                                                              | Mdem_scaffold_0275                                                                                                                    | Mdem_scaffold_0014                        |
| protein tyrosine kinase family                                                                           | Mdem_scaffold_0407                                                                                                                    | Mdem_scaffold_0014,<br>Mdem_scaffold_0412 |
| Haloacid dehalogenase-like hydrolase domain-containing protein family                                    | Mdem_scaffold_0407                                                                                                                    | Mdem_scaffold_0025                        |
| Immunoglobulin domain-containing protein family                                                          | Mdem_scaffold_0275,<br>Mdem_scaffold_1798                                                                                             | Mdem_scaffold_0014                        |
| P-type ATPase of unknown pump specificity (type V) family                                                | Mdem_scaffold_0067                                                                                                                    | Mdem_scaffold_1462                        |
| Phosphatidylinositol-specific phospholipase C, X domain-containing protein family                        | Mdem_scaffold_0275,<br>Mdem_scaffold_0040                                                                                             | Mdem_scaffold_0157                        |
| acid phosphatase-like protein family                                                                     | Mdem_scaffold_0040                                                                                                                    | Mdem_scaffold_1462                        |
| kelch-like protein family                                                                                | Mdem_scaffold_0275                                                                                                                    | Mdem_scaffold_0014                        |
| kinesin-like protein KIF11 family                                                                        | Mdem_scaffold_0040,<br>Mdem_scaffold_1154                                                                                             | Mdem_scaffold_0014                        |
| scavenger receptor class B member-like family                                                            | Mdem_scaffold_1154                                                                                                                    | Mdem_scaffold_0025                        |
| ubiquitin thioesterase traid-like protein                                                                | Mdem_scaffold_0407                                                                                                                    | Mdem_scaffold_0025                        |
| transporter, solute:sodium symporter (SSS) family                                                        | Mdem_scaffold_0404,<br>Mdem_scaffold_0407                                                                                             | Mdem_scaffold_0025                        |
| lipase domain-containing protein family                                                                  | Mdem_scaffold_0240                                                                                                                    | Mdem_scaffold_0025                        |

**Gene families present in *M. demolitor* that link segment containing scaffolds**

| Gene family name | Present on segment-containing scaffolds                                                 |
|------------------|-----------------------------------------------------------------------------------------|
| Histone proteins | Mdem_scaffold_0014,<br>Mdem_scaffold_0157,<br>Mdem_scaffold_0446,<br>Mdem_scaffold_1462 |

[only includes those not already listed above]

**Gene families present in M. demolitor that link nudivirus-like scaffolds**

| Gene family name                               | Present on nudivirus-like scaffolds                               |
|------------------------------------------------|-------------------------------------------------------------------|
| conserved uncharacterized protein family 1     | Mdem_scaffold_0919,<br>Mdem_scaffold_1213                         |
| conserved uncharacterized protein family 2     | Mdem_scaffold_0116,<br>Mdem_scaffold_0407                         |
| conserved uncharacterized protein family 3     | Mdem_scaffold_0275,<br>Mdem_scaffold_0919                         |
| alpha-tubulin-like family                      | Mdem_scaffold_0275,<br>Mdem_scaffold_0528,<br>Mdem_scaffold_0919, |
| annexin-like family                            | Mdem_scaffold_0040,<br>Mdem_scaffold_0275                         |
| another transcription unit-like family         | Mdem_scaffold_0004,<br>Mdem_scaffold_0331                         |
| BTB/POZ domain containing protein family       | Mdem_scaffold_0275,<br>Mdem_scaffold_0919,                        |
| disintegrin and metalloproteinase domain       | Mdem_scaffold_0116,<br>Mdem_scaffold_0407                         |
| glucose dehydrogenase acceptor-like family     | Mdem_scaffold_0004,<br>Mdem_scaffold_0407,<br>Mdem_scaffold_1154  |
| lipase 3-like family                           | Mdem_scaffold_0004,<br>Mdem_scaffold_0407                         |
| MFS sugar transporter domain-containing family | Mdem_scaffold_0004,<br>Mdem_scaffold_0938                         |
| neprilysin-like family                         | Mdem_scaffold_0067,<br>Mdem_scaffold_0938,<br>Mdem_scaffold_1154  |
| clavesin-2-like family                         | Mdem_scaffold_0004,<br>Mdem_scaffold_0407                         |

[only includes those not already listed above]
