# Supplementary material for: Widespread Genome Reorganization of an Obligate Virus Mutualist
Source: PubMed Central journal article supplement (PMC4169385; doi:10.1371/journal.pgen.1004660), 2014-09-18
Supplement: pgen.1004660.s007.pdf [file pgen.1004660.s007.pdf]

| Segment    | Primer name | Sequence 5'-3'             | Expected product (bp) |
|------------|-------------|----------------------------|-----------------------|
| Segment P  | P-F         | AGGGATCCAATTGTTTATAATTTCC  | 705                   |
|            | P-R         | CGTTATGTATGAAATTAGCTTCTCAA |                       |
| Segment K1 | K1_F        | TTGATTATTTTTATTGGTCTCAGAAA | 718                   |
|            | K1_R        | GTAATGATTGTCAACTCGGAAAAA   |                       |
| Segment K  | K-F         | TGCACTAGGTATGATGGTCAGC     | 666                   |
|            | K-R         | ATTCAACCGAGGCTTGGACTA      |                       |
| Segment Q  | Q-F         | TGCCTAGTAGGGGTCGAGAA       | 418                   |
|            | Q-R         | CCAATTCAATGGACGTTTGG       |                       |
| Segment D  | D-F         | CCAGAGGCTACCAGGAATGA       | 418                   |
|            | D-R         | GTGCGGACCTTCAGCAACTA       |                       |
| Segment S  | S-F         | TGTTATCTAAGAGGCATGCTATGG   | 404                   |
|            | S-R         | TGAACATTTACGCTGACAAGC      |                       |
| Segment T  | T-F         | AACGAATGACGATCGGTCTG       | 400                   |
|            | T-R         | CTAGCACTGATTGCCAGGTC       |                       |
| Segment U  | U-F         | GATTTTGAACCGTACAGGGATT     | 403                   |
|            | U-R         | GAGCCCATCCCAAAAAGATA       |                       |
| Segment V  | V-F         | CATGGCGACGTGATGTCTAC       | 475                   |
|            | V-R         | TATCATCGGTCGGTTTTTCG       |                       |
| Segment W  | W-F         | TACCTCGACTAGCGGTGCTT       | 437                   |
|            | W-R         | GCGAACGGTCACTACTGAAA       |                       |
| Segment X  | X-F         | GAAAATTTTCGATTTGGAGACCA    | 428                   |
|            | X-R         | GCCAGATAGTTTGTCCGACTT      |                       |
| Segment R  | R-F         | TCATCTGTTTTGCGGACATT       | 439                   |
|            | R-R         | TGGATATGATCATGATGCTTAATTT  |                       |
| Segment A  | A-F         | ATTTGCGCCGGTATGAAGTA       | 577                   |
|            | A-R         | ACATAGAGGCGCCAAACAAG       |                       |
| Segment B  | B-F         | TGCCGAAACTTTTCTAACG        | 631                   |
|            | B-R         | GGTGCTGAATCCGTTCAATTT      |                       |
